# Supplementary material for: Identifying CDC7 as a synergistic target of chemotherapy in resistant small-cell lung cancer via CRISPR/Cas9 screening
Source: PubMed Central journal article supplement (PMC9892530; doi:10.1038/s41420-023-01315-2), 2023-02-02

Figure 2 Western blot original images

H69-AR

H446-DDP

CDC7

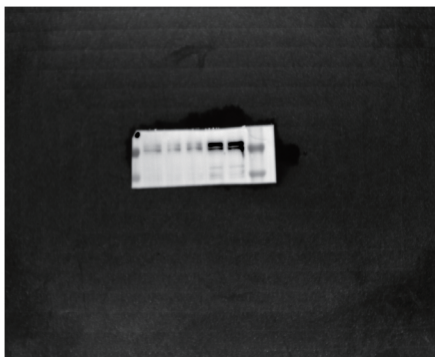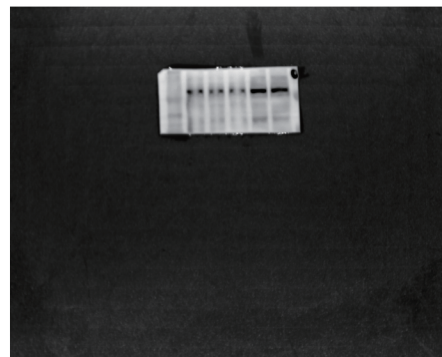

MCM2

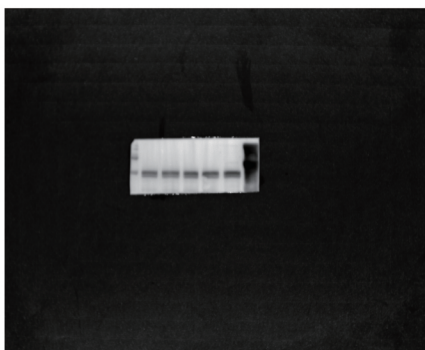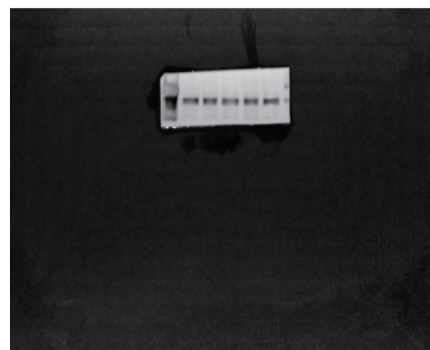

p-MCM2

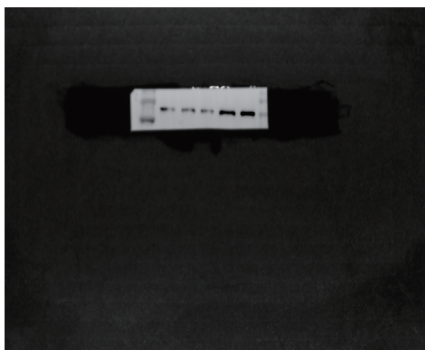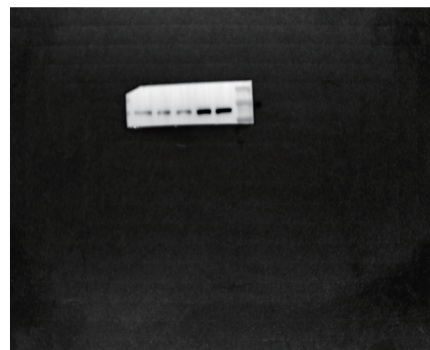

GAPDH

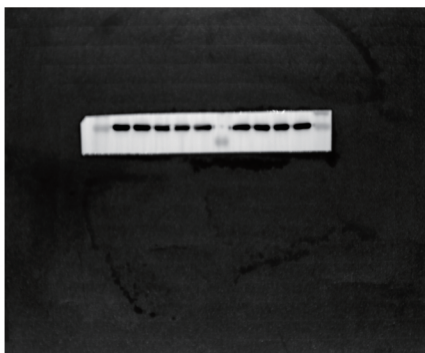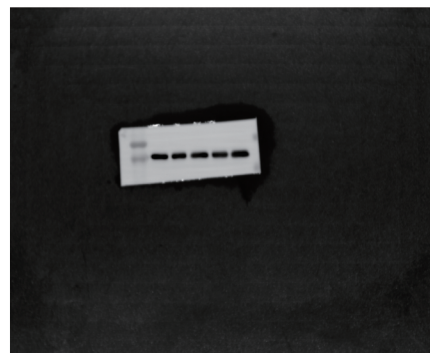

Figure 4 Western blot original images

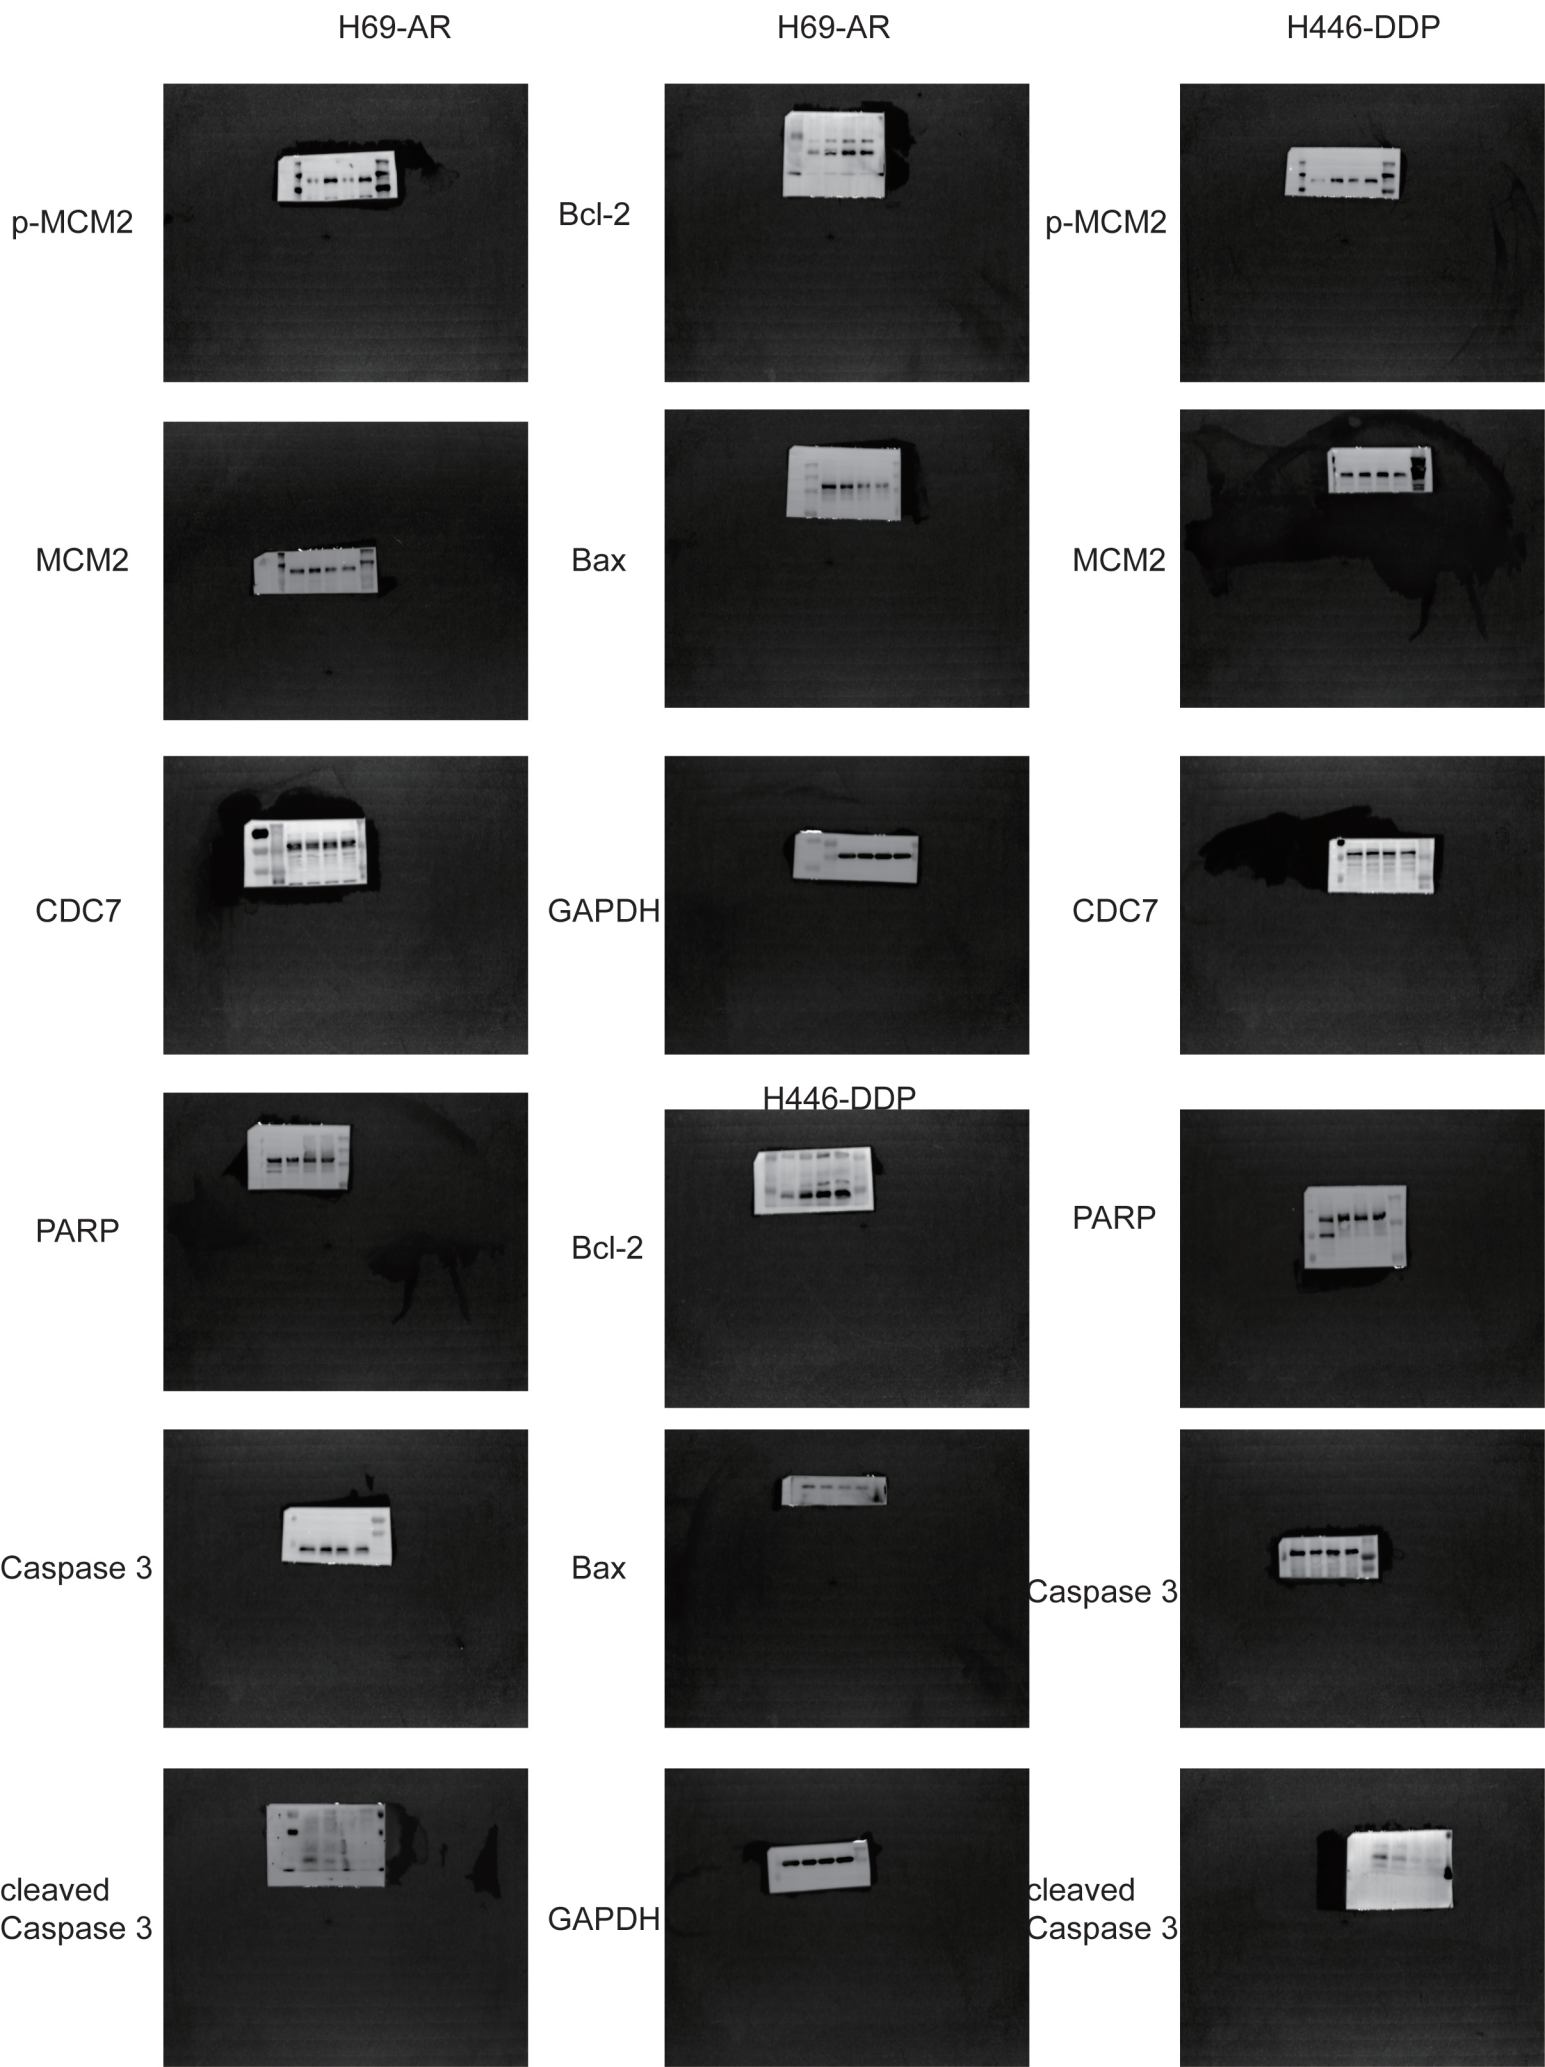

Figure 5 Western blot original images

H69-AR

H446-DDP

p-Chk1

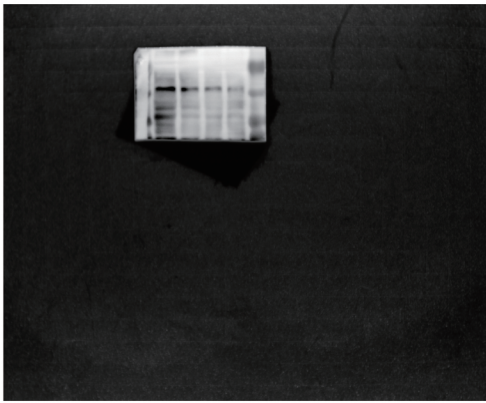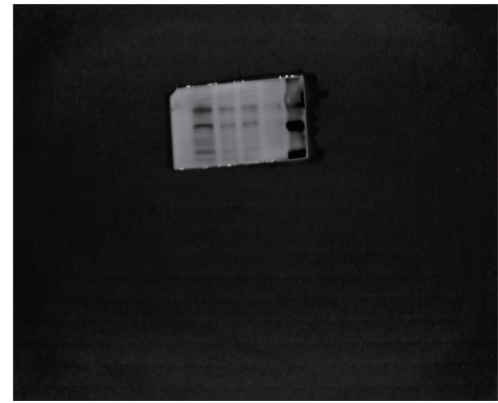

Chk1

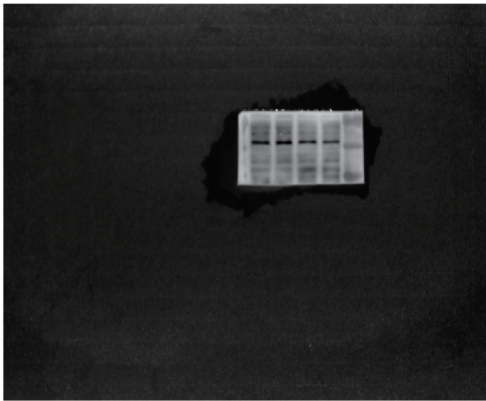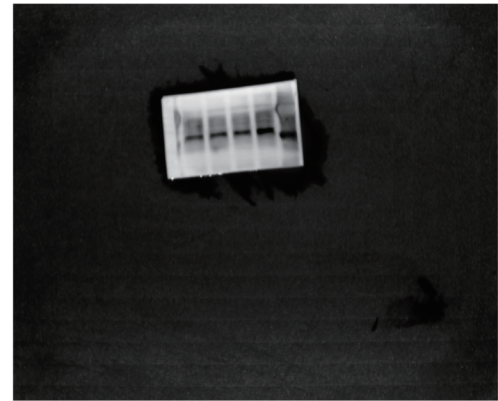

cyclin E1

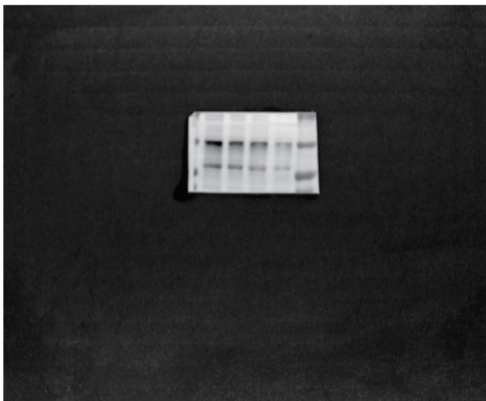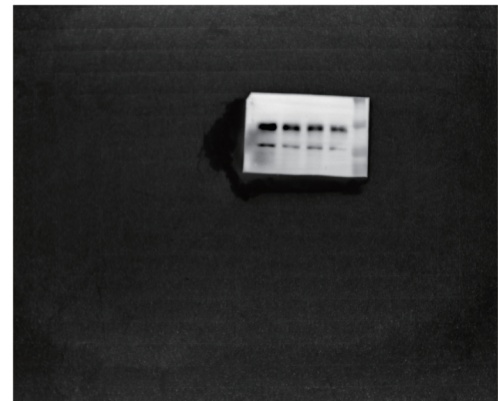

cyclin D1

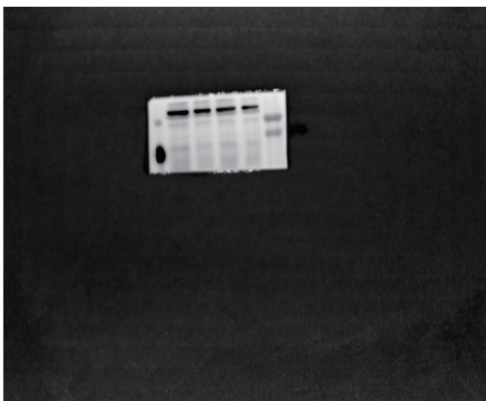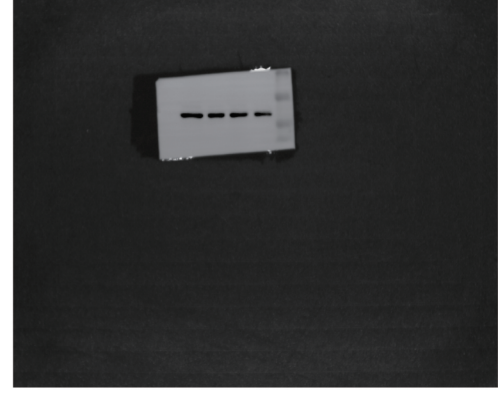

GAPDH

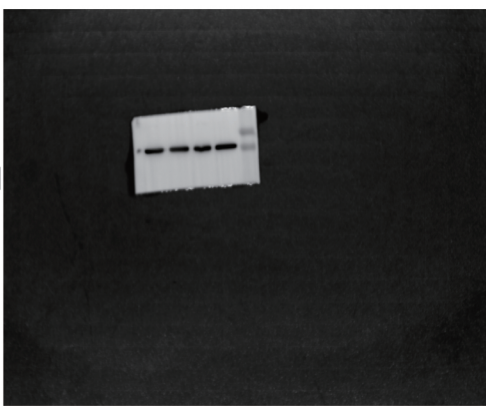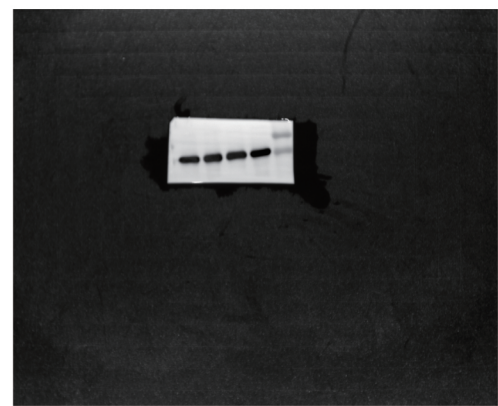

Supplement: 41420_2023_1315_MOESM9_ESM.pdf [file 41420_2023_1315_MOESM9_ESM.pdf]
