# Supplementary material for: Identifying CDC7 as a synergistic target of chemotherapy in resistant small-cell lung cancer via CRISPR/Cas9 screening
Source: Cell Death Discov. 2023 Feb 2;9:40. doi: 10.1038/s41420-023-01315-2 (PMC9892530; doi:10.1038/s41420-023-01315-2)
Supplement: Supplementary file 8 — Table S1 The sgRNA enrichmen between DMSO and chemo-treatment in H69-AR [file 41420_2023_1315_MOESM8_ESM.xlsx]

## Sheet: Sheet1
id	d7_chemo__d7_control||num	d7_chemo__d7_control||neg|p-value	d7_chemo__d7_control||neg|fdr	d7_chemo__d7_control||neg|rank	d7_chemo__d7_control||neg|goodsgrna	d7_chemo__d7_control||pos|p-value	d7_chemo__d7_control||pos|fdr	d7_chemo__d7_control||pos|rank	d7_chemo__d7_control||pos|goodsgrna	d7_chemo__d7_control||log2FoldChange
TRMT12	3	0.29732	0.996322	6050	1	5.3276e-06	0.113861	1	2	9.1497
C11orf16	1	0.99868	0.999829	21344	0	0.0013627	0.956958	68	1	9.0236
FAM208B	1	0.99693	0.999632	21312	0	0.0030884	0.956958	152	1	8.8196
APOBR	1	0.996	0.999471	21297	0	0.0039862	0.956958	196	1	8.7494
WFDC13	1	0.99597	0.999471	21296	0	0.004027	0.956958	197	1	8.7472
ARHGDIG	1	0.99563	0.999463	21285	0	0.0043387	0.956958	219	1	8.7226
MYH9	2	0.99986	0.999904	21369	0	0.00028839	0.880481	10	2	8.7127
MISP	1	0.99513	0.999463	21276	0	0.0048349	0.956958	245	1	8.664
RBMY1J	1	0.99492	0.999463	21271	0	0.0050448	0.966452	256	1	8.6415
AMH	3	0.36741	0.996322	7300	1	0.00026615	0.880481	4	2	8.5893
TEKT3	2	0.99975	0.999904	21367	0	0.00051261	0.956958	13	2	8.5594
HOXC11	1	0.99401	0.999457	21251	0	0.0059759	0.970617	304	1	8.5505
TRIM64C	1	0.99397	0.999457	21248	0	0.0060204	0.970617	308	1	8.5492
CABP5	1	0.99378	0.999457	21247	0	0.0062141	0.970617	311	1	8.5377
PGBD2	1	0.99359	0.999457	21243	0	0.0063855	0.970617	319	1	8.5287
TSPY8	1	0.99359	0.999457	21244	0	0.0063855	0.970617	320	1	8.5287
OR2AP1	3	0.81311	0.996322	17385	0	0.00041764	0.892574	9	2	8.5014
SLA	1	0.99162	0.999377	21206	0	0.0083243	0.970617	419	1	8.4709
SPATA31A3	1	0.99102	0.99926	21194	0	0.0089135	0.970617	447	1	8.452
KRTAP10-2	2	0.9999	0.999904	21372	0	0.00018925	0.880481	5	2	8.4369
HCRT	3	0.15183	0.982693	2835	1	0.0008596	0.956958	14	2	8.4259
MRPL42	1	0.98991	0.99926	21168	0	0.010034	0.970617	498	1	8.4231
TTBK1	1	0.9895	0.99926	21161	0	0.010457	0.970617	512	1	8.4134
TCP11X2	3	0.46562	0.996322	9054	1	0.0010435	0.956958	17	2	8.4064
USP35	1	0.98879	0.99926	21145	0	0.011183	0.970617	544	1	8.3951
KCNK17	1	0.98837	0.99926	21134	0	0.011587	0.970617	575	1	8.3838
PNKD	2	0.99862	0.999829	21343	0	0.0026594	0.956958	71	2	8.3623
ADCY1	1	0.98643	0.999165	21096	0	0.013486	0.972353	664	1	8.3389
hsa-mir-124-2	2	0.9997	0.999904	21366	0	0.00058071	0.956958	15	2	8.3358
ENDOD1	3	0.93491	0.996362	20053	0	0.0016268	0.956958	27	2	8.3345
PCDHA7	1	0.98572	0.999165	21077	0	0.014162	0.972765	703	1	8.3197
ITGB7	1	0.98545	0.999165	21070	0	0.014442	0.972765	721	1	8.3092
CYP3A7-CYP3AP1	1	0.98496	0.999165	21064	0	0.01495	0.972765	743	1	8.288
DOK5	1	0.9837	0.998901	21047	0	0.016244	0.972765	798	1	8.2432
TMEM240	3	0.99934	0.999829	21359	0	0.0019089	0.956958	35	3	8.2337
GNPAT	3	0.4532	0.996322	8832	1	0.002431	0.956958	44	2	8.205
SCN11A	2	0.9975	0.999632	21324	0	0.0047728	0.956958	122	2	8.1979
MS4A2	3	0.95607	0.997574	20463	0	0.002481	0.956958	45	2	8.1953
MYO9A	3	0.98202	0.998847	21011	0	0.0025241	0.956958	47	3	8.1887
PLA2R1	3	0.88048	0.996322	18811	0	0.0025853	0.956958	49	2	8.1806
ZNF684	3	0.41948	0.996322	8227	1	0.0026172	0.956958	50	2	8.1756
KRTAP10-12	1	0.98228	0.998901	21015	0	0.017749	0.972765	864	1	8.1624
TBCK	2	0.99946	0.999829	21362	0	0.0010463	0.956958	25	2	8.0989
AP4E1	1	0.98136	0.998797	20999	0	0.018634	0.972765	897	1	8.0926
CCDC91	3	0.55359	0.996322	10853	1	0.0029777	0.956958	55	2	8.0874
ERCC1	2	0.99901	0.999829	21351	0	0.0018709	0.956958	52	2	8.0821
CDK5R1	1	0.98087	0.998643	20992	0	0.019122	0.972765	914	1	8.068
ZNF524	3	0.63662	0.996322	13182	1	0.0031217	0.956958	57	2	8.0429
TNFRSF1A	3	0.9976	0.999632	21326	0	0.0033506	0.956958	60	3	8.0303
SLCO4C1	2	0.99776	0.999632	21331	0	0.0042984	0.956958	110	2	8.0241
ZNF284	1	0.97974	0.998361	20972	0	0.020284	0.972765	961	1	8.0211
C11orf88	3	0.60922	0.996322	12468	1	0.0035139	0.956958	63	2	8.0138
LOC100130451	3	0.99892	0.999829	21350	0	0.0031023	0.956958	56	3	8.0064
SLC17A9	3	0.99947	0.999829	21364	0	0.0015235	0.956958	22	3	7.9934
C2orf80	3	0.46781	0.996322	9079	1	0.0038426	0.956958	69	2	7.9859
MMP21	3	0.9945	0.999457	21263	0	0.0038986	0.956958	72	3	7.9821
C22orf23	3	0.96343	0.997574	20617	0	0.0039834	0.956958	74	2	7.9783
PDCD7	3	0.15292	0.982693	2859	1	0.0042012	0.956958	79	2	7.9689
DVL3	3	0.88749	0.996322	18981	0	0.0043448	0.956958	81	2	7.9651
SNX4	3	0.66825	0.996322	13945	1	0.0010741	0.956958	18	2	7.9651
HIST1H2BI	1	0.97684	0.998121	20916	0	0.023125	0.972765	1074	1	7.9593
CPEB4	3	0.99932	0.999829	21358	0	0.001964	0.956958	36	3	7.9555
hsa-mir-613	3	0.50135	0.996322	9693	1	0.0046427	0.956958	85	2	7.9536
ZNF281	2	0.9961	0.999471	21301	0	0.007514	0.970617	185	2	7.9523
POLR2L	1	0.97591	0.998121	20890	0	0.024024	0.972765	1119	1	7.9478
UBE2A	2	0.99916	0.999829	21354	0	0.0016092	0.956958	42	2	7.9449
TRPV4	3	0.29345	0.996322	5965	1	0.0049558	0.966452	93	2	7.944
POTEI	1	0.9755	0.998121	20880	0	0.02441	0.972765	1139	1	7.942
GPR149	3	0.95186	0.997574	20376	0	0.0052162	0.970617	95	2	7.9362
KIAA1462	3	0.61686	0.996322	12668	1	0.0052653	0.970617	97	2	7.9343
SLC38A10	3	0.92837	0.996322	19902	0	0.0055284	0.970617	98	2	7.9265
KPNB1	1	0.97404	0.998121	20851	0	0.025925	0.972765	1194	1	7.9245
COMMD4	3	0.74822	0.996322	15926	1	0.0057383	0.970617	101	2	7.9206
hsa-mir-1246	3	0.9976	0.999632	21327	0	0.005792	0.970617	103	3	7.9186
FGFR4	3	0.99947	0.999829	21363	0	0.0015235	0.956958	23	3	7.9127
CT47B1	2	0.9983	0.99982	21340	0	0.0032459	0.956958	88	2	7.9108
FAM200A	1	0.97278	0.998121	20821	0	0.02716	0.972765	1243	1	7.9107
PACRGL	1	0.97238	0.998121	20817	0	0.027571	0.972765	1261	1	7.9068
SMIM20	1	0.97222	0.998121	20813	0	0.027726	0.972765	1267	1	7.9048
WWTR1	3	0.7886	0.996322	16852	1	0.0064221	0.970617	115	2	7.9028
CIT	3	0.93062	0.996322	19955	0	0.0065337	0.970617	118	2	7.9008
PKLR	3	0.69373	0.996322	14575	1	0.0068937	0.970617	125	2	7.8928
TMEFF2	1	0.97006	0.998121	20767	0	0.029958	0.972765	1348	1	7.8848
SUCLG2	3	0.23226	0.991964	4611	1	0.0074663	0.970617	134	2	7.8827
hsa-mir-4261	3	0.86647	0.996322	18510	0	0.0075742	0.970617	136	2	7.8807
SPATA6	1	0.96965	0.998121	20760	0	0.030318	0.972765	1364	1	7.8807
B4GALNT4	3	0.99576	0.999463	21288	0	0.0077211	0.970617	139	3	7.8787
NR4A2	3	0.56469	0.996322	11172	1	0.0078489	0.970617	143	2	7.8767
CCAR1	1	0.9683	0.997574	20744	0	0.031733	0.972765	1407	1	7.8706
FUT1	3	0.99867	0.999829	21345	0	0.0038092	0.956958	67	3	7.8686
PRICKLE2	1	0.96803	0.997574	20733	0	0.032023	0.972765	1424	1	7.8686
SPANXN4	1	0.96803	0.997574	20734	0	0.032023	0.972765	1423	1	7.8686
C20orf195	2	0.99883	0.999829	21348	0	0.0022397	0.956958	59	2	7.8644
ARL17B	1	0.96708	0.997574	20711	0	0.032991	0.972765	1453	1	7.8604
HHATL	1	0.96676	0.997574	20704	0	0.033341	0.972765	1467	1	7.8563
SLC41A3	3	0.9951	0.999463	21273	0	0.0091929	0.970617	161	3	7.8542
YIF1B	1	0.96635	0.997574	20697	0	0.033759	0.972765	1473	1	7.8522
RBFOX1	3	0.96232	0.997574	20592	0	0.0094171	0.970617	164	2	7.8501
SFRP4	3	0.98891	0.99926	21146	0	0.0094171	0.970617	163	3	7.8501
hsa-mir-578	3	0.58001	0.996322	11641	1	0.0097205	0.970617	167	2	7.846
PXDN	1	0.9653	0.997574	20669	0	0.034845	0.972765	1500	1	7.8439
GOLGA6L6	1	0.96503	0.997574	20658	0	0.035091	0.972765	1512	1	7.8418
EIF4G1	1	0.9647	0.997574	20652	0	0.035398	0.972765	1518	1	7.8377
GADL1	3	0.75328	0.996322	16035	1	0.010188	0.970617	177	2	7.8377
CLDND2	3	0.63662	0.996322	13174	1	0.010386	0.970617	180	2	7.8335
PRRG3	3	0.53747	0.996322	10443	1	0.0081802	0.970617	145	2	7.8314
PSMB2	3	0.96646	0.997574	20702	0	0.010496	0.970617	182	2	7.8314
KLRC4-KLRK1	1	0.9639	0.997574	20628	0	0.036185	0.972765	1548	1	7.8293
HIST1H3E	3	0.93347	0.996322	20022	0	0.01081	0.970617	188	2	7.8272
SYT6	3	0.99986	0.999904	21370	0	0.00040606	0.892574	8	3	7.8272
ACE2	3	0.81791	0.996322	17486	0	0.011005	0.970617	192	2	7.8251
HIST1H3C	3	0.8693	0.996322	18570	0	0.011161	0.970617	195	2	7.823
LY75-CD302	1	0.96301	0.997574	20607	0	0.03709	0.972765	1569	1	7.823
TACC1	3	0.99832	0.99982	21339	0	0.0047877	0.956958	89	3	7.8209
KIAA1704	2	0.99746	0.999632	21321	0	0.0048358	0.956958	127	2	7.8179
PCBD1	3	0.97629	0.998121	20898	0	0.011552	0.970617	201	3	7.8146
PREPL	3	0.67352	0.996322	14071	1	0.011552	0.970617	202	2	7.8146
SMAD7	1	0.96212	0.997574	20586	0	0.038003	0.972765	1596	1	7.8125
ALX3	3	0.99684	0.999632	21310	0	0.0088964	0.970617	155	3	7.8104
CCNI2	3	0.54722	0.996322	10670	1	0.011884	0.970617	212	2	7.8104
ID4	3	0.9579	0.997574	20498	0	0.011884	0.970617	211	2	7.8104
ZFYVE21	3	0.18502	0.984333	3512	1	0.011884	0.970617	213	2	7.8104
CLEC18C	1	0.9613	0.997574	20564	0	0.038808	0.972765	1629	1	7.804
GRAPL	2	0.99791	0.999632	21336	0	0.0040158	0.956958	104	2	7.8033
SIDT1	3	0.79977	0.996322	17118	1	0.012302	0.970617	222	2	7.8019
FRAS1	3	0.97513	0.998121	20874	0	0.01259	0.970617	226	3	7.7976
RNF44	1	0.96069	0.997574	20548	0	0.039419	0.972765	1652	1	7.7976
WHSC1	3	0.8838	0.996322	18893	0	0.01259	0.970617	225	2	7.7976
HOXA1	2	0.9978	0.999632	21333	0	0.0042322	0.956958	108	2	7.7963
DPP6	3	0.80546	0.996322	17226	1	0.012736	0.970617	230	2	7.7954
DOPEY1	1	0.96028	0.997574	20543	0	0.039805	0.972765	1668	1	7.7933
LGALS14	3	0.96644	0.997574	20700	0	0.013192	0.970617	239	2	7.7868
R3HDML	3	0.14849	0.98122	2769	1	0.013192	0.970617	240	2	7.7868
ALOX12	3	0.98681	0.999165	21106	0	0.013352	0.970617	242	3	7.7825
CTAGE9	3	0.85475	0.996322	18272	0	0.013352	0.970617	243	2	7.7825
FNBP4	3	0.66234	0.996322	13799	1	0.013352	0.970617	241	2	7.7825
MAP2K1	3	0.54944	0.996322	10740	1	0.013505	0.972353	244	2	7.7804
KMT2C	1	0.95893	0.997574	20521	0	0.041173	0.972765	1713	1	7.7782
PLCD1	3	0.94698	0.997237	20295	0	0.013692	0.972353	250	2	7.7782
LOC643802	3	0.49449	0.996322	9581	1	0.0139	0.972765	254	2	7.776
TRPM8	1	0.95834	0.997574	20511	0	0.041794	0.972765	1729	1	7.7739
hsa-mir-550a-2	1	0.95805	0.997574	20503	0	0.042082	0.972765	1737	1	7.7695
TESPA1	3	0.79709	0.996322	17055	1	0.01427	0.972765	258	2	7.7695
CINP	1	0.95784	0.997574	20496	0	0.042294	0.972765	1748	1	7.7673
KIAA1217	3	0.24392	0.993219	4858	1	0.014419	0.972765	262	2	7.7673
OR1S2	1	0.95784	0.997574	20495	0	0.042294	0.972765	1747	1	7.7673
TSSK6	3	0.7168	0.996322	15159	1	0.014578	0.972765	264	2	7.7651
RGS18	1	0.95698	0.997574	20480	0	0.043149	0.972765	1769	1	7.7585
TMA7	1	0.95698	0.997574	20481	0	0.043149	0.972765	1768	1	7.7585
BZW1	3	0.98466	0.999165	21059	0	0.015091	0.972765	271	3	7.7563
RAB39B	3	0.54944	0.996322	10744	1	0.015091	0.972765	270	2	7.7563
LILRA5	3	0.91449	0.996322	19583	0	0.01524	0.972765	275	2	7.7541
PSMB11	2	0.998	0.999632	21337	0	0.0038449	0.956958	99	2	7.753
hsa-mir-1910	3	0.63475	0.996322	13128	1	0.015485	0.972765	280	2	7.7497
hsa-mir-4671	2	0.99772	0.999632	21329	0	0.0043791	0.956958	114	2	7.7478
BSN	1	0.9559	0.997574	20461	0	0.044179	0.972765	1802	1	7.7475
ITGA1	1	0.9559	0.997574	20460	0	0.044179	0.972765	1801	1	7.7475
SEMA4F	3	0.99977	0.999904	21368	0	0.00067197	0.956958	11	3	7.7386
CABP1	1	0.95503	0.997574	20447	0	0.045062	0.972765	1827	1	7.7364
CTLA4	3	0.69477	0.996322	14595	1	0.016196	0.972765	292	2	7.7364
RBM44	3	0.79079	0.996322	16907	1	0.016196	0.972765	293	2	7.7364
SIRPD	2	0.99737	0.999632	21320	0	0.0050262	0.966452	128	2	7.7353
hsa-mir-562	3	0.93383	0.996322	20028	0	0.016337	0.972765	300	2	7.7342
RPL22	3	0.91466	0.996322	19590	0	0.016337	0.972765	299	2	7.7342
GAD2	3	0.87579	0.996322	18697	0	0.016491	0.972765	303	2	7.7319
YWHAH	3	0.99779	0.999632	21330	0	0.0062331	0.970617	111	3	7.7319
FASTKD3	3	0.9488	0.997574	20325	0	0.016754	0.972765	309	2	7.7252
GNL2	3	0.99549	0.999463	21279	0	0.012762	0.970617	232	3	7.7207
MED7	2	0.98634	0.999165	21087	0	0.020038	0.972765	516	2	7.7066
KIAA0586	1	0.953	0.997574	20410	0	0.047176	0.981813	1885	1	7.7048
FCGR3B	3	0.21988	0.988835	4315	1	0.017695	0.972765	325	2	7.7025
TMC6	1	0.95277	0.997574	20403	0	0.047407	0.981813	1899	1	7.7002
TRMT10B	3	0.8732	0.996322	18643	0	0.018635	0.972765	342	2	7.6818
KANK4	3	0.97023	0.998121	20773	0	0.018745	0.972765	346	3	7.6795
RESP18	3	0.65609	0.996322	13652	1	0.018745	0.972765	345	2	7.6795
ZNF813	1	0.95149	0.997574	20371	0	0.04873	0.98809	1934	1	7.6795
NLRP9	3	0.54314	0.996322	10575	1	0.018853	0.972765	349	2	7.6772
SBF1	3	0.94919	0.997574	20334	0	0.019043	0.972765	355	2	7.6725
LGALS9C	2	0.97729	0.998191	20924	0	0.012163	0.970617	317	2	7.6649
PRSS50	3	0.8445	0.996322	18045	0	0.019325	0.972765	362	2	7.6631
UBA3	3	0.61994	0.996322	12743	1	0.01941	0.972765	363	2	7.6608
PPP1R2	3	0.32836	0.996322	6585	1	0.019827	0.972765	371	2	7.649
TET1	3	0.79164	0.996322	16929	1	0.019827	0.972765	370	2	7.649
hsa-mir-588	2	0.99605	0.999471	21299	0	0.0076326	0.970617	189	2	7.6477
OR4C6	3	0.96918	0.998083	20753	0	0.019968	0.972765	372	3	7.6466
TMEM190	3	0.99641	0.999494	21305	0	0.010112	0.970617	174	3	7.6466
hsa-mir-587	4	0.80373	0.996322	16589	1	0.0023527	0.956958	31	3	7.642
CSK	3	0.99109	0.99926	21191	0	0.020064	0.972765	375	3	7.6418
F8A3	1	0.94972	0.997574	20342	0	0.050559	0.988529	1980	1	7.6418
RNF6	3	0.68114	0.996322	14268	1	0.020064	0.972765	376	2	7.6418
BCL6B	3	0.98341	0.998901	21036	0	0.020173	0.972765	379	3	7.6395
CLIP3	2	0.99448	0.999457	21266	0	0.010621	0.970617	273	2	7.6369
hsa-mir-8059	1	0.94928	0.997574	20335	0	0.050976	0.988529	1995	1	7.6347
hsa-mir-1278	2	0.98425	0.999025	21056	0	0.026618	0.972765	702	2	7.6323
SYDE2	1	0.94894	0.997574	20327	0	0.051331	0.988529	2006	1	7.6226
OR4K17	1	0.94867	0.997574	20322	0	0.051599	0.988529	2013	1	7.6154
GML	3	0.98678	0.999165	21101	0	0.020984	0.972765	389	3	7.6105
FTSJ3	1	0.9484	0.997574	20313	0	0.051856	0.988529	2022	1	7.6081
ZNF599	2	0.99117	0.99926	21197	0	0.016755	0.972765	439	2	7.6043
CELSR1	2	0.9972	0.999632	21314	0	0.0053612	0.970617	138	2	7.5935
RIF1	2	0.98609	0.999165	21081	0	0.026287	0.972765	693	2	7.5924
NXN	2	0.98323	0.998901	21032	0	0.031356	0.972765	826	2	7.5911
ORM1	3	0.53747	0.996322	10439	1	0.021623	0.972765	397	2	7.5909
UHRF1BP1	2	0.97485	0.998121	20865	0	0.0069845	0.970617	169	2	7.5864
RUSC2	3	0.99002	0.99926	21167	0	0.021815	0.972765	400	3	7.5835
CBLN2	2	0.99007	0.99926	21171	0	0.018818	0.972765	492	2	7.5771
ZFPM2	2	0.98323	0.998901	21031	0	0.031356	0.972765	825	2	7.5724
ZNF226	3	0.82404	0.996322	17625	0	0.022221	0.972765	408	2	7.566
MCM10	1	0.94677	0.997216	20287	0	0.053456	0.990448	2062	1	7.5635
PRHOXNB	3	0.94458	0.997045	20244	0	0.022365	0.972765	414	2	7.561
RPLP1	3	0.56006	0.996322	11030	1	0.022481	0.972765	416	2	7.5559
PAPOLA	2	0.98634	0.999165	21090	0	0.025869	0.972765	677	2	7.5552
ITIH6	3	0.82698	0.996322	17700	0	0.022589	0.972765	420	2	7.5508
C11orf30	1	0.9463	0.997216	20278	0	0.053897	0.990448	2075	1	7.5483
DCAKD	3	0.88668	0.996322	18960	0	0.022686	0.972765	422	2	7.5458
C7orf55-LUC7L2	1	0.94617	0.997216	20275	0	0.054039	0.990448	2085	1	7.5432
HAS3	1	0.94617	0.997216	20276	0	0.054039	0.990448	2084	1	7.5432
GLOD4	2	0.98968	0.99926	21164	0	0.019538	0.972765	506	2	7.5418
RAB11FIP4	1	0.94592	0.997216	20268	0	0.054261	0.990448	2090	1	7.5381
ANK3	3	0.99016	0.99926	21170	0	0.023145	0.972765	425	3	7.533
EFCAB5	2	0.98499	0.999165	21062	0	0.028322	0.972765	747	2	7.5324
GLB1L2	3	0.9489	0.997574	20329	0	0.023229	0.972765	427	2	7.5304
hsa-mir-20b	3	0.99625	0.999476	21302	0	0.010572	0.970617	184	3	7.5304
MYH4	3	0.55157	0.996322	10799	1	0.023323	0.972765	429	2	7.5278
hsa-mir-6736	2	0.97999	0.998361	20975	0	0.037221	0.972765	957	2	7.5235
KLHL1	3	0.55157	0.996322	10800	1	0.02348	0.972765	432	2	7.52
ANP32B	3	0.98609	0.999165	21079	0	0.023695	0.972765	437	3	7.5122
GPR97	3	0.66486	0.996322	13868	1	0.023695	0.972765	438	2	7.5122
LGALS12	3	0.99419	0.999457	21257	0	0.011999	0.970617	214	3	7.507
PET100	3	0.90217	0.996322	19291	0	0.023958	0.972765	446	2	7.4965
OCSTAMP	2	0.97644	0.998121	20901	0	0.023041	0.972765	603	2	7.4952
FAM171A1	3	0.99754	0.999632	21322	0	0.0068784	0.970617	124	3	7.4833
RND1	1	0.94415	0.997015	20234	0	0.05603	0.994322	2150	1	7.4726
GPR160	2	0.99625	0.999476	21303	0	0.007217	0.970617	179	2	7.4709
C18orf32	2	0.98102	0.998727	20993	0	0.035375	0.972765	911	2	7.4706
LYPD5	3	0.67376	0.996322	14076	1	0.02444	0.972765	452	2	7.4699
LNX1	3	0.99917	0.999829	21355	0	0.0023708	0.956958	40	3	7.4672
GPAM	3	0.30454	0.996322	6163	1	0.024634	0.972765	459	2	7.4645
KLHL12	3	0.98236	0.998901	21016	0	0.024634	0.972765	460	3	7.4645
CATSPER3	2	0.99545	0.999463	21281	0	0.0087838	0.970617	224	2	7.4639
TMBIM1	3	0.83812	0.996322	17926	0	0.024711	0.972765	464	2	7.4618
ACSS1	2	0.99137	0.999276	21203	0	0.016377	0.972765	426	2	7.4574
C12orf65	3	0.92026	0.996322	19724	0	0.025	0.972765	467	2	7.4455
FOXR2	2	0.99574	0.999463	21292	0	0.0082362	0.970617	204	2	7.4453
CA4	2	0.98567	0.999165	21074	0	0.02706	0.972765	714	2	7.445
PVRL4	2	0.99474	0.999463	21270	0	0.010088	0.970617	261	2	7.4373
MIB2	2	0.99117	0.99926	21198	0	0.016755	0.972765	442	2	7.433
IL33	2	0.99502	0.999463	21275	0	0.0095918	0.970617	246	2	7.4317
KBTBD11	2	0.99438	0.999457	21261	0	0.010819	0.970617	278	2	7.4298
MOSPD1	2	0.99631	0.999494	21304	0	0.0070989	0.970617	175	2	7.4196
FRRS1L	1	0.94285	0.996775	20212	0	0.057348	0.994322	2184	1	7.4152
ZNF677	2	0.98567	0.999165	21075	0	0.02706	0.972765	712	2	7.4114
FRS3	2	0.97879	0.998361	20948	0	0.039405	0.972765	1007	2	7.408
NOP10	2	0.99322	0.999457	21234	0	0.01303	0.970617	340	2	7.4076
HLA-E	3	0.8041	0.996322	17204	1	0.025669	0.972765	474	2	7.404
ATXN1L	2	0.99448	0.999457	21267	0	0.010621	0.970617	272	2	7.4028
hsa-mir-3675	4	0.87207	0.996322	18606	1	0.01097	0.970617	150	3	7.3961
BRAF	2	0.9908	0.99926	21186	0	0.017423	0.972765	462	2	7.3931
DGKK	2	0.97574	0.998121	20884	0	0.039603	0.972765	1010	2	7.3914
DCUN1D5	2	0.99556	0.999463	21283	0	0.0085767	0.970617	221	2	7.3832
NT5DC3	2	0.99408	0.999457	21256	0	0.01141	0.970617	295	2	7.3825
VPS25	2	0.99574	0.999463	21294	0	0.0082362	0.970617	206	2	7.3745
S100A9	1	0.94212	0.996752	20196	0	0.058121	0.994322	2212	1	7.367
ITM2A	2	0.98675	0.999165	21104	0	0.025026	0.972765	648	2	7.3617
hsa-mir-1-2	2	0.98675	0.999165	21102	0	0.025026	0.972765	647	2	7.3577
E2F1	2	0.99398	0.999457	21250	0	0.011607	0.970617	306	2	7.3478
ZFYVE16	3	0.21379	0.987402	4151	1	0.026419	0.972765	488	2	7.3437
ISG20	2	0.99175	0.999377	21209	0	0.015688	0.972765	411	2	7.3385
TNFRSF25	3	0.90758	0.996322	19415	0	0.026491	0.972765	490	2	7.3378
EPS8L3	3	0.89892	0.996322	19222	0	0.026541	0.972765	491	2	7.3319
FAM96A	2	0.98249	0.998901	21017	0	0.032663	0.972765	861	2	7.3159
hsa-mir-8065	4	0.91006	0.996322	19473	0	0.019939	0.972765	287	3	7.3148
PEX11A	2	0.98871	0.99926	21142	0	0.021361	0.972765	550	2	7.3124
hsa-mir-1251	4	0.48898	0.996322	8984	1	0.0057698	0.970617	82	3	7.3115
RCSD1	1	0.94135	0.996752	20178	0	0.05888	0.994322	2236	1	7.3051
SLC22A15	3	0.9669	0.997574	20709	0	0.026773	0.972765	494	2	7.2991
PRMT10	2	0.98545	0.999165	21069	0	0.027486	0.972765	727	2	7.2967
UBXN4	2	0.99156	0.999377	21205	0	0.01602	0.972765	423	2	7.2962
ZNF623	2	0.98304	0.998901	21028	0	0.031676	0.972765	832	2	7.2924
ZNF527	2	0.99408	0.999457	21255	0	0.01141	0.970617	296	2	7.2914
GRIN3A	2	0.99117	0.99926	21195	0	0.016755	0.972765	440	2	7.2853
RTEL1	2	0.98634	0.999165	21089	0	0.025869	0.972765	675	2	7.2849
CDON	2	0.99574	0.999463	21293	0	0.0082362	0.970617	205	2	7.2844
GTF3C6	3	0.98921	0.99926	21156	0	0.026972	0.972765	497	3	7.2808
GTPBP10	2	0.97933	0.998361	20960	0	0.03844	0.972765	984	2	7.2785
hsa-mir-556	2	0.98567	0.999165	21073	0	0.02706	0.972765	713	2	7.2752
MCM6	1	0.94104	0.996752	20174	0	0.059176	0.994322	2241	1	7.2747
TPRN	3	0.8521	0.996322	18212	0	0.027019	0.972765	499	2	7.2747
hsa-mir-1248	2	0.99257	0.999457	21223	0	0.014212	0.972765	380	2	7.2641
FAM170A	2	0.97999	0.998361	20974	0	0.037221	0.972765	955	2	7.2557
ADSSL1	2	0.98786	0.99926	21122	0	0.022962	0.972765	599	2	7.2502
TMEM66	2	0.98871	0.99926	21143	0	0.021361	0.972765	549	2	7.2467
TMPRSS5	2	0.97332	0.998121	20826	0	0.025295	0.972765	658	2	7.2416
BTBD16	2	0.99322	0.999457	21235	0	0.01303	0.970617	339	2	7.2355
PHKG1	2	0.98154	0.998829	21001	0	0.034399	0.972765	895	2	7.2339
ADAM30	2	0.97921	0.998361	20957	0	0.038651	0.972765	991	2	7.23
KRT82	2	0.99028	0.99926	21175	0	0.018441	0.972765	481	2	7.2296
TSPAN16	2	0.99408	0.999457	21254	0	0.01141	0.970617	294	2	7.2174
MRC1	1	0.94059	0.996748	20161	0	0.059648	0.994322	2257	1	7.2086
SLC7A6OS	2	0.97738	0.998213	20925	0	0.042069	0.972765	1057	2	7.1967
SPAG7	3	0.99667	0.999632	21307	0	0.0094032	0.970617	162	3	7.1957
hsa-mir-149	3	0.57169	0.996322	11389	1	0.02759	0.972765	505	2	7.1925
WFDC5	2	0.98764	0.99926	21120	0	0.023346	0.972765	609	2	7.191
hsa-mir-6743	2	0.97667	0.998121	20907	0	0.043315	0.972765	1092	2	7.1824
MTFP1	1	0.94016	0.996737	20156	0	0.060095	0.994322	2271	1	7.1794
CD160	2	0.97982	0.998361	20971	0	0.03753	0.972765	962	2	7.177
C7orf65	3	0.99856	0.999829	21342	0	0.0040992	0.956958	77	3	7.1728
DECR1	2	0.98895	0.99926	21150	0	0.020904	0.972765	534	2	7.1712
ZNF565	1	0.93994	0.996692	20147	0	0.060302	0.994322	2278	1	7.1695
hsa-mir-4528	2	0.97933	0.998361	20961	0	0.03844	0.972765	983	2	7.1685
SULT1E1	3	0.36741	0.996322	7301	1	0.027988	0.972765	509	2	7.1662
hsa-mir-1200	4	0.97331	0.998121	20831	0	0.031856	0.972765	471	3	7.1646
PPFIA4	2	0.97702	0.998121	20918	0	0.042685	0.972765	1071	2	7.1604
SAMD12	1	0.93981	0.996692	20141	0	0.060445	0.994322	2284	1	7.1562
MRPL9	1	0.93969	0.996692	20139	0	0.060573	0.994322	2287	1	7.1495
DGKA	3	0.99911	0.999829	21353	0	0.0025186	0.956958	46	3	7.1428
WDR34	2	0.97847	0.998361	20941	0	0.040014	0.972765	1021	2	7.1409
RELL1	3	0.94714	0.997294	20297	0	0.010775	0.970617	186	2	7.1394
FAP	2	0.97488	0.998121	20866	0	0.046472	0.981813	1164	2	7.1367
RABEP1	3	0.93237	0.996322	19992	0	0.028432	0.972765	517	2	7.136
SMIM5	2	0.9956	0.999463	21286	0	0.0085045	0.970617	217	2	7.1329
GYPC	3	0.73843	0.996322	15679	1	0.028787	0.972765	522	2	7.1224
SWAP70	1	0.93902	0.996692	20128	0	0.061241	0.994322	2307	1	7.1224
XPA	2	0.99175	0.999377	21208	0	0.015688	0.972765	409	2	7.1201
TUBD1	1	0.94097	0.996752	20172	0	0.059259	0.994322	2242	1	7.1057
FAM217A	3	0.86398	0.996322	18451	0	0.029296	0.972765	529	2	7.1052
SPATA17	2	0.97364	0.998121	20838	0	0.048662	0.98809	1215	2	7.1012
C15orf56	2	0.97245	0.998121	20815	0	0.042983	0.972765	1082	2	7.1
RGS22	3	0.75764	0.996322	16133	1	0.029621	0.972765	536	2	7.0948
FLG	2	0.97409	0.998121	20849	0	0.010819	0.970617	277	2	7.093
EBPL	1	0.93781	0.996611	20108	0	0.062426	0.994322	2334	1	7.0879
OARD1	3	0.92484	0.996322	19827	0	0.029854	0.972765	542	2	7.0879
CMTM7	3	0.9667	0.997574	20706	0	0.029985	0.972765	545	2	7.0844
CCDC39	3	0.62645	0.996322	12912	1	0.030157	0.972765	551	2	7.0808
HDAC5	1	0.93745	0.996581	20100	0	0.062744	0.994322	2345	1	7.0808
KEL	3	0.73549	0.996322	15603	1	0.030157	0.972765	553	2	7.0808
MRPS24	3	0.90113	0.996322	19276	0	0.030157	0.972765	552	2	7.0808
ZSWIM2	2	0.97941	0.998361	20963	0	0.038286	0.972765	981	2	7.0806
MRPL32	3	0.88763	0.996322	18984	0	0.030331	0.972765	558	2	7.0773
PXK	3	0.61297	0.996322	12569	1	0.030331	0.972765	559	2	7.0773
CCRL1	3	0.33032	0.996322	6608	1	0.030509	0.972765	565	2	7.0738
SERPINA12	3	0.54722	0.996322	10679	1	0.030703	0.972765	568	2	7.0703
SOGA3	3	0.98298	0.998901	21025	0	0.030703	0.972765	567	3	7.0703
CEP152	3	0.99549	0.999463	21280	0	0.012752	0.970617	231	3	7.0667
OLIG1	3	0.87262	0.996322	18632	0	0.030944	0.972765	574	2	7.0667
MTG2	1	0.93622	0.996379	20076	0	0.064009	0.994322	2374	1	7.0631
TRPT1	3	0.98264	0.998901	21019	0	0.031222	0.972765	579	3	7.0631
EFCC1	3	0.71622	0.996322	15150	1	0.031501	0.972765	588	2	7.0596
KBTBD3	3	0.88656	0.996322	18959	0	0.031501	0.972765	587	2	7.0596
METTL18	1	0.93568	0.996379	20064	0	0.064572	0.994322	2388	1	7.056
SOX11	3	0.99588	0.999471	21295	0	0.011579	0.970617	203	3	7.0524
ESX1	3	0.7149	0.996322	15122	1	0.032342	0.972765	602	2	7.0488
ANG	2	0.99048	0.99926	21180	0	0.01805	0.972765	472	2	7.0477
GPR180	3	0.52938	0.996322	10256	1	0.032718	0.972765	608	2	7.0452
PTBP3	3	0.99917	0.999829	21356	0	0.0023708	0.956958	41	3	7.0452
SESN2	3	0.39928	0.996322	7860	1	0.032718	0.972765	606	2	7.0452
SOX14	3	0.5695	0.996322	11301	1	0.032718	0.972765	607	2	7.0452
HS3ST4	3	0.67241	0.996322	14052	1	0.033018	0.972765	613	2	7.0416
LOC100506388	1	0.93425	0.996322	20036	0	0.066017	0.994322	2433	1	7.0416
MRPL53	3	0.91648	0.996322	19626	0	0.033018	0.972765	612	2	7.0416
COL6A6	3	0.81126	0.996322	17346	0	0.033278	0.972765	616	2	7.038
ZNHIT2	3	0.82282	0.996322	17596	0	0.033278	0.972765	615	2	7.038
CSRP2BP	3	0.90856	0.996322	19440	0	0.033547	0.972765	619	2	7.0344
GPR146	1	0.93369	0.996322	20024	0	0.0666	0.994322	2454	1	7.0344
STT3A	3	0.63799	0.996322	13210	1	0.033547	0.972765	620	2	7.0344
AP2A2	3	0.99756	0.999632	21325	0	0.0068131	0.970617	120	3	7.0308
BIVM	3	0.46781	0.996322	9077	1	0.00073729	0.956958	12	2	7.0308
hsa-mir-548aj-1	1	0.93284	0.996322	20002	0	0.0674	0.994322	2483	1	7.0271
hsa-mir-5571	3	0.97664	0.998121	20909	0	0.0037374	0.956958	65	3	7.0271
KIAA1161	3	0.28467	0.994862	5776	1	0.034329	0.972765	633	2	7.0271
OSBPL11	3	0.91274	0.996322	19537	0	0.034329	0.972765	635	2	7.0271
ZNF878	3	0.44425	0.996322	8667	1	0.034329	0.972765	634	2	7.0271
SLC32A1	3	0.9995	0.999829	21365	0	0.001441	0.956958	20	3	7.0235
ANXA9	3	0.99867	0.999829	21346	0	0.0038092	0.956958	66	3	7.0198
CALCA	3	0.39153	0.996322	7722	1	0.035337	0.972765	652	2	7.0198
CBX3	1	0.93178	0.996322	19978	0	0.068426	0.994322	2514	1	7.0198
CD86	3	0.75443	0.996322	16070	1	0.035337	0.972765	653	2	7.0198
FETUB	3	0.40213	0.996322	7913	1	0.035337	0.972765	654	2	7.0198
hsa-mir-1203	1	0.93178	0.996322	19976	0	0.068426	0.994322	2515	1	7.0198
LYZL4	3	0.66735	0.996322	13922	1	0.035337	0.972765	651	2	7.0198
OR14I1	3	0.85141	0.996322	18195	0	0.035337	0.972765	650	2	7.0198
DIO3	3	0.88242	0.996322	18858	0	0.035902	0.972765	666	2	7.0161
MSL3	1	0.93073	0.996322	19954	0	0.069536	0.994322	2542	1	7.0124
MTHFD2	3	0.63998	0.996322	13263	1	0.036364	0.972765	680	2	7.0124
TBXAS1	3	0.3384	0.996322	6772	1	0.036364	0.972765	679	2	7.0124
TFB2M	3	0.83756	0.996322	17916	0	0.036364	0.972765	678	2	7.0124
DEFB134	3	0.99429	0.999457	21258	0	0.015939	0.972765	290	3	7.0087
GABRA4	3	0.99164	0.999377	21204	0	0.02282	0.972765	424	3	7.0087
hsa-mir-892c	3	0.79212	0.996322	16937	1	0.036799	0.972765	688	2	7.0087
KPNA2	3	0.18863	0.984333	3605	1	0.036799	0.972765	690	2	7.0087
LRP3	3	0.99791	0.999632	21334	0	0.0059055	0.970617	106	3	7.0087
LYPLA1	3	0.78816	0.996322	16843	1	0.036799	0.972765	689	2	7.0087
OTUD4	3	0.97306	0.998121	20824	0	0.036799	0.972765	687	3	7.0087
SPATA21	1	0.93029	0.996322	19944	0	0.069961	0.994322	2551	1	7.0087
TIPARP	3	0.93456	0.996342	20044	0	0.036799	0.972765	691	2	7.0087
ERF	3	0.12106	0.976462	2248	1	0.037217	0.972765	697	2	7.005
OR5B12	3	0.63662	0.996322	13177	1	0.037217	0.972765	699	2	7.005
SMURF1	3	0.99684	0.999632	21311	0	0.0088964	0.970617	154	3	7.005
TAF10	3	0.58433	0.996322	11763	1	0.037217	0.972765	698	2	7.005
ALS2CR11	1	0.92932	0.996322	19920	0	0.070958	0.994322	2585	1	7.0013
AZI1	3	0.58433	0.996322	11766	1	0.017519	0.972765	321	2	7.0013
COPS7B	3	0.63662	0.996322	13176	1	0.037765	0.972765	705	2	7.0013
OR1D2	1	0.92932	0.996322	19921	0	0.070958	0.994322	2584	1	7.0013
B3GALNT1	3	0.96508	0.997574	20666	0	0.038492	0.972765	722	2	6.9976
CALHM2	3	0.98046	0.998545	20985	0	0.038492	0.972765	725	3	6.9976
hsa-mir-4745	3	0.46051	0.996322	8948	1	0.038492	0.972765	724	2	6.9976
SFRP2	3	0.79155	0.996322	16927	1	0.038492	0.972765	723	2	6.9976
SEMA4A	2	0.99307	0.999457	21232	0	0.013299	0.970617	350	2	6.9964
SMDT1	2	0.9752	0.998121	20872	0	0.045903	0.978399	1154	2	6.9963
CLECL1	3	0.6458	0.996322	13410	1	0.039083	0.972765	735	2	6.9939
FBP2	3	0.9958	0.999463	21290	0	0.011823	0.970617	209	3	6.9939
NFYB	3	0.70798	0.996322	14913	1	0.039083	0.972765	736	2	6.9939
PXDC1	3	0.42726	0.996322	8383	1	0.039083	0.972765	737	2	6.9939
APPBP2	3	0.87338	0.996322	18650	0	0.039718	0.972765	748	2	6.9901
ARHGEF7	3	0.92372	0.996322	19808	0	0.039718	0.972765	750	2	6.9901
C6orf222	2	0.99466	0.999463	21269	0	0.010255	0.970617	266	2	6.9901
C7orf25	1	0.92737	0.996322	19874	0	0.072928	0.994322	2646	1	6.9901
DCAF17	3	0.95738	0.997574	20489	0	0.039718	0.972765	751	2	6.9901
hsa-mir-5687	3	0.9987	0.999829	21347	0	0.0037152	0.956958	64	3	6.9901
KLF14	3	0.85313	0.996322	18234	0	0.039718	0.972765	749	2	6.9901
TMEM214	3	0.83802	0.996322	17922	0	0.039718	0.972765	752	2	6.9901
ADAP1	3	0.97035	0.998121	20777	0	0.040371	0.972765	764	3	6.9864
FAM122B	3	0.78724	0.996322	16823	1	0.040371	0.972765	765	2	6.9864
SEC14L6	3	0.59584	0.996322	12066	1	0.040371	0.972765	763	2	6.9864
SMYD5	3	0.82035	0.996322	17546	0	0.040371	0.972765	761	2	6.9864
SNX11	3	0.94317	0.996909	20220	0	0.040371	0.972765	762	2	6.9864
IFNL2	2	0.99241	0.999457	21219	0	0.014492	0.972765	386	2	6.985
ERMAP	3	0.68185	0.996322	14289	1	0.041013	0.972765	772	2	6.9826
FAM25C	3	0.91304	0.996322	19549	0	0.010472	0.970617	181	2	6.9826
BTN3A1	3	0.98726	0.99926	21113	0	0.03403	0.972765	628	3	6.9789
RBP1	3	0.99816	0.999749	21338	0	0.0052412	0.970617	96	3	6.9789
TEAD2	1	0.92546	0.996322	19831	0	0.074908	0.994322	2707	1	6.9789
UCK1	3	0.58848	0.996322	11870	1	0.041757	0.972765	783	2	6.9789
RTN4	2	0.99192	0.999404	21212	0	0.015407	0.972765	401	2	6.9755
RBM20	3	0.79352	0.996322	16970	1	0.042526	0.972765	796	2	6.9751
RFX7	1	0.92472	0.996322	19819	0	0.075654	0.994322	2728	1	6.9751
CCDC107	1	0.92403	0.996322	19806	0	0.076365	0.994322	2744	1	6.9713
RELN	3	0.9817	0.998829	21005	0	0.043243	0.972765	807	3	6.9713
C1QTNF9	3	0.74521	0.996322	15835	1	0.043848	0.972765	823	2	6.9675
CTAG2	3	0.90449	0.996322	19338	0	0.043848	0.972765	822	2	6.9675
DISC1	1	0.92343	0.996322	19790	0	0.076992	0.994322	2769	1	6.9675
DKK4	2	0.98653	0.999165	21097	0	0.025462	0.972765	662	2	6.9675
GIPC3	1	0.92343	0.996322	19789	0	0.076992	0.994322	2770	1	6.9675
SEC22C	3	0.79102	0.996322	16915	1	0.043848	0.972765	824	2	6.9675
TMEM211	3	0.81354	0.996322	17393	0	0.042634	0.972765	799	2	6.9675
B3GALT5	3	0.91897	0.996322	19693	0	0.044579	0.972765	842	2	6.9637
GTF2F2	3	0.78239	0.996322	16705	1	0.044579	0.972765	839	2	6.9637
hsa-mir-5692c-2	3	0.94668	0.997216	20286	0	0.044579	0.972765	840	2	6.9637
SDHAF1	3	0.28627	0.995105	5812	1	0.044579	0.972765	841	2	6.9637
TSPY3	1	0.92273	0.996322	19776	0	0.077694	0.994322	2791	1	6.9637
HIST1H2BO	2	0.97721	0.998185	20923	0	0.04236	0.972765	1063	2	6.9628
ACAP2	3	0.3207	0.996322	6436	1	0.045379	0.972765	858	2	6.9599
CDKL1	3	0.93036	0.996322	19948	0	0.045379	0.972765	857	2	6.9599
FOXD4L5	3	0.61686	0.996322	12666	1	0.045379	0.972765	856	2	6.9599
hsa-mir-548v	3	0.36375	0.996322	7234	1	0.045379	0.972765	855	2	6.9599
MCTS1	1	0.922	0.996322	19752	0	0.078437	0.994322	2823	1	6.9599
RNF4	1	0.922	0.996322	19753	0	0.078437	0.994322	2821	1	6.9599
TMPRSS6	1	0.922	0.996322	19754	0	0.078437	0.994322	2822	1	6.9599
ICK	2	0.98922	0.99926	21158	0	0.020407	0.972765	523	2	6.9562
GEMIN6	3	0.84021	0.996322	17964	0	0.046237	0.978399	870	2	6.956
KLHL9	3	0.26741	0.994862	5374	1	0.046237	0.978399	871	2	6.956
RAB11A	3	0.80737	0.996322	17276	1	0.046237	0.978399	867	2	6.956
STK38	3	0.93855	0.996692	20123	0	0.046237	0.978399	869	2	6.956
TGM7	3	0.95501	0.997574	20445	0	0.046237	0.978399	868	2	6.956
WDR81	3	0.99567	0.999463	21284	0	0.012207	0.970617	220	3	6.956
ZNF300	2	0.98945	0.99926	21160	0	0.019961	0.972765	514	2	6.9528
APIP	3	0.9791	0.998361	20954	0	0.047115	0.981813	882	3	6.9522
BIRC7	3	0.85272	0.996322	18230	0	0.047115	0.981813	881	2	6.9522
GPC4	3	0.99367	0.999457	21242	0	0.01759	0.972765	322	3	6.9522
PRDX6	3	0.98172	0.998829	21006	0	0.047115	0.981813	880	3	6.9522
SKIV2L2	1	0.92042	0.996322	19720	0	0.080068	0.994322	2865	1	6.9522
DDO	3	0.99942	0.999829	21360	0	0.0016736	0.956958	28	3	6.9483
AP5B1	3	0.79653	0.996322	17037	1	0.048871	0.98809	906	2	6.9445
ARSD	3	0.99927	0.999829	21357	0	0.0020877	0.956958	38	3	6.9445
CSAD	1	0.91884	0.996322	19674	0	0.081628	0.994322	2923	1	6.9445
NPY1R	3	0.83448	0.996322	17842	0	0.048871	0.98809	905	2	6.9445
NUDCD1	1	0.91884	0.996322	19673	0	0.081628	0.994322	2922	1	6.9445
PODXL2	3	0.44198	0.996322	8636	1	0.048871	0.98809	907	2	6.9445
ZNF92	2	0.99175	0.999377	21210	0	0.015688	0.972765	410	2	6.9421
ARPP21	3	0.86903	0.996322	18563	0	0.049773	0.988529	920	2	6.9406
DNAH2	1	0.91801	0.996322	19658	0	0.082428	0.994322	2943	1	6.9406
hsa-mir-3137	3	0.99944	0.999829	21361	0	0.0016138	0.956958	26	3	6.9406
hsa-mir-4257	1	0.91801	0.996322	19657	0	0.082428	0.994322	2944	1	6.9406
hsa-mir-4496	3	0.21901	0.987402	4289	1	0.049773	0.988529	919	2	6.9406
OR1K1	3	0.52134	0.996322	10093	1	0.049773	0.988529	918	2	6.9406
TXNDC5	1	0.91801	0.996322	19659	0	0.082428	0.994322	2945	1	6.9406
ZNF780B	3	0.69357	0.996322	14573	1	0.049773	0.988529	921	2	6.9406
hsa-mir-4263	4	0.93211	0.996322	19988	0	0.0081047	0.970617	113	3	6.9367
hsa-mir-4534	3	0.78824	0.996322	16844	1	0.050748	0.988529	933	2	6.9367
IDH3B	3	0.89063	0.996322	19061	0	0.050748	0.988529	932	2	6.9367
KRTAP9-6	1	0.91708	0.996322	19632	0	0.08332	0.994322	2973	1	6.9367
MCF2L	3	0.96074	0.997574	20550	0	0.050748	0.988529	934	2	6.9367
AMOT	3	0.64462	0.996322	13375	1	0.051828	0.988529	954	2	6.9328
CNN3	3	0.98983	0.99926	21166	0	0.027543	0.972765	503	3	6.9328
CSHL1	3	0.67719	0.996322	14144	1	0.051828	0.988529	953	2	6.9328
LAMA2	3	0.99735	0.999632	21316	0	0.0074241	0.970617	133	3	6.9328
LINS	3	0.86778	0.996322	18535	0	0.051828	0.988529	951	2	6.9328
MRGPRX4	3	0.94799	0.997574	20306	0	0.051828	0.988529	950	2	6.9328
SNPH	3	0.94485	0.997045	20251	0	0.051828	0.988529	952	2	6.9328
TBX22	3	0.52938	0.996322	10271	1	0.051828	0.988529	948	2	6.9328
TSKS	3	0.34798	0.996322	6960	1	0.051828	0.988529	949	2	6.9328
USP9X	3	0.66805	0.996322	13941	1	0.051828	0.988529	947	2	6.9328
ZRANB2	1	0.91612	0.996322	19608	0	0.084258	0.994322	3011	1	6.9328
C17orf80	1	0.91508	0.996322	19589	0	0.085294	0.994322	3041	1	6.9289
KMT2B	3	0.9676	0.997574	20723	0	0.05304	0.990448	976	2	6.9289
NUBP1	3	0.91849	0.996322	19677	0	0.05304	0.990448	975	2	6.9289
RPS26	1	0.91508	0.996322	19588	0	0.085294	0.994322	3042	1	6.9289
SMARCA5	3	0.98611	0.999165	21083	0	0.026903	0.972765	495	3	6.9289
USP51	3	0.98722	0.99926	21112	0	0.034114	0.972765	629	3	6.9289
hsa-mir-766	2	0.99028	0.99926	21176	0	0.018441	0.972765	483	2	6.9279
ARHGAP11A	2	0.99028	0.99926	21174	0	0.018441	0.972765	482	2	6.926
CCDC147	3	0.62261	0.996322	12822	1	0.054137	0.990448	1001	2	6.925
DHX35	3	0.959	0.997574	20523	0	0.054137	0.990448	1000	2	6.925
EGLN2	1	0.91411	0.996322	19564	0	0.086264	0.994322	3084	1	6.925
HSPA12A	1	0.91411	0.996322	19566	0	0.086264	0.994322	3080	1	6.925
IFIT5	3	0.98682	0.999165	21107	0	0.035113	0.972765	644	3	6.925
LOC100287534	1	0.91411	0.996322	19565	0	0.086264	0.994322	3079	1	6.925
RDH5	1	0.91411	0.996322	19569	0	0.086264	0.994322	3081	1	6.925
USP49	1	0.91411	0.996322	19567	0	0.086264	0.994322	3083	1	6.925
CCNB1IP1	3	0.98568	0.999165	21076	0	0.037898	0.972765	707	3	6.9211
DCUN1D3	3	0.89847	0.996322	19210	0	0.055186	0.993632	1015	2	6.9211
DPYD	1	0.91319	0.996322	19542	0	0.087162	0.994322	3110	1	6.9211
FAN1	3	0.96397	0.997574	20634	0	0.055186	0.993632	1016	2	6.9211
RIMBP3C	1	0.91319	0.996322	19543	0	0.087162	0.994322	3111	1	6.9211
ZFC3H1	3	0.98878	0.99926	21139	0	0.030211	0.972765	555	3	6.9211
ABCC6	1	0.91228	0.996322	19520	0	0.088033	0.994322	3146	1	6.9172
hsa-mir-627	3	0.99679	0.999632	21309	0	0.009015	0.970617	157	3	6.9172
MRPL21	3	0.91253	0.996322	19532	0	0.056183	0.994322	1034	2	6.9172
THNSL1	1	0.91228	0.996322	19518	0	0.088033	0.994322	3145	1	6.9172
TMEM241	3	0.76114	0.996322	16217	1	0.056183	0.994322	1036	2	6.9172
TRNAU1AP	3	0.71161	0.996322	15022	1	0.056183	0.994322	1035	2	6.9172
MBD3L2	3	0.1899	0.984333	3633	1	0.057257	0.994322	1047	2	6.9132
PRKRIP1	1	0.9113	0.996322	19494	0	0.089015	0.994322	3176	1	6.9132
RNF113A	1	0.9113	0.996322	19497	0	0.089015	0.994322	3175	1	6.9132
STT3B	1	0.9113	0.996322	19491	0	0.089015	0.994322	3173	1	6.9132
WDFY2	3	0.88483	0.996322	18919	0	0.057257	0.994322	1046	2	6.9132
ZNF710	3	0.90715	0.996322	19409	0	0.057257	0.994322	1045	2	6.9132
CDRT15	3	0.69005	0.996322	14483	1	0.0584	0.994322	1061	2	6.9093
CNOT4	3	0.10329	0.976462	1899	1	0.0584	0.994322	1058	2	6.9093
ERAP2	3	0.99783	0.999632	21332	0	0.0061339	0.970617	109	3	6.9093
LDHAL6A	3	0.71431	0.996322	15104	1	0.0584	0.994322	1059	2	6.9093
NDUFB8	3	0.66357	0.996322	13830	1	0.0584	0.994322	1060	2	6.9093
SCPEP1	1	0.91034	0.996322	19468	0	0.089969	0.994322	3204	1	6.9093
SLC7A8	3	0.19251	0.984333	3683	1	0.055907	0.994322	1027	2	6.9093
SOWAHB	3	0.98369	0.998901	21044	0	0.042859	0.972765	802	3	6.9093
UNC45A	1	0.91034	0.996322	19469	0	0.089969	0.994322	3205	1	6.9093
USP6	1	0.91034	0.996322	19470	0	0.089969	0.994322	3206	1	6.9093
SLC2A9	2	0.9908	0.99926	21185	0	0.017423	0.972765	463	2	6.9091
hsa-mir-513c	4	0.9999	0.999904	21371	0	0.00039401	0.892574	6	4	6.9072
CKM	3	0.99282	0.999457	21226	0	0.019753	0.972765	368	3	6.9053
KATNAL1	3	0.99039	0.99926	21178	0	0.026049	0.972765	478	3	6.9053
KRTAP9-7	3	0.63935	0.996322	13243	1	0.05944	0.994322	1079	2	6.9053
POLA2	1	0.90947	0.996322	19446	0	0.090872	0.994322	3233	1	6.9053
TRIL	3	0.87688	0.996322	18729	0	0.05944	0.994322	1080	2	6.9053
USP22	3	0.64972	0.996322	13506	1	0.049898	0.988529	924	2	6.9053
HTN1	1	0.90849	0.996322	19430	0	0.091859	0.994322	3273	1	6.9013
KIAA0196	3	0.9789	0.998361	20950	0	0.054451	0.990448	1005	3	6.9013
LCP2	3	0.45701	0.996322	8886	1	0.060613	0.994322	1105	2	6.9013
NLGN1	1	0.90849	0.996322	19427	0	0.091859	0.994322	3272	1	6.9013
OLFM1	3	0.69807	0.996322	14676	1	0.060613	0.994322	1104	2	6.9013
VPS13C	3	0.94624	0.997216	20277	0	0.060613	0.994322	1103	2	6.9013
ZNF331	2	0.99117	0.99926	21196	0	0.016755	0.972765	441	2	6.9013
DTNB	2	0.97555	0.998121	20879	0	0.045284	0.972765	1144	2	6.9005
hsa-mir-6810	4	0.62397	0.996322	11543	1	0.014579	0.972765	200	3	6.9005
C6orf25	1	0.90751	0.996322	19408	0	0.09285	0.994322	3298	1	6.8973
FAM129A	3	0.47345	0.996322	9192	1	0.061807	0.994322	1125	2	6.8973
IFNAR2	3	0.70952	0.996322	14965	1	0.061807	0.994322	1124	2	6.8973
MZT1	3	0.42216	0.996322	8285	1	0.030508	0.972765	564	2	6.8973
PLK5	1	0.90751	0.996322	19407	0	0.09285	0.994322	3299	1	6.8973
TSPAN14	3	0.90576	0.996322	19366	0	0.061807	0.994322	1126	2	6.8973
AIMP2	3	0.56234	0.996322	11090	1	0.063089	0.994322	1148	2	6.8933
ERRFI1	1	0.90644	0.996322	19378	0	0.093911	0.994322	3336	1	6.8933
FCHSD1	1	0.90644	0.996322	19375	0	0.093911	0.994322	3337	1	6.8933
KLF9	1	0.90644	0.996322	19379	0	0.093911	0.994322	3339	1	6.8933
KRTAP10-6	1	0.90644	0.996322	19380	0	0.093911	0.994322	3340	1	6.8933
PKDCC	3	0.65398	0.996322	13602	1	0.063089	0.994322	1149	2	6.8933
RNH1	1	0.90644	0.996322	19376	0	0.093911	0.994322	3338	1	6.8933
SUPT4H1	3	0.99114	0.99926	21193	0	0.024045	0.972765	448	3	6.8933
ARL14	2	0.98871	0.99926	21141	0	0.021361	0.972765	548	2	6.8906
VAV3	2	0.98367	0.998901	21042	0	0.030601	0.972765	804	2	6.8901
C7orf72	3	0.99909	0.999829	21352	0	0.0025839	0.956958	48	3	6.8893
CELF5	3	0.41351	0.996322	8106	1	0.06436	0.994322	1165	2	6.8893
DDX10	3	0.60655	0.996322	12372	1	0.06436	0.994322	1169	2	6.8893
EFCAB4A	1	0.90542	0.996322	19344	0	0.094968	0.994322	3375	1	6.8893
MICA	3	0.93974	0.996692	20143	0	0.06436	0.994322	1166	2	6.8893
PCYT1B	3	0.56469	0.996322	11165	1	0.06436	0.994322	1168	2	6.8893
RPL7	1	0.90542	0.996322	19347	0	0.094968	0.994322	3378	1	6.8893
SCRT1	3	0.81471	0.996322	17419	0	0.06436	0.994322	1167	2	6.8893
UBAP2	2	0.98786	0.99926	21123	0	0.022962	0.972765	600	2	6.8861
CLCNKA	1	0.90447	0.996322	19333	0	0.095905	0.994322	3414	1	6.8853
CREB3L3	3	0.99213	0.999457	21213	0	0.021521	0.972765	396	3	6.8853
MED31	3	0.99072	0.99926	21182	0	0.02519	0.972765	469	3	6.8853
NETO2	3	0.64686	0.996322	13432	1	0.062463	0.994322	1141	2	6.8853
C11orf82	3	0.62766	0.996322	12943	1	0.066541	0.994322	1204	2	6.8813
CENPE	3	0.53599	0.996322	10395	1	0.066541	0.994322	1205	2	6.8813
hsa-mir-377	3	0.79955	0.996322	17113	1	0.066541	0.994322	1206	2	6.8813
PFDN5	3	0.9276	0.996322	19888	0	0.041448	0.972765	778	2	6.8813
PSMB3	1	0.90364	0.996322	19316	0	0.096764	0.994322	3438	1	6.8813
ZDHHC7	3	0.9974	0.999632	21318	0	0.0072648	0.970617	130	3	6.8813
B4GALT1	3	0.64252	0.996322	13327	1	0.067607	0.994322	1227	2	6.8772
CPA1	3	0.61054	0.996322	12498	1	0.067607	0.994322	1226	2	6.8772
DSCR6	3	0.68932	0.996322	14463	1	0.067607	0.994322	1225	2	6.8772
hsa-mir-320c-2	3	0.70859	0.996322	14938	1	0.067607	0.994322	1224	2	6.8772
CBX4	3	0.77563	0.996322	16548	1	0.068906	0.994322	1247	2	6.8732
EFHC1	3	0.79895	0.996322	17099	1	0.068906	0.994322	1253	2	6.8732
FAM227A	3	0.99237	0.999457	21217	0	0.020908	0.972765	388	3	6.8732
FRAT1	3	0.97843	0.998361	20943	0	0.055533	0.994322	1019	3	6.8732
LILRA2	3	0.96479	0.997574	20654	0	0.068906	0.994322	1252	2	6.8732
LTB4R2	3	0.56234	0.996322	11083	1	0.068906	0.994322	1250	2	6.8732
PCDHB10	3	0.66563	0.996322	13883	1	0.068906	0.994322	1251	2	6.8732
PPAP2A	3	0.85625	0.996322	18306	0	0.068906	0.994322	1254	2	6.8732
SETD4	3	0.98514	0.999165	21065	0	0.039306	0.972765	742	3	6.8732
SGK223	1	0.90176	0.996322	19283	0	0.098668	0.994322	3487	1	6.8732
SIX3	3	0.59584	0.996322	12073	1	0.068906	0.994322	1248	2	6.8732
SSH3	3	0.99888	0.999829	21349	0	0.0031894	0.956958	58	3	6.8732
TMEM174	3	0.84912	0.996322	18146	0	0.068906	0.994322	1249	2	6.8732
NELFB	2	0.98675	0.999165	21105	0	0.025026	0.972765	646	2	6.8698
BEND3	3	0.96544	0.997574	20676	0	0.070246	0.994322	1270	2	6.8691
HECTD1	1	0.90066	0.996322	19257	0	0.099786	0.994322	3523	1	6.8691
PAK6	3	0.95686	0.997574	20479	0	0.066831	0.994322	1209	2	6.8691
PCYOX1L	1	0.90066	0.996322	19256	0	0.099786	0.994322	3522	1	6.8691
ZNF654	3	0.65723	0.996322	13674	1	0.070246	0.994322	1269	2	6.8691
CSN3	3	0.69431	0.996322	14584	1	0.018636	0.972765	343	2	6.865
PCDHB8	3	0.99678	0.999632	21308	0	0.0090822	0.970617	159	3	6.865
PPP1R3E	3	0.91004	0.996322	19472	0	0.071437	0.994322	1288	2	6.865
WDR46	3	0.96765	0.997574	20725	0	0.071437	0.994322	1287	2	6.865
DEFB105B	1	0.89867	0.996322	19203	0	0.10174	0.994322	3562	1	6.861
FKBP9	3	0.8873	0.996322	18978	0	0.072741	0.994322	1312	2	6.861
ME3	3	0.79922	0.996322	17106	1	0.072741	0.994322	1310	2	6.861
RPL34	3	0.51728	0.996322	10027	1	0.072741	0.994322	1311	2	6.861
ZNF296	1	0.89867	0.996322	19204	0	0.10174	0.994322	3563	1	6.861
ELOVL1	2	0.98828	0.99926	21132	0	0.022147	0.972765	578	2	6.8607
BBS9	1	0.89756	0.996322	19193	0	0.10281	0.994322	3601	1	6.8568
C2CD2	3	0.73479	0.996322	15586	1	0.074141	0.994322	1328	2	6.8568
CD4	3	0.98665	0.999165	21100	0	0.035565	0.972765	659	3	6.8568
CTR9	3	0.86914	0.996322	18565	0	0.074141	0.994322	1329	2	6.8568
ZDHHC11	3	0.72169	0.996322	15284	1	0.074141	0.994322	1327	2	6.8568
COA6	2	0.98249	0.998901	21018	0	0.032663	0.972765	862	2	6.8565
CADM2	3	0.99609	0.999471	21298	0	0.011018	0.970617	193	3	6.8527
CCDC114	3	0.59044	0.996322	11893	1	0.075554	0.994322	1354	2	6.8527
CNTN6	1	0.89643	0.996322	19161	0	0.10389	0.994322	3631	1	6.8527
MDM1	2	0.98895	0.99926	21151	0	0.020904	0.972765	533	2	6.8527
MLH3	3	0.97979	0.998361	20973	0	0.05224	0.988529	960	3	6.8527
OR51E1	3	0.75975	0.996322	16188	1	0.030252	0.972765	556	2	6.8527
TMEM178A	3	0.65249	0.996322	13569	1	0.075554	0.994322	1353	2	6.8527
hsa-mir-3609	4	0.93872	0.996692	20129	0	0.01901	0.972765	269	3	6.8501
CCDC8	3	0.97692	0.998121	20917	0	0.059186	0.994322	1073	3	6.8486
CDCA8	3	0.9399	0.996692	20150	0	0.023852	0.972765	444	2	6.8486
ENKUR	3	0.85335	0.996322	18240	0	0.07721	0.994322	1378	2	6.8486
hsa-mir-6778	3	0.87931	0.996322	18783	0	0.07721	0.994322	1377	2	6.8486
KNSTRN	3	0.94428	0.997045	20240	0	0.0088023	0.970617	153	2	6.8486
NDUFB4	3	0.9414	0.996752	20182	0	0.07721	0.994322	1382	2	6.8486
OR4D9	3	0.91953	0.996322	19708	0	0.07721	0.994322	1379	2	6.8486
SNAPC1	3	0.39276	0.996322	7736	1	0.07721	0.994322	1381	2	6.8486
TAL1	3	0.99181	0.999383	21207	0	0.022365	0.972765	413	3	6.8486
TNFAIP8L3	3	0.958	0.997574	20502	0	0.07721	0.994322	1380	2	6.8486
CPNE8	2	0.98745	0.99926	21118	0	0.023733	0.972765	617	2	6.8483
CIRBP	2	0.98724	0.99926	21114	0	0.024137	0.972765	626	2	6.8482
C20orf166	1	0.89397	0.996322	19116	0	0.10629	0.994322	3682	1	6.8445
ELTD1	3	0.94538	0.997203	20260	0	0.078592	0.994322	1403	2	6.8445
HUS1B	3	0.77366	0.996322	16498	1	0.036171	0.972765	670	2	6.8445
ITGAD	3	0.64686	0.996322	13437	1	0.017652	0.972765	324	2	6.8445
SAFB	3	0.97842	0.998361	20942	0	0.055568	0.994322	1020	3	6.8445
TPCN2	1	0.89397	0.996322	19117	0	0.10629	0.994322	3681	1	6.8445
APBB2	2	0.98135	0.998797	20996	0	0.034766	0.972765	900	2	6.8423
ANKRD61	2	0.97952	0.998361	20965	0	0.03807	0.972765	974	2	6.8415
PGBD4	2	0.98367	0.998901	21043	0	0.030601	0.972765	803	2	6.8413
EDEM1	3	0.65398	0.996322	13599	1	0.079347	0.994322	1419	2	6.8403
hsa-mir-3652	3	0.91841	0.996322	19675	0	0.079347	0.994322	1417	2	6.8403
KBTBD6	3	0.19194	0.984333	3671	1	0.079347	0.994322	1416	2	6.8403
NLRP2	3	0.21655	0.987402	4218	1	0.079347	0.994322	1421	2	6.8403
RGAG1	3	0.87868	0.996322	18766	0	0.079347	0.994322	1420	2	6.8403
SLC22A2	3	0.65797	0.996322	13695	1	0.079347	0.994322	1422	2	6.8403
VAX1	3	0.88608	0.996322	18946	0	0.079347	0.994322	1418	2	6.8403
EIF4G2	2	0.98806	0.99926	21128	0	0.022595	0.972765	593	2	6.8382
NPY	2	0.98653	0.999165	21098	0	0.025462	0.972765	663	2	6.8378
ACKR4	3	0.96193	0.997574	20580	0	0.080215	0.994322	1440	2	6.8362
DSC3	3	0.70726	0.996322	14895	1	0.065391	0.994322	1185	2	6.8362
FAM186B	3	0.91821	0.996322	19666	0	0.0015392	0.956958	24	2	6.8362
hsa-mir-1183	3	0.61297	0.996322	12568	1	0.080215	0.994322	1445	2	6.8362
IFIH1	3	0.98187	0.998847	21008	0	0.047227	0.981813	884	3	6.8362
MNF1	3	0.29908	0.996322	6074	1	0.080215	0.994322	1439	2	6.8362
MRPL20	1	0.89202	0.996322	19079	0	0.10827	0.994322	3731	1	6.8362
PABPC1L2A	3	0.89781	0.996322	19197	0	0.080215	0.994322	1442	2	6.8362
RASSF7	3	0.79612	0.996322	17025	1	0.080215	0.994322	1438	2	6.8362
REG3A	3	0.44312	0.996322	8652	1	0.080215	0.994322	1443	2	6.8362
RPL7L1	3	0.5923	0.996322	11971	1	0.080215	0.994322	1441	2	6.8362
ZFP36	3	0.96595	0.997574	20689	0	0.080215	0.994322	1444	2	6.8362
hsa-mir-1283-2	4	0.99218	0.999457	21214	0	0.018074	0.972765	260	4	6.8361
RPS3A	2	0.98523	0.999165	21068	0	0.027871	0.972765	734	2	6.833
CYP26C1	3	0.70807	0.996322	14919	1	0.081164	0.994322	1461	2	6.832
hsa-mir-5100	3	0.89228	0.996322	19088	0	0.081164	0.994322	1463	2	6.832
OVOL2	3	0.8758	0.996322	18698	0	0.081164	0.994322	1464	2	6.832
PLEKHA3	3	0.67719	0.996322	14154	1	0.033579	0.972765	622	2	6.832
TMEM68	3	0.65159	0.996322	13555	1	0.081164	0.994322	1462	2	6.832
TMEM92	1	0.89086	0.996322	19060	0	0.10945	0.994322	3760	1	6.832
CIRH1A	2	0.98634	0.999165	21088	0	0.025869	0.972765	674	2	6.8316
BTC	3	0.98636	0.999165	21092	0	0.036288	0.972765	673	3	6.8278
DUS1L	3	0.99729	0.999632	21315	0	0.0075886	0.970617	137	3	6.8278
INTS4	3	0.86141	0.996322	18401	0	0.081956	0.994322	1475	2	6.8278
RAP1GAP2	3	0.91104	0.996322	19498	0	0.081956	0.994322	1474	2	6.8278
SELRC1	3	0.9923	0.999457	21215	0	0.02113	0.972765	392	3	6.8278
TMEM43	3	0.86954	0.996322	18576	0	0.081956	0.994322	1476	2	6.8278
TRIM8	1	0.88992	0.996322	19035	0	0.11037	0.994322	3782	1	6.8278
USP17L1P	1	0.88992	0.996322	19033	0	0.11037	0.994322	3780	1	6.8278
ZER1	3	0.87264	0.996322	18633	0	0.081956	0.994322	1477	2	6.8278
NKAP	2	0.98764	0.99926	21119	0	0.023346	0.972765	610	2	6.8257
FAM220A	3	0.93176	0.996322	19982	0	0.082773	0.994322	1493	2	6.8236
GOLGA8A	1	0.88902	0.996322	19013	0	0.11133	0.994322	3801	1	6.8236
IKBKG	3	0.98183	0.998847	21007	0	0.04732	0.981813	886	3	6.8236
IL17C	3	0.58213	0.996322	11689	1	0.082773	0.994322	1494	2	6.8236
SETD1A	3	0.82213	0.996322	17577	0	0.082773	0.994322	1492	2	6.8236
SS18L1	3	0.58648	0.996322	11831	1	0.082773	0.994322	1495	2	6.8236
TNNC1	2	0.98609	0.999165	21082	0	0.026287	0.972765	692	2	6.8233
ASB4	3	0.97665	0.998121	20910	0	0.059801	0.994322	1086	3	6.8194
CACNB1	3	0.97731	0.998191	20926	0	0.05822	0.994322	1055	3	6.8194
COX4I2	3	0.92279	0.996322	19784	0	0.083571	0.994322	1504	2	6.8194
CRTC2	1	0.88804	0.996322	18987	0	0.11229	0.994322	3822	1	6.8194
CYB5B	1	0.88804	0.996322	18989	0	0.11229	0.994322	3821	1	6.8194
GAS2	3	0.72171	0.996322	15285	1	0.083571	0.994322	1505	2	6.8194
KRTAP10-8	3	0.55568	0.996322	10913	1	0.083571	0.994322	1506	2	6.8194
PSMD2	3	0.62897	0.996322	12982	1	0.050555	0.988529	928	2	6.8194
hsa-mir-4449	4	0.97844	0.998361	20944	0	0.032827	0.972765	485	3	6.8175
CPLX3	2	0.98343	0.998901	21037	0	0.030976	0.972765	814	2	6.8154
DNAH12	3	0.96975	0.998121	20761	0	0.075888	0.994322	1361	3	6.8152
FBXO3	3	0.81555	0.996322	17437	0	0.084424	0.994322	1523	2	6.8152
GTSE1	3	0.49012	0.996322	9494	1	0.012155	0.970617	218	2	6.8152
HCAR2	3	0.95302	0.997574	20408	0	0.084424	0.994322	1522	2	6.8152
hsa-mir-517c	1	0.88707	0.996322	18965	0	0.11329	0.994322	3847	1	6.8152
KRTAP19-8	3	0.97845	0.998361	20945	0	0.055496	0.994322	1018	3	6.8152
NETO1	3	0.48421	0.996322	9384	1	0.084424	0.994322	1524	2	6.8152
OR6K6	3	0.98982	0.99926	21165	0	0.027558	0.972765	504	3	6.8152
RPL29	3	0.20364	0.987402	3928	1	0.048757	0.98809	903	2	6.8152
SGCB	3	0.91901	0.996322	19695	0	0.084424	0.994322	1521	2	6.8152
SLC9B2	3	0.99582	0.999463	21291	0	0.011795	0.970617	208	3	6.8152
TBC1D3F	1	0.88707	0.996322	18963	0	0.11329	0.994322	3849	1	6.8152
MYO16	2	0.98387	0.998964	21048	0	0.030251	0.972765	794	2	6.8138
TGFBRAP1	2	0.98406	0.998991	21051	0	0.029947	0.972765	786	2	6.8119
CPNE9	3	0.68594	0.996322	14393	1	0.085369	0.994322	1544	2	6.8109
hsa-mir-542	3	0.76753	0.996322	16354	1	0.085369	0.994322	1545	2	6.8109
TMEM185B	3	0.55359	0.996322	10870	1	0.085369	0.994322	1546	2	6.8109
USP12	3	0.95471	0.997574	20439	0	0.085369	0.994322	1543	2	6.8109
PIGO	2	0.98675	0.999165	21103	0	0.025026	0.972765	645	2	6.8088
CHN1	3	0.088335	0.976462	1632	1	0.08632	0.994322	1561	2	6.8067
GRM7	3	0.63536	0.996322	13142	1	0.08632	0.994322	1559	2	6.8067
KLHL18	3	0.55781	0.996322	10967	1	0.08632	0.994322	1560	2	6.8067
METTL3	3	0.69519	0.996322	14608	1	0.08632	0.994322	1562	2	6.8067
PTF1A	3	0.99093	0.99926	21188	0	0.024632	0.972765	458	3	6.8067
SLAMF8	3	0.72961	0.996322	15477	1	0.024598	0.972765	456	2	6.8067
HSD17B6	2	0.98285	0.998901	21023	0	0.032009	0.972765	845	2	6.8026
GNG10	3	0.1252	0.976462	2335	1	0.087193	0.994322	1580	2	6.8024
MYL5	3	0.61183	0.996322	12538	1	0.087193	0.994322	1583	2	6.8024
PKIG	3	0.22934	0.989072	4553	1	0.087193	0.994322	1582	2	6.8024
PREX2	1	0.8839	0.996322	18887	0	0.1164	0.994322	3914	1	6.8024
SOAT2	3	0.95132	0.997574	20367	0	0.087193	0.994322	1581	2	6.8024
THAP2	3	0.9984	0.999829	21341	0	0.0045681	0.956958	84	3	6.8024
TLE6	3	0.55157	0.996322	10802	1	0.087193	0.994322	1584	2	6.8024
CPSF3L	1	0.88297	0.996322	18863	0	0.11732	0.994322	3938	1	6.7982
hsa-mir-3615	3	0.91476	0.996322	19594	0	0.088031	0.994322	1600	2	6.7982
LEMD1	2	0.98634	0.999165	21091	0	0.025869	0.972765	676	2	6.7982
NAT16	3	0.72555	0.996322	15382	1	0.088031	0.994322	1599	2	6.7982
NR1I2	1	0.88297	0.996322	18865	0	0.11732	0.994322	3937	1	6.7982
NUDT12	3	0.97965	0.998361	20969	0	0.052586	0.990448	967	3	6.7982
SLFN11	3	0.99795	0.999632	21335	0	0.0058031	0.970617	105	3	6.7982
TBC1D10A	3	0.95397	0.997574	20431	0	0.088031	0.994322	1601	2	6.7982
ALS2	3	0.59908	0.996322	12159	1	0.088945	0.994322	1621	2	6.7939
C4orf6	3	0.28281	0.994862	5736	1	0.088945	0.994322	1620	2	6.7939
DPAGT1	3	0.93443	0.996342	20042	0	0.088945	0.994322	1618	2	6.7939
ILDR1	3	0.28281	0.994862	5734	1	0.088945	0.994322	1619	2	6.7939
LANCL3	3	0.96124	0.997574	20563	0	0.088945	0.994322	1622	2	6.7939
MBD3L5	1	0.88196	0.996322	18842	0	0.11832	0.994322	3959	1	6.7939
PTGDS	1	0.88196	0.996322	18839	0	0.11832	0.994322	3957	1	6.7939
SNRPG	1	0.88196	0.996322	18840	0	0.11832	0.994322	3956	1	6.7939
AATF	3	0.74642	0.996322	15873	1	0.089727	0.994322	1643	2	6.7896
C17orf64	3	0.94819	0.997574	20310	0	0.089727	0.994322	1642	2	6.7896
FGF9	3	0.79086	0.996322	16910	1	0.089727	0.994322	1640	2	6.7896
GH2	3	0.9592	0.997574	20527	0	0.089727	0.994322	1641	2	6.7896
HOXB5	1	0.88109	0.996322	18817	0	0.11917	0.994322	3974	1	6.7896
NAA60	3	0.43845	0.996322	8562	1	0.089727	0.994322	1644	2	6.7896
ZNF248	3	0.96829	0.997574	20745	0	0.089727	0.994322	1645	2	6.7896
CENPV	3	0.19251	0.984333	3685	1	0.090627	0.994322	1663	2	6.7853
CYTH1	3	0.42344	0.996322	8302	1	0.090627	0.994322	1664	2	6.7853
FAM114A2	3	0.86289	0.996322	18431	0	0.090627	0.994322	1665	2	6.7853
FAM13B	3	0.69571	0.996322	14619	1	0.090627	0.994322	1666	2	6.7853
FKBP7	3	0.97825	0.998361	20938	0	0.05598	0.994322	1029	3	6.7853
PDCD4	3	0.97176	0.998121	20802	0	0.071219	0.994322	1285	3	6.7853
TMEM164	3	0.64972	0.996322	13505	1	0.090627	0.994322	1667	2	6.7853
hsa-mir-8062	4	0.98724	0.99926	21117	0	0.037672	0.972765	586	3	6.7831
ARHGAP17	3	0.95191	0.997574	20380	0	0.091571	0.994322	1684	2	6.781
C10orf107	3	0.070092	0.976462	1303	1	0.091571	0.994322	1686	2	6.781
CEACAM4	1	0.87913	0.996322	18771	0	0.12108	0.994322	4025	1	6.781
hsa-mir-6788	3	0.78466	0.996322	16761	1	0.091571	0.994322	1680	2	6.781
MS4A4A	3	0.063253	0.976462	1152	1	0.091571	0.994322	1682	2	6.781
OPHN1	3	0.80066	0.996322	17133	1	0.091571	0.994322	1685	2	6.781
OR10G3	3	0.97001	0.998121	20766	0	0.075247	0.994322	1349	3	6.781
PLD5	3	0.90038	0.996322	19261	0	0.091571	0.994322	1683	2	6.781
WDR3	3	0.86995	0.996322	18579	0	0.091571	0.994322	1681	2	6.781
IQGAP2	2	0.98172	0.998829	21004	0	0.034102	0.972765	889	2	6.7786
CYP21A2	3	0.86633	0.996322	18507	0	0.092372	0.994322	1701	2	6.7766
GFI1B	3	0.6478	0.996322	13471	1	0.059177	0.994322	1072	2	6.7766
MRPS10	3	0.8651	0.996322	18474	0	0.092372	0.994322	1708	2	6.7766
NBEAL2	3	0.31171	0.996322	6301	1	0.092372	0.994322	1702	2	6.7766
NFYA	3	0.96388	0.997574	20632	0	0.092372	0.994322	1706	2	6.7766
POC1A	3	0.72612	0.996322	15389	1	0.092372	0.994322	1705	2	6.7766
PPIB	3	0.78684	0.996322	16811	1	0.092372	0.994322	1703	2	6.7766
TSTA3	3	0.69342	0.996322	14567	1	0.092372	0.994322	1704	2	6.7766
ZEB2	3	0.53925	0.996322	10492	1	0.092372	0.994322	1707	2	6.7766
hsa-mir-3142	2	0.98387	0.998964	21049	0	0.030251	0.972765	793	2	6.7764
APITD1	3	0.92566	0.996322	19843	0	0.093263	0.994322	1723	2	6.7723
CNBD2	1	0.87733	0.996322	18731	0	0.12296	0.994322	4068	1	6.7723
SNAP23	3	0.62261	0.996322	12820	1	0.093263	0.994322	1722	2	6.7723
TATDN1	1	0.87733	0.996322	18732	0	0.12296	0.994322	4067	1	6.7723
IQCF3	3	0.62589	0.996322	12900	1	0.094133	0.994322	1746	2	6.7679
KCNN2	3	0.97409	0.998121	20852	0	0.065788	0.994322	1193	3	6.7679
MAP3K12	3	0.62988	0.996322	13013	1	0.094133	0.994322	1745	2	6.7679
MSRB1	1	0.87641	0.996322	18711	0	0.1239	0.994322	4095	1	6.7679
TNP1	3	0.28971	0.996322	5883	1	0.094133	0.994322	1744	2	6.7679
ACTRT1	3	0.58001	0.996322	11648	1	0.06418	0.994322	1163	2	6.7635
CD7	3	0.18924	0.984333	3615	1	0.095142	0.994322	1764	2	6.7635
DZIP3	3	0.94445	0.997045	20241	0	0.095142	0.994322	1762	2	6.7635
FKBP6	3	0.897	0.996322	19187	0	0.086649	0.994322	1568	2	6.7635
METTL1	3	0.99698	0.999632	21313	0	0.0084526	0.970617	148	3	6.7635
NDUFAF6	3	0.87905	0.996322	18776	0	0.095142	0.994322	1763	2	6.7635
RAPGEF6	1	0.87536	0.996322	18683	0	0.12491	0.994322	4120	1	6.7635
SLC22A25	3	0.64972	0.996322	13514	1	0.095142	0.994322	1765	2	6.7635
TAB2	3	0.76082	0.996322	16212	1	0.038176	0.972765	720	2	6.7635
ATP1B2	3	0.91132	0.996322	19504	0	0.096074	0.994322	1782	2	6.7592
C7orf61	3	0.21988	0.988835	4316	1	0.096074	0.994322	1780	2	6.7592
GFER	1	0.87436	0.996322	18661	0	0.12586	0.994322	4144	1	6.7592
KRTAP6-2	3	0.73278	0.996322	15537	1	0.096074	0.994322	1781	2	6.7592
PAPSS2	3	0.99445	0.999457	21260	0	0.015459	0.972765	279	3	6.7592
ZNF808	3	0.9894	0.99926	21159	0	0.028629	0.972765	520	3	6.7592
FOXF2	3	0.97688	0.998121	20914	0	0.059282	0.994322	1076	3	6.7548
HOXB8	3	0.92385	0.996322	19809	0	0.096822	0.994322	1798	2	6.7548
hsa-mir-4665	3	0.46472	0.996322	9028	1	0.096822	0.994322	1796	2	6.7548
KIF18B	3	0.12055	0.976462	2230	1	0.096822	0.994322	1797	2	6.7548
STX18	1	0.87356	0.996322	18648	0	0.12668	0.994322	4156	1	6.7548
SUMO3	3	0.95261	0.997574	20398	0	0.096822	0.994322	1799	2	6.7548
TFCP2L1	3	0.98649	0.999165	21095	0	0.035967	0.972765	668	3	6.7548
TMED3	1	0.87356	0.996322	18649	0	0.12668	0.994322	4157	1	6.7548
MTF2	2	0.97909	0.998361	20953	0	0.038875	0.972765	998	2	6.7523
PPP1R12B	2	0.98044	0.998545	20984	0	0.036428	0.972765	936	2	6.7518
DEFB124	3	0.92292	0.996322	19786	0	0.04451	0.972765	838	2	6.7503
DGUOK	3	0.60793	0.996322	12419	1	0.097485	0.994322	1810	2	6.7503
EFEMP2	3	0.88299	0.996322	18877	0	0.097485	0.994322	1809	2	6.7503
hsa-mir-6504	4	0.99637	0.999494	21306	0	0.012852	0.970617	172	4	6.7503
LAPTM4A	3	0.95186	0.997574	20378	0	0.06946	0.994322	1259	2	6.7503
SLC4A9	1	0.87286	0.996322	18634	0	0.12736	0.994322	4174	1	6.7503
SPANXN5	3	0.23993	0.993219	4772	1	0.097485	0.994322	1811	2	6.7503
HOXD11	3	0.99437	0.999457	21259	0	0.015689	0.972765	284	3	6.7459
hsa-mir-644a	3	0.97958	0.998361	20967	0	0.013687	0.972353	249	3	6.7459
HSFY2	1	0.87205	0.996322	18617	0	0.12813	0.994322	4198	1	6.7459
MAPK6	3	0.61597	0.996322	12634	1	0.098229	0.994322	1831	2	6.7459
OXTR	3	0.93922	0.996692	20133	0	0.053766	0.990448	989	2	6.7459
PMVK	3	0.68125	0.996322	14273	1	0.098229	0.994322	1830	2	6.7459
UQCRC1	3	0.64078	0.996322	13279	1	0.098229	0.994322	1832	2	6.7459
COL23A1	3	0.58433	0.996322	11762	1	0.099047	0.994322	1850	2	6.7415
HAPLN4	3	0.66234	0.996322	13796	1	0.099047	0.994322	1852	2	6.7415
MLLT10	3	0.58648	0.996322	11820	1	0.099047	0.994322	1851	2	6.7415
NXT2	3	0.81703	0.996322	17474	0	0.099047	0.994322	1848	2	6.7415
PIP4K2C	3	0.98053	0.998559	20986	0	0.050441	0.988529	927	3	6.7415
SLC10A2	3	0.87324	0.996322	18645	0	0.099047	0.994322	1849	2	6.7415
KCTD3	2	0.98014	0.998361	20980	0	0.036928	0.972765	944	2	6.7408
NDUFA7	2	0.97188	0.998121	20803	0	0.051765	0.988529	1284	2	6.7395
CLLU1OS	1	0.87039	0.996322	18583	0	0.12971	0.994322	4236	1	6.737
hsa-mir-629	1	0.87039	0.996322	18586	0	0.12971	0.994322	4237	1	6.737
OGFRL1	3	0.99772	0.999632	21328	0	0.0064221	0.970617	116	3	6.737
SDC1	3	0.68245	0.996322	14297	1	0.099803	0.994322	1862	2	6.737
TEX28	3	0.60363	0.996322	12300	1	0.099803	0.994322	1863	2	6.737
WDR93	3	0.61686	0.996322	12663	1	0.090215	0.994322	1656	2	6.737
hsa-mir-8054	2	0.97826	0.998361	20936	0	0.040398	0.972765	1032	2	6.7345
AVEN	3	0.64163	0.996322	13305	1	0.10048	0.994322	1871	2	6.7325
CRTC3	1	0.86968	0.996322	18573	0	0.13044	0.994322	4247	1	6.7325
GNA14	3	0.71269	0.996322	15060	1	0.052741	0.990448	972	2	6.7325
NOTCH1	1	0.86968	0.996322	18574	0	0.13044	0.994322	4246	1	6.7325
ALAD	3	0.78221	0.996322	16702	1	0.10118	0.994322	1882	2	6.7281
CASC4	1	0.86902	0.996322	18554	0	0.13114	0.994322	4273	1	6.7281
CXorf40A	3	0.82805	0.996322	17717	0	0.040895	0.972765	771	2	6.7281
FAM212A	3	0.87641	0.996322	18716	0	0.10118	0.994322	1883	2	6.7281
HNRNPA3	1	0.86902	0.996322	18555	0	0.13114	0.994322	4272	1	6.7281
NELL1	1	0.86902	0.996322	18553	0	0.13114	0.994322	4274	1	6.7281
SRPX2	3	0.7808	0.996322	16674	1	0.10118	0.994322	1884	2	6.7281
KDELR2	3	0.67719	0.996322	14152	1	0.038671	0.972765	728	2	6.7236
PPP2R5E	3	0.98203	0.998847	21012	0	0.046922	0.981813	876	3	6.7236
PROSC	3	0.99618	0.999476	21300	0	0.010788	0.970617	187	3	6.7211
GCK	3	0.48104	0.996322	9320	1	0.0055975	0.970617	100	2	6.719
GPR45	3	0.95139	0.997574	20368	0	0.049898	0.988529	925	2	6.719
KIF18A	3	0.94051	0.996748	20164	0	0.1026	0.994322	1914	2	6.719
NANOS2	3	0.9715	0.998121	20796	0	0.071818	0.994322	1299	3	6.719
RNF150	3	0.44963	0.996322	8765	1	0.1026	0.994322	1915	2	6.719
RPS25	3	0.44963	0.996322	8758	1	0.1026	0.994322	1916	2	6.719
STMN2	3	0.97393	0.998121	20848	0	0.066179	0.994322	1197	3	6.719
TCERG1	3	0.78435	0.996322	16751	1	0.1026	0.994322	1917	2	6.719
ACTRT3	2	0.97867	0.998361	20947	0	0.039611	0.972765	1012	2	6.718
FAM65A	2	0.97847	0.998361	20940	0	0.040014	0.972765	1022	2	6.7151
ARSK	3	0.4632	0.996322	9005	1	0.095876	0.994322	1776	2	6.7145
GTF2H5	3	0.95439	0.997574	20435	0	0.10338	0.994322	1930	2	6.7145
IMPACT	3	0.91926	0.996322	19699	0	0.10338	0.994322	1932	2	6.7145
LACE1	1	0.86686	0.996322	18511	0	0.13328	0.994322	4325	1	6.7145
SETD8	3	0.64686	0.996322	13439	1	0.10338	0.994322	1933	2	6.7145
SHOX2	3	0.9896	0.99926	21162	0	0.028096	0.972765	511	3	6.7145
SFTPD	2	0.98212	0.998847	21013	0	0.033351	0.972765	874	2	6.7123
PRKAG3	3	0.64348	0.996322	13346	1	0.10402	0.994322	1947	2	6.71
TAS2R43	3	0.65159	0.996322	13551	1	0.10402	0.994322	1946	2	6.71
ZFR	3	0.79046	0.996322	16899	1	0.10402	0.994322	1945	2	6.71
BEST2	3	0.9935	0.999457	21238	0	0.018071	0.972765	333	3	6.7054
IGFLR1	1	0.86564	0.996322	18483	0	0.13449	0.994322	4350	1	6.7054
ITPKB	3	0.13393	0.976462	2504	1	0.10457	0.994322	1959	2	6.7054
STOX2	1	0.86564	0.996322	18485	0	0.13449	0.994322	4348	1	6.7054
TTL	3	0.77852	0.996322	16618	1	0.073055	0.994322	1316	2	6.7054
YIPF1	3	0.58433	0.996322	11750	1	0.10457	0.994322	1958	2	6.7054
ZNF689	1	0.86564	0.996322	18484	0	0.13449	0.994322	4349	1	6.7054
ZNF384	2	0.97602	0.998121	20889	0	0.044486	0.972765	1120	2	6.7053
UBOX5	2	0.97685	0.998121	20912	0	0.042981	0.972765	1081	2	6.7045
C11orf40	3	0.94053	0.996748	20165	0	0.10382	0.994322	1942	2	6.7009
CGNL1	3	0.43161	0.996322	8456	1	0.10506	0.994322	1966	2	6.7009
HOOK2	3	0.989	0.99926	21149	0	0.029648	0.972765	537	3	6.7009
PTPN22	3	0.88938	0.996322	19030	0	0.10506	0.994322	1964	2	6.7009
SPATA3	3	0.84738	0.996322	18102	0	0.10506	0.994322	1965	2	6.7009
TRIM25	1	0.86514	0.996322	18468	0	0.13502	0.994322	4364	1	6.7009
DPP7	3	0.76929	0.996322	16408	1	0.1056	0.994322	1974	2	6.6963
KARS	3	0.99307	0.999457	21228	0	0.019142	0.972765	357	3	6.6963
MAL	3	0.85463	0.996322	18267	0	0.1056	0.994322	1975	2	6.6963
SUGP1	3	0.98905	0.99926	21153	0	0.029526	0.972765	531	3	6.6963
ZNF205	3	0.97049	0.998121	20781	0	0.074159	0.994322	1331	3	6.6963
ANLN	3	0.27796	0.994862	5611	1	0.10623	0.994322	1988	2	6.6917
CLEC11A	3	0.86487	0.996322	18471	0	0.10623	0.994322	1987	2	6.6917
LY9	1	0.86398	0.996322	18445	0	0.13615	0.994322	4394	1	6.6917
PARS2	3	0.67719	0.996322	14171	1	0.10623	0.994322	1989	2	6.6917
TMEM88B	3	0.99532	0.999463	21277	0	0.013178	0.970617	238	3	6.6917
GC	3	0.47984	0.996322	9300	1	0.10698	0.994322	2000	2	6.6871
hsa-mir-24-2	3	0.90929	0.996322	19450	0	0.10698	0.994322	2004	2	6.6871
hsa-mir-4268	3	0.86393	0.996322	18450	0	0.10698	0.994322	2002	2	6.6871
PTCD2	3	0.67719	0.996322	14148	1	0.10698	0.994322	2003	2	6.6871
USP32	3	0.55568	0.996322	10911	1	0.10698	0.994322	1999	2	6.6871
ZDHHC12	3	0.76827	0.996322	16377	1	0.10698	0.994322	2001	2	6.6871
DNAJC11	2	0.97775	0.998353	20931	0	0.041398	0.972765	1048	2	6.6867
C9orf123	3	0.5671	0.996322	11235	1	0.1077	0.994322	2017	2	6.6824
hsa-mir-4311	3	0.56469	0.996322	11182	1	0.1077	0.994322	2018	2	6.6824
PLS3	3	0.99325	0.999457	21233	0	0.018725	0.972765	344	3	6.6824
RFT1	3	0.99092	0.99926	21187	0	0.024666	0.972765	461	3	6.6824
SH3GLB1	3	0.87568	0.996322	18694	0	0.042905	0.972765	805	2	6.6824
DDR1	3	0.98664	0.999165	21099	0	0.035578	0.972765	660	3	6.6778
LDLRAD4	3	0.88069	0.996322	18815	0	0.08272	0.994322	1490	2	6.6778
OR6N2	3	0.47345	0.996322	9191	1	0.10826	0.994322	2025	2	6.6778
ARF5	3	0.51119	0.996322	9895	1	0.10869	0.994322	2033	2	6.6731
FAM222B	3	0.17994	0.984333	3395	1	0.10869	0.994322	2032	2	6.6731
FAM83H	3	0.99071	0.99926	21181	0	0.025197	0.972765	470	3	6.6731
HNRNPUL1	3	0.98564	0.999165	21072	0	0.03803	0.972765	716	3	6.6731
WWP2	3	0.86791	0.996322	18540	0	0.10869	0.994322	2031	2	6.6731
ALG13	3	0.93532	0.996379	20061	0	0.10922	0.994322	2047	2	6.6685
CCL1	3	0.31672	0.996322	6383	1	0.033579	0.972765	621	2	6.6685
hsa-mir-599	3	0.79562	0.996322	17007	1	0.10922	0.994322	2045	2	6.6685
SYCE1L	3	0.63998	0.996322	13267	1	0.10922	0.994322	2046	2	6.6685
TBX19	3	0.69425	0.996322	14583	1	0.10922	0.994322	2049	2	6.6685
XRCC6	3	0.31171	0.996322	6302	1	0.043576	0.972765	817	2	6.6685
ZNF366	3	0.82664	0.996322	17689	0	0.10922	0.994322	2048	2	6.6685
TRMT2A	2	0.97999	0.998361	20976	0	0.037221	0.972765	956	2	6.666
ABCD4	3	0.77434	0.996322	16513	1	0.10979	0.994322	2056	2	6.6638
HOXA9	3	0.88904	0.996322	19024	0	0.080977	0.994322	1457	2	6.6638
KRT24	3	0.97325	0.998121	20827	0	0.067752	0.994322	1234	3	6.6638
VDAC3	3	0.65481	0.996322	13623	1	0.10979	0.994322	2055	2	6.6638
CLCNKB	3	0.82173	0.996322	17571	0	0.11042	0.994322	2065	2	6.6591
LHB	3	0.95624	0.997574	20467	0	0.11042	0.994322	2068	2	6.6591
PRAMEF11	3	0.87721	0.996322	18735	0	0.11042	0.994322	2067	2	6.6591
RAF1	3	0.96511	0.997574	20667	0	0.11042	0.994322	2064	2	6.6591
SP140L	3	0.96356	0.997574	20619	0	0.11042	0.994322	2066	2	6.6591
ATF7	3	0.95576	0.997574	20458	0	0.11096	0.994322	2080	2	6.6544
NFKBIE	3	0.21017	0.987402	4070	1	0.11096	0.994322	2081	2	6.6544
POLRMT	3	0.5923	0.996322	11968	1	0.11096	0.994322	2077	2	6.6544
SNX27	3	0.88128	0.996322	18825	0	0.11096	0.994322	2079	2	6.6544
TMPRSS7	3	0.95799	0.997574	20501	0	0.11096	0.994322	2078	2	6.6544
COL21A1	3	0.47065	0.996322	9145	1	0.11144	0.994322	2094	2	6.6496
HTR2C	3	0.64348	0.996322	13350	1	0.11144	0.994322	2095	2	6.6496
KMT2A	3	0.98472	0.999165	21060	0	0.040354	0.972765	760	3	6.6496
MSC	3	0.24673	0.993219	4934	1	0.11144	0.994322	2093	2	6.6496
OR13C4	3	0.92552	0.996322	19840	0	0.11144	0.994322	2096	2	6.6496
PDCD10	3	0.70409	0.996322	14810	1	0.11144	0.994322	2092	2	6.6496
RASGEF1B	1	0.85899	0.996322	18346	0	0.14113	0.994322	4510	1	6.6496
ADAMTS19	3	0.91947	0.996322	19707	0	0.014068	0.972765	257	2	6.6449
CNOT2	3	0.69386	0.996322	14578	1	0.038176	0.972765	719	2	6.6449
GRID2IP	3	0.61297	0.996322	12566	1	0.11201	0.994322	2109	2	6.6449
KRTAP10-5	3	0.76692	0.996322	16340	1	0.11201	0.994322	2106	2	6.6449
MAST3	3	0.98438	0.999101	21057	0	0.041182	0.972765	774	3	6.6449
SENP1	3	0.59044	0.996322	11902	1	0.11201	0.994322	2110	2	6.6449
SH3PXD2A	3	0.88315	0.996322	18879	0	0.11201	0.994322	2107	2	6.6449
SYCP2	3	0.80871	0.996322	17298	0	0.11201	0.994322	2108	2	6.6449
FLRT1	3	0.93785	0.996611	20111	0	0.11261	0.994322	2122	2	6.6401
MRFAP1	3	0.94835	0.997574	20315	0	0.11261	0.994322	2120	2	6.6401
TMX2	3	0.63386	0.996322	13102	1	0.11261	0.994322	2121	2	6.6401
ZBTB47	3	0.99039	0.99926	21177	0	0.026053	0.972765	479	3	6.6401
GSN	3	0.8644	0.996322	18459	0	0.11318	0.994322	2132	2	6.6353
KLLN	3	0.87592	0.996322	18702	0	0.11318	0.994322	2130	2	6.6353
NUBP2	3	0.88634	0.996322	18955	0	0.11318	0.994322	2131	2	6.6353
RPL13A	3	0.87874	0.996322	18769	0	0.11318	0.994322	2133	2	6.6353
SERAC1	3	0.57384	0.996322	11456	1	0.026752	0.972765	493	2	6.6353
SOAT1	3	0.72533	0.996322	15378	1	0.029838	0.972765	540	2	6.6353
GPR56	1	0.85683	0.996322	18309	0	0.14327	0.994322	4562	1	6.6305
hsa-mir-6887	1	0.85683	0.996322	18308	0	0.14327	0.994322	4563	1	6.6305
ZC3H12A	2	0.97671	0.998121	20908	0	0.043232	0.972765	1087	2	6.6271
GGPS1	3	0.9888	0.99926	21140	0	0.030176	0.972765	554	3	6.6257
OR11H12	1	0.85645	0.996322	18302	0	0.14369	0.994322	4569	1	6.6257
PIKFYVE	1	0.85645	0.996322	18301	0	0.14369	0.994322	4568	1	6.6257
hsa-mir-1295a	3	0.99311	0.999457	21230	0	0.019036	0.972765	354	3	6.6209
MAX	1	0.85616	0.996322	18296	0	0.144	0.994322	4572	1	6.6209
INHA	2	0.97648	0.998121	20902	0	0.043656	0.972765	1099	2	6.6185
FAM13A	3	0.41948	0.996322	8232	1	0.11483	0.994322	2159	2	6.616
HIST1H4B	3	0.68377	0.996322	14332	1	0.11483	0.994322	2160	2	6.616
KIAA0226L	1	0.85577	0.996322	18292	0	0.14439	0.994322	4588	1	6.616
MYBPC1	3	0.85863	0.996322	18347	0	0.11483	0.994322	2161	2	6.616
TMEM105	3	0.96165	0.997574	20572	0	0.022376	0.972765	415	2	6.616
GABRA2	1	0.85535	0.996322	18279	0	0.1448	0.994322	4594	1	6.6112
OTUD6B	3	0.92984	0.996322	19936	0	0.11526	0.994322	2169	2	6.6112
TWIST1	3	0.70434	0.996322	14817	1	0.11526	0.994322	2170	2	6.6112
CUL4A	3	0.99515	0.999463	21274	0	0.013653	0.972353	247	3	6.6063
hsa-mir-545	3	0.97998	0.998361	20978	0	0.051741	0.988529	946	3	6.6063
RAB23	3	0.81841	0.996322	17495	0	0.11565	0.994322	2178	2	6.6063
TPBG	1	0.855	0.996322	18270	0	0.14516	0.994322	4606	1	6.6063
MTHFD1L	3	0.59044	0.996322	11914	1	0.11603	0.994322	2188	2	6.6014
OR9I1	3	0.96888	0.997847	20751	0	0.077912	0.994322	1389	3	6.6014
LOC152586	3	0.99053	0.99926	21179	0	0.025671	0.972765	475	3	6.5965
HADH	3	0.61597	0.996322	12636	1	0.11684	0.994322	2210	2	6.5916
PCDP1	3	0.92659	0.996322	19860	0	0.11684	0.994322	2209	2	6.5916
PHACTR2	3	0.98905	0.99926	21152	0	0.029531	0.972765	532	3	6.5916
VEGFB	1	0.85392	0.996322	18243	0	0.14624	0.994322	4632	1	6.5916
APOL2	3	0.7524	0.996322	16013	1	0.11728	0.994322	2222	2	6.5866
EXOC5	1	0.85352	0.996322	18235	0	0.14664	0.994322	4644	1	6.5866
GRID1	3	0.98352	0.998901	21041	0	0.043231	0.972765	806	3	6.5866
NIPAL1	1	0.85352	0.996322	18236	0	0.14664	0.994322	4645	1	6.5866
THAP11	3	0.72486	0.996322	15363	1	0.11728	0.994322	2221	2	6.5866
PAX5	3	0.98812	0.99926	21126	0	0.031941	0.972765	595	3	6.5817
POTEF	1	0.8532	0.996322	18231	0	0.14699	0.994322	4654	1	6.5817
DKC1	2	0.97766	0.998309	20929	0	0.041577	0.972765	1050	2	6.581
C14orf1	3	0.54516	0.996322	10612	1	0.118	0.994322	2234	2	6.5767
hsa-mir-6750	3	0.81291	0.996322	17381	0	0.118	0.994322	2235	2	6.5767
hsa-mir-7110	1	0.85283	0.996322	18219	0	0.14735	0.994322	4660	1	6.5767
PSG2	3	0.99573	0.999463	21287	0	0.012042	0.970617	216	3	6.5767
SGSM2	1	0.85283	0.996322	18218	0	0.14735	0.994322	4663	1	6.5767
BCL2L10	1	0.85246	0.996322	18209	0	0.1477	0.994322	4671	1	6.5717
FAM47E-STBD1	1	0.85246	0.996322	18210	0	0.1477	0.994322	4672	1	6.5717
TRIM5	3	0.97073	0.998121	20784	0	0.049445	0.988529	913	3	6.5717
INSC	1	0.85214	0.996322	18202	0	0.14801	0.994322	4682	1	6.5667
LRRTM2	1	0.85214	0.996322	18204	0	0.14801	0.994322	4680	1	6.5667
SCAMP2	3	0.53368	0.996322	10343	1	0.11871	0.994322	2246	2	6.5667
CASP1	3	0.60059	0.996322	12199	1	0.11909	0.994322	2260	2	6.5616
CNGA1	3	0.938	0.996619	20113	0	0.11909	0.994322	2262	2	6.5616
COL4A6	3	0.32647	0.996322	6550	1	0.11909	0.994322	2259	2	6.5616
DSPP	3	0.59044	0.996322	11897	1	0.11909	0.994322	2261	2	6.5616
ETV1	3	0.4745	0.996322	9205	1	0.11909	0.994322	2258	2	6.5616
NUS1	1	0.85178	0.996322	18196	0	0.14835	0.994322	4687	1	6.5616
SNAI1	3	0.86462	0.996322	18462	0	0.1022	0.994322	1907	2	6.5616
CLK1	2	0.9757	0.998121	20883	0	0.045019	0.972765	1135	2	6.559
PPP1R16A	2	0.97667	0.998121	20906	0	0.043315	0.972765	1091	2	6.5588
CCNL2	3	0.69282	0.996322	14552	1	0.1197	0.994322	2269	2	6.5515
hsa-mir-5706	3	0.37232	0.996322	7402	1	0.1197	0.994322	2268	2	6.5515
SLC5A8	3	0.87421	0.996322	18662	0	0.1197	0.994322	2267	2	6.5515
SUSD2	3	0.85861	0.996322	18344	0	0.1197	0.994322	2270	2	6.5515
TMEM100	3	0.67719	0.996322	14149	1	0.11494	0.994322	2165	2	6.5515
FAM189A2	3	0.9499	0.997574	20347	0	0.12002	0.994322	2280	2	6.5465
OR6C75	1	0.85089	0.996322	18175	0	0.1492	0.994322	4713	1	6.5465
hsa-mir-302a	4	0.93427	0.996322	20043	0	0.043472	0.972765	708	3	6.5458
HYI	1	0.8506	0.996322	18167	0	0.14953	0.994322	4717	1	6.5413
MS4A7	1	0.8506	0.996322	18166	0	0.14953	0.994322	4718	1	6.5413
SGSH	3	0.7347	0.996322	15583	1	0.12036	0.994322	2286	2	6.5413
RAB11B	3	0.92016	0.996322	19721	0	0.10245	0.994322	1910	2	6.5362
hsa-mir-523	2	0.97422	0.998121	20855	0	0.047596	0.981875	1190	2	6.5328
CHMP2B	3	0.99455	0.999457	21265	0	0.01522	0.972765	274	3	6.5311
OR2M4	3	0.94104	0.996752	20175	0	0.087289	0.994322	1586	2	6.5311
RAET1E	3	0.97152	0.998121	20798	0	0.071771	0.994322	1297	3	6.5311
SAMD13	3	0.78825	0.996322	16845	1	0.12108	0.994322	2303	2	6.5311
SFT2D2	3	0.53925	0.996322	10484	1	0.12108	0.994322	2302	2	6.5311
4-Mar	3	0.97543	0.998121	20878	0	0.062681	0.994322	1145	3	6.5259
MAPRE2	3	0.56234	0.996322	11102	1	0.12141	0.994322	2308	2	6.5259
TNNI3K	1	0.84963	0.996322	18148	0	0.1505	0.994322	4736	1	6.5259
AGAP9	1	0.84934	0.996322	18141	0	0.15081	0.994322	4750	1	6.5208
GALP	3	0.99561	0.999463	21282	0	0.012401	0.970617	223	3	6.5208
hsa-mir-5583-1	3	0.97558	0.998121	20882	0	0.062344	0.994322	1136	3	6.5208
LTB	1	0.84934	0.996322	18140	0	0.15081	0.994322	4749	1	6.5208
DSTN	3	0.83644	0.996322	17883	0	0.12205	0.994322	2314	2	6.5156
hsa-mir-99b	3	0.98371	0.998901	21046	0	0.042781	0.972765	800	3	6.5156
SSR3	1	0.84904	0.996322	18132	0	0.15112	0.994322	4755	1	6.5156
hsa-mir-1257	3	0.9309	0.996322	19964	0	0.12233	0.994322	2318	2	6.5104
MACC1	3	0.70811	0.996322	14921	1	0.12233	0.994322	2319	2	6.5104
CAPNS2	3	0.92091	0.996322	19735	0	0.12263	0.994322	2330	2	6.5051
GRM6	1	0.8485	0.996322	18117	0	0.15165	0.994322	4767	1	6.5051
PCDHA9	1	0.8485	0.996322	18120	0	0.15165	0.994322	4765	1	6.5051
ROS1	1	0.8485	0.996322	18118	0	0.15165	0.994322	4766	1	6.5051
SSR4	3	0.79184	0.996322	16934	1	0.12263	0.994322	2329	2	6.5051
TNIK	3	0.3207	0.996322	6443	1	0.12263	0.994322	2328	2	6.5051
LCN10	3	0.70671	0.996322	14881	1	0.12296	0.994322	2333	2	6.4999
MPC1L	3	0.56006	0.996322	11047	1	0.12319	0.994322	2337	2	6.4946
hsa-mir-3610	4	0.53391	0.996322	10056	1	0.046024	0.978399	768	3	6.4935
hsa-mir-4324	3	0.87668	0.996322	18721	0	0.12335	0.994322	2342	2	6.4893
C3orf35	2	0.97429	0.998121	20856	0	0.047455	0.981813	1188	2	6.4881
CLPP	3	0.97809	0.998361	20935	0	0.056339	0.994322	1037	3	6.484
SH2D4A	3	0.26236	0.994862	5247	1	0.11074	0.994322	2074	2	6.484
SLITRK6	3	0.98854	0.99926	21137	0	0.030875	0.972765	572	3	6.484
CXCL14	3	0.59908	0.996322	12149	1	0.12384	0.994322	2349	2	6.4787
ANAPC13	3	0.51728	0.996322	10029	1	0.12405	0.994322	2353	2	6.4733
MTA2	3	0.98139	0.998797	20997	0	0.048383	0.98809	899	3	6.468
RAPH1	2	0.97457	0.998121	20862	0	0.047005	0.981813	1178	2	6.4675
KCNH5	2	0.97566	0.998121	20881	0	0.045098	0.972765	1137	2	6.4668
MSRB2	3	0.77799	0.996322	16603	1	0.12441	0.994322	2362	2	6.4626
RABGAP1	3	0.95239	0.997574	20394	0	0.12441	0.994322	2361	2	6.4626
CWC15	3	0.68424	0.996322	14343	1	0.12465	0.994322	2367	2	6.4572
NPFFR2	3	0.81568	0.996322	17441	0	0.12465	0.994322	2366	2	6.4572
MFAP2	1	0.8465	0.996322	18091	0	0.15365	0.994322	4822	1	6.4517
ALG1	3	0.89463	0.996322	19131	0	0.12498	0.994322	2372	2	6.4463
LIG1	3	0.99578	0.999463	21289	0	0.011883	0.970617	210	3	6.4463
PUF60	3	0.62988	0.996322	13007	1	0.12498	0.994322	2373	2	6.4463
DUSP11	2	0.97422	0.998121	20854	0	0.047596	0.981875	1191	2	6.4431
hsa-mir-27b	4	0.86899	0.996322	18536	1	0.043329	0.972765	704	3	6.4409
EGR2	3	0.80733	0.996322	17274	1	0.12517	0.994322	2375	2	6.4408
CCR9	2	0.97399	0.998121	20846	0	0.048038	0.986746	1199	2	6.4379
USP14	2	0.97339	0.998121	20828	0	0.049099	0.98809	1230	2	6.4368
UBXN2B	3	0.69708	0.996322	14653	1	0.12538	0.994322	2379	2	6.4353
hsa-mir-3121	3	0.45456	0.996322	8854	1	0.12562	0.994322	2386	2	6.4298
SLC25A19	1	0.84575	0.996322	18073	0	0.15437	0.994322	4832	1	6.4298
SLPI	3	0.80508	0.996322	17219	1	0.054855	0.992685	1009	2	6.4298
WNT16	3	0.93312	0.996322	20012	0	0.12562	0.994322	2385	2	6.4298
ATP5I	1	0.84558	0.996322	18063	0	0.15453	0.994322	4836	1	6.4243
TYRO3	3	0.78266	0.996322	16715	1	0.12604	0.994322	2391	2	6.4187
GALNT14	2	0.97352	0.998121	20832	0	0.048883	0.98809	1223	2	6.418
FAM13C	3	0.97411	0.998121	20853	0	0.065749	0.994322	1192	3	6.4132
IRX1	3	0.73422	0.996322	15570	1	0.12624	0.994322	2396	2	6.4132
TACSTD2	3	0.51119	0.996322	9893	1	0.056539	0.994322	1040	2	6.4132
PDCD2L	2	0.97301	0.998121	20822	0	0.049782	0.988529	1242	2	6.4098
ZMIZ1	1	0.84506	0.996322	18052	0	0.15502	0.994322	4854	1	6.4076
PLEKHG6	3	0.1402	0.978361	2603	1	0.12655	0.994322	2398	2	6.4019
RASSF6	1	0.84492	0.996322	18048	0	0.15516	0.994322	4857	1	6.4019
ROGDI	3	0.24673	0.993219	4936	1	0.12655	0.994322	2399	2	6.4019
FADS6	3	0.7974	0.996322	17062	1	0.12696	0.994322	2410	2	6.3906
LRFN2	3	0.67719	0.996322	14136	1	0.12696	0.994322	2411	2	6.3906
NRSN1	3	0.60059	0.996322	12196	1	0.12696	0.994322	2412	2	6.3906
AEBP2	3	0.6619	0.996322	13789	1	0.12711	0.994322	2416	2	6.385
BACE2	3	0.21171	0.987402	4093	1	0.12711	0.994322	2415	2	6.385
hsa-mir-3119-1	4	0.82429	0.996322	17294	1	0.046506	0.981813	775	3	6.3817
HIVEP1	3	0.74618	0.996322	15864	1	0.12734	0.994322	2421	2	6.3792
hsa-mir-4660	3	0.91721	0.996322	19643	0	0.060231	0.994322	1097	2	6.3792
CALN1	3	0.88479	0.996322	18918	0	0.12762	0.994322	2427	2	6.3678
SYT1	3	0.90396	0.996322	19329	0	0.12762	0.994322	2425	2	6.3678
LRRC16B	2	0.97292	0.998121	20820	0	0.049929	0.988529	1245	2	6.3609
LURAP1L	3	0.99451	0.999457	21264	0	0.015316	0.972765	276	3	6.3562
hsa-mir-4659a	3	0.58648	0.996322	11806	1	0.12803	0.994322	2434	2	6.3504
HSPB11	3	0.95968	0.997574	20538	0	0.12803	0.994322	2435	2	6.3504
DBR1	2	0.97058	0.998121	20780	0	0.054074	0.990448	1332	2	6.347
hsa-mir-3171	2	0.97191	0.998121	20805	0	0.051715	0.988529	1282	2	6.3468
HRASLS	3	0.97131	0.998121	20792	0	0.054855	0.992685	1008	3	6.3445
MOB1A	3	0.99233	0.999457	21216	0	0.021015	0.972765	391	3	6.3328
EOMES	2	0.9737	0.998121	20840	0	0.04852	0.98809	1214	2	6.331
HSBP1	3	0.39828	0.996322	7833	1	0.12874	0.994322	2453	2	6.3268
SCHIP1	1	0.84292	0.996322	18010	0	0.15711	0.994322	4901	1	6.3268
BPIFB1	3	0.9671	0.997574	20713	0	0.12902	0.994322	2459	2	6.3149
RPL10	3	0.26741	0.994862	5369	1	0.12902	0.994322	2458	2	6.3149
SUGP2	3	0.90404	0.996322	19331	0	0.12916	0.994322	2460	2	6.3089
CD2BP2	2	0.97233	0.998121	20812	0	0.050968	0.988529	1268	2	6.3073
CAMK1	3	0.37863	0.996322	7510	1	0.12933	0.994322	2469	2	6.3029
GPS2	3	0.91658	0.996322	19629	0	0.12933	0.994322	2467	2	6.3029
NEK5	3	0.9613	0.997574	20566	0	0.12933	0.994322	2468	2	6.3029
EFCAB3	2	0.97339	0.998121	20829	0	0.049099	0.98809	1231	2	6.3014
PSMD5	3	0.6304	0.996322	13026	1	0.12942	0.994322	2471	2	6.2969
hsa-mir-2278	4	0.79427	0.996322	16258	1	0.049538	0.988529	836	3	6.293
ICT1	3	0.9656	0.997574	20682	0	0.12964	0.994322	2478	2	6.2847
IL36RN	3	0.54722	0.996322	10674	1	0.12964	0.994322	2477	2	6.2847
NCAN	3	0.88341	0.996322	18883	0	0.12964	0.994322	2476	2	6.2847
IKBKAP	1	0.84198	0.996322	17990	0	0.15806	0.994322	4926	1	6.2786
FAM150B	3	0.79088	0.996322	16911	1	0.12996	0.994322	2486	2	6.2724
FAM86C1	3	0.85847	0.996322	18342	0	0.12996	0.994322	2485	2	6.2724
RLN2	1	0.84549	0.996322	18060	0	0.1546	0.994322	4838	1	6.2656
ELOVL2	3	0.3384	0.996322	6769	1	0.1307	0.994322	2493	2	6.235
hsa-let-7e	3	0.42956	0.996322	8419	1	0.13081	0.994322	2500	2	6.2287
BDKRB2	3	0.98868	0.99926	21138	0	0.030484	0.972765	561	3	6.2223
TTYH1	2	0.97761	0.998302	20927	0	0.041666	0.972765	1053	2	6.2192
TBCB	3	0.76054	0.996322	16203	1	0.131	0.994322	2504	2	6.2159
TTC30B	3	0.78515	0.996322	16774	1	0.13111	0.994322	2505	2	6.2095
COL1A1	3	0.93187	0.996322	19983	0	0.068128	0.994322	1236	2	6.2031
PEX10	3	0.90945	0.996322	19457	0	0.13127	0.994322	2506	2	6.2031
HERPUD1	3	0.9282	0.996322	19898	0	0.13138	0.994322	2512	2	6.1966
FBXL4	2	0.97101	0.998121	20787	0	0.053304	0.990448	1318	2	6.187
KRTAP26-1	2	0.97196	0.998121	20806	0	0.051646	0.988529	1281	2	6.1866
NME9	3	0.90657	0.996322	19390	0	0.10338	0.994322	1931	2	6.1815
KIAA0319L	3	0.63536	0.996322	13144	1	0.13163	0.994322	2522	2	6.177
HMGB4	3	0.96466	0.997574	20653	0	0.13173	0.994322	2524	2	6.1704
TSPYL5	2	0.97436	0.998121	20857	0	0.047339	0.981813	1184	2	6.1698
C20orf26	2	0.97164	0.998121	20797	0	0.05222	0.988529	1298	2	6.1667
LRMP	3	0.75723	0.996322	16123	1	0.001863	0.956958	33	2	6.1638
PVRL3	2	0.97019	0.998121	20769	0	0.054774	0.992685	1346	2	6.1626
ALDH3B1	3	0.92758	0.996322	19886	0	0.13191	0.994322	2529	2	6.1571
BBS2	1	0.83997	0.996322	17953	0	0.16015	0.994322	4962	1	6.1437
hsa-mir-513b	3	0.85523	0.996322	18286	0	0.13211	0.994322	2530	2	6.1437
DAOA	2	0.97158	0.998121	20795	0	0.052315	0.988529	1301	2	6.1405
ADAMTS7	3	0.58001	0.996322	11623	1	0.11762	0.994322	2228	2	6.1342
SLITRK2	3	0.78719	0.996322	16821	1	0.11344	0.994322	2139	2	6.1302
CSF3R	1	0.83957	0.996322	17944	0	0.16057	0.994322	4973	1	6.1234
OR1L3	3	0.98268	0.998901	21021	0	0.045314	0.972765	853	3	6.1234
FJX1	3	0.85425	0.996322	18257	0	0.13276	0.994322	2539	2	6.1165
PRKCI	3	0.97634	0.998121	20900	0	0.060572	0.994322	1102	3	6.1096
C16orf92	3	0.55157	0.996322	10806	1	0.13319	0.994322	2546	2	6.0958
CACNG6	3	0.92345	0.996322	19799	0	0.13319	0.994322	2545	2	6.0958
CLIP1	3	0.72268	0.996322	15311	1	0.13361	0.994322	2553	2	6.0677
NIT1	3	0.807	0.996322	17267	1	0.065912	0.994322	1195	2	6.0677
KDM8	3	0.99314	0.999457	21231	0	0.018977	0.972765	351	3	6.039
CCDC41	3	0.9869	0.999194	21108	0	0.034914	0.972765	642	3	6.0317
KRT79	3	0.73661	0.996322	15638	1	0.13458	0.994322	2571	2	6.0245
REG1A	3	0.63244	0.996322	13069	1	0.13475	0.994322	2578	2	6.0171
ZNF865	3	0.93829	0.996678	20120	0	0.13475	0.994322	2579	2	6.0171
WLS	2	0.97444	0.998121	20859	0	0.047206	0.981813	1182	2	6.0169
NUB1	3	0.72033	0.996322	15253	1	0.13167	0.994322	2523	2	6.0137
LRRN4CL	3	0.99354	0.999457	21239	0	0.017925	0.972765	329	3	6.0098
EIF5	3	0.70602	0.996322	14857	1	0.13504	0.994322	2587	2	6.0023
hsa-mir-5196	3	0.98126	0.998797	20995	0	0.048689	0.98809	902	3	6.0023
IVNS1ABP	3	0.75402	0.996322	16058	1	0.13504	0.994322	2588	2	6.0023
HID1	3	0.82511	0.996322	17648	0	0.13519	0.994322	2593	2	5.9949
NTNG2	1	0.83728	0.996322	17894	0	0.1628	0.994322	5029	1	5.9949
CAMSAP1	3	0.55359	0.996322	10860	1	0.13544	0.994322	2598	2	5.9874
GSX2	1	0.83706	0.996322	17887	0	0.16303	0.994322	5034	1	5.9874
C12orf4	2	0.96433	0.997574	20640	0	0.0027016	0.956958	73	2	5.9755
CTSB	3	0.97592	0.998121	20888	0	0.061549	0.994322	1121	3	5.9723
LRRK1	3	0.78726	0.996322	16824	1	0.13616	0.994322	2610	2	5.9647
POLR3A	3	0.67719	0.996322	14137	1	0.13616	0.994322	2611	2	5.9647
BLOC1S2	3	0.20153	0.986719	3878	1	0.13638	0.994322	2617	2	5.9571
RRP8	1	0.83623	0.996322	17872	0	0.16387	0.994322	5061	1	5.9571
CEP250	3	0.93064	0.996322	19956	0	0.13676	0.994322	2623	2	5.9339
STX2	3	0.76753	0.996322	16355	1	0.13676	0.994322	2624	2	5.9339
hsa-mir-510	3	0.60208	0.996322	12233	1	0.13698	0.994322	2627	2	5.9261
hsa-mir-6079	3	0.56234	0.996322	11095	1	0.13698	0.994322	2628	2	5.9261
PCBP4	3	0.94547	0.997203	20263	0	0.13698	0.994322	2629	2	5.9261
BAG4	1	0.83546	0.996322	17855	0	0.16464	0.994322	5075	1	5.9183
CSTA	3	0.78115	0.996322	16682	1	0.13722	0.994322	2631	2	5.9183
RPS8	3	0.95233	0.997574	20391	0	0.12147	0.994322	2310	2	5.9183
CSH2	3	0.61686	0.996322	12669	1	0.13771	0.994322	2644	2	5.8944
PRAMEF4	3	0.97376	0.998121	20844	0	0.066538	0.994322	1203	3	5.8944
SAMSN1	3	0.8878	0.996322	18990	0	0.13779	0.994322	2651	2	5.8864
TIA1	3	0.081412	0.976462	1518	1	0.13779	0.994322	2652	2	5.8864
SOWAHA	3	0.99077	0.99926	21183	0	0.025052	0.972765	468	3	5.8702
TBL1X	3	0.87278	0.996322	18638	0	0.09519	0.994322	1766	2	5.8702
C4orf19	2	0.96768	0.997574	20721	0	0.0069845	0.970617	170	2	5.8696
STAU2	3	0.96443	0.997574	20646	0	0.030252	0.972765	557	2	5.8621
ZNF607	3	0.099991	0.976462	1835	1	0.11397	0.994322	2146	2	5.8621
hsa-mir-4275	3	0.55157	0.996322	10813	1	0.12762	0.994322	2426	2	5.862
CRHR1	3	0.19076	0.984333	3656	1	0.13848	0.994322	2663	2	5.8539
KRTAP4-6	3	0.74836	0.996322	15929	1	0.13076	0.994322	2495	2	5.8539
THAP1	3	0.49012	0.996322	9487	1	0.13848	0.994322	2662	2	5.8539
GATA6	3	0.98349	0.998901	21040	0	0.043293	0.972765	808	3	5.8456
hsa-mir-2054	1	0.83403	0.996322	17824	0	0.16609	0.994322	5099	1	5.8373
SELT	3	0.82343	0.996322	17607	0	0.13917	0.994322	2678	2	5.8206
OR8D1	3	0.87501	0.996322	18676	0	0.13936	0.994322	2682	2	5.8121
OR11A1	3	0.53599	0.996322	10400	1	0.13955	0.994322	2684	2	5.8036
AMZ1	3	0.32249	0.996322	6475	1	0.13973	0.994322	2690	2	5.7951
CCDC130	2	0.97147	0.998121	20793	0	0.052493	0.990182	1303	2	5.7951
hsa-mir-4273	1	0.83332	0.996322	17814	0	0.16678	0.994322	5124	1	5.7951
TAF8	3	0.79655	0.996322	17038	1	0.13973	0.994322	2689	2	5.7951
hsa-mir-611	2	0.97044	0.998121	20774	0	0.054349	0.990448	1338	2	5.7877
TREM2	3	0.66357	0.996322	13831	1	0.14	0.994322	2693	2	5.7865
TRIB2	3	0.61597	0.996322	12637	1	0.14	0.994322	2694	2	5.7865
CHD1L	3	0.65249	0.996322	13575	1	0.026072	0.972765	480	2	5.7823
PKDREJ	3	0.66825	0.996322	13946	1	0.14029	0.994322	2697	2	5.7778
RANBP9	1	0.8328	0.996322	17807	0	0.16728	0.994322	5135	1	5.7778
SIN3B	3	0.77788	0.996322	16601	1	0.14029	0.994322	2698	2	5.7778
HEATR6	2	0.96837	0.997586	20742	0	0.058015	0.994322	1408	2	5.7658
ASZ1	3	0.48678	0.996322	9453	1	0.044994	0.972765	847	2	5.7515
WNT9B	3	0.67719	0.996322	14141	1	0.14066	0.994322	2710	2	5.7515
KRTAP4-3	3	0.65723	0.996322	13676	1	0.14084	0.994322	2712	2	5.7427
CERCAM	3	0.11679	0.976462	2155	1	0.14123	0.994322	2716	2	5.7158
FAM134B	1	0.83182	0.996322	17789	0	0.16828	0.994322	5170	1	5.7067
RBM43	3	0.80602	0.996322	17243	1	0.14146	0.994322	2726	2	5.7067
hsa-mir-579	3	0.99508	0.999463	21272	0	0.013854	0.972765	253	3	5.6975
LAPTM5	3	0.41834	0.996322	8207	1	0.1255	0.994322	2383	2	5.6834
SGSM1	2	0.97035	0.998121	20771	0	0.0545	0.990448	1343	2	5.681
KIAA1191	3	0.93992	0.996692	20152	0	0.14201	0.994322	2735	2	5.6791
SOX8	3	0.60059	0.996322	12198	1	0.12881	0.994322	2456	2	5.6673
hsa-mir-181b-2	4	0.99739	0.999632	21319	0	0.0093597	0.970617	129	4	5.6541
FABP6	3	0.91746	0.996322	19650	0	0.14296	0.994322	2761	2	5.6318
CHI3L1	3	0.87684	0.996322	18727	0	0.0057494	0.970617	102	2	5.6028
C9orf40	2	0.97061	0.998121	20782	0	0.054036	0.990448	1330	2	5.5982
KLHL23	2	0.97004	0.998121	20764	0	0.029522	0.972765	776	2	5.5965
hsa-mir-8052	3	0.54113	0.996322	10542	1	0.14354	0.994322	2779	2	5.5929
MGAT1	2	0.97015	0.998121	20768	0	0.054844	0.992685	1347	2	5.5898
N4BP2	3	0.69624	0.996322	14635	1	0.042273	0.972765	789	2	5.583
PHF15	2	0.96052	0.997574	20545	0	0.013694	0.972353	364	2	5.5802
ZC3H6	3	0.44808	0.996322	8717	1	0.14387	0.994322	2782	2	5.5731
C9orf91	2	0.96562	0.997574	20677	0	0.021171	0.972765	543	2	5.5648
FAHD2B	3	0.9931	0.999457	21229	0	0.019077	0.972765	356	3	5.563
SLC25A32	3	0.88531	0.996322	18926	0	0.14453	0.994322	2797	2	5.5325
hsa-mir-744	4	0.88995	0.996322	19049	0	0.053377	0.990448	904	3	5.5265
APOM	3	0.99304	0.999457	21227	0	0.019217	0.972765	359	3	5.5222
ATP13A3	3	0.64878	0.996322	13483	1	0.14528	0.994322	2816	2	5.4908
CLN8	1	0.82858	0.996322	17722	0	0.1714	0.994322	5236	1	5.4908
DSCR3	3	0.5695	0.996322	11315	1	0.14528	0.994322	2815	2	5.4908
RAB30	3	0.62988	0.996322	13011	1	0.14528	0.994322	2814	2	5.4908
OR10H5	2	0.95346	0.997574	20421	0	0.013523	0.972353	360	2	5.4897
CUTC	3	0.99448	0.999457	21262	0	0.012786	0.970617	234	3	5.4694
ZNF33A	3	0.98846	0.99926	21133	0	0.018029	0.972765	331	3	5.4617
NNT	3	0.80864	0.996322	17296	0	0.044182	0.972765	829	2	5.4586
TULP2	3	0.77051	0.996322	16429	1	0.14588	0.994322	2834	2	5.4478
IL31RA	2	0.96527	0.997574	20668	0	0.063397	0.994322	1501	2	5.4292
MRI1	3	0.51119	0.996322	9886	1	0.13884	0.994322	2670	2	5.3952
NUAK1	2	0.97037	0.998121	20772	0	0.054477	0.990448	1342	2	5.3896
SPAG1	2	0.96971	0.998121	20757	0	0.055648	0.994322	1365	2	5.3854
ANKRD65	3	0.15082	0.982693	2821	1	0.1468	0.994322	2848	2	5.3808
IRF2BP1	2	0.95381	0.997574	20426	0	0.021713	0.972765	566	2	5.3742
CNDP2	3	0.91106	0.996322	19500	0	0.13926	0.994322	2680	2	5.3702
ZNF648	3	0.98822	0.99926	21129	0	0.031682	0.972765	591	3	5.3578
EIF5B	3	0.56234	0.996322	11089	1	0.14747	0.994322	2861	2	5.3461
ATXN2L	2	0.93262	0.996322	20000	0	0.0011274	0.956958	29	2	5.3459
SLC4A3	2	0.97125	0.998121	20791	0	0.05286	0.990448	1308	2	5.3266
SPPL2C	3	0.8107	0.996322	17335	0	0.14811	0.994322	2875	2	5.3225
IBTK	1	0.82612	0.996322	17667	0	0.17395	0.994322	5308	1	5.3106
RPS6KA6	3	0.74481	0.996322	15826	1	0.14829	0.994322	2879	2	5.3106
hsa-mir-634	2	0.95251	0.997574	20396	0	0.033955	0.972765	887	2	5.2791
SIK2	3	0.57384	0.996322	11458	1	0.14916	0.994322	2902	2	5.2741
TRAPPC2	3	0.60655	0.996322	12384	1	0.13928	0.994322	2681	2	5.2561
RELL2	2	0.97223	0.998121	20808	0	0.051133	0.988529	1276	2	5.2534
ITLN2	2	0.96515	0.997574	20664	0	0.015258	0.972765	399	2	5.2517
GTF2H3	2	0.96506	0.997574	20662	0	0.063769	0.994322	1509	2	5.2508
SLC25A43	3	0.94656	0.997216	20283	0	0.089766	0.994322	1648	2	5.2493
FRRS1	2	0.95012	0.997574	20349	0	0.032575	0.972765	860	2	5.2447
BMS1	2	0.9584	0.997574	20513	0	0.029796	0.972765	780	2	5.2444
MYT1	2	0.9663	0.997574	20694	0	0.061597	0.994322	1478	2	5.2355
ALG3	3	0.62149	0.996322	12777	1	0.13281	0.994322	2541	2	5.2238
MCM3	2	0.95303	0.997574	20411	0	0.084262	0.994322	1881	2	5.2203
OR5AC2	2	0.96293	0.997574	20604	0	0.067515	0.994322	1573	2	5.2009
PHGR1	3	0.70788	0.996322	14909	1	0.15122	0.994322	2946	2	5.1984
C6orf99	2	0.96816	0.997574	20736	0	0.058361	0.994322	1415	2	5.1946
RBAK-LOC389458	2	0.94685	0.997216	20293	0	0.0229	0.972765	597	2	5.1734
CRYBB3	2	0.92257	0.996322	19780	0	0.0032945	0.956958	90	2	5.1482
MRPL34	2	0.95432	0.997574	20434	0	0.030196	0.972765	791	2	5.1368
TMEM35	2	0.91452	0.996322	19585	0	0.0009907	0.956958	21	2	5.1265
C2orf88	2	0.95605	0.997574	20462	0	0.031102	0.972765	816	2	5.1126
SLC12A4	3	0.45879	0.996322	8919	1	0.13398	0.994322	2565	2	5.0938
EN2	2	0.89027	0.996322	19059	0	0.0043401	0.956958	112	1	5.0861
CDK5RAP1	2	0.95674	0.997574	20476	0	0.07807	0.994322	1774	2	5.0791
GJB7	2	0.95815	0.997574	20506	0	0.066002	0.994322	1553	2	5.0678
SCNN1B	3	0.98449	0.999165	21058	0	0.040888	0.972765	770	3	5.0499
CENPC1	2	0.96563	0.997574	20678	0	0.062798	0.994322	1497	2	5.0396
SLC6A8	2	0.94845	0.997574	20317	0	0.033698	0.972765	878	2	5.0365
RPL3L	2	0.97063	0.998121	20783	0	0.053994	0.990448	1325	2	5.0032
ACCSL	2	0.90695	0.996322	19400	0	0.15896	0.994322	3304	2	5.0014
PDYN	2	0.96187	0.997574	20575	0	0.069363	0.994322	1607	2	4.9931
TMEM150B	3	0.70804	0.996322	14917	1	0.15809	0.994322	3133	2	4.9744
LTV1	2	0.88292	0.996322	18876	0	0.0076516	0.970617	190	1	4.9666
hsa-mir-196a-2	4	0.99375	0.999457	21245	0	0.0076984	0.970617	107	4	4.9577
SLC39A14	2	0.96283	0.997574	20602	0	0.067687	0.994322	1576	2	4.9574
hsa-mir-1323	4	0.67824	0.996322	12436	1	0.019673	0.972765	282	3	4.9511
SCN7A	2	0.93855	0.996692	20124	0	0.027057	0.972765	709	2	4.9409
TMEM74	2	0.9352	0.996362	20059	0	0.011165	0.970617	288	2	4.9402
MRE11A	2	0.93937	0.996692	20136	0	0.10677	0.994322	2294	2	4.9192
CHRNA9	2	0.96473	0.997574	20651	0	0.064365	0.994322	1519	2	4.9174
BUB3	2	0.86902	0.996322	18564	0	0.0080199	0.970617	199	1	4.912
NDUFAF5	2	0.88609	0.996322	18947	0	0.013016	0.970617	338	1	4.9107
ME2	2	0.96349	0.997574	20616	0	0.056725	0.994322	1386	2	4.9099
GDF3	2	0.90286	0.996322	19302	0	0.033264	0.972765	873	2	4.9062
ZNF839	2	0.96393	0.997574	20629	0	0.065776	0.994322	1547	2	4.9008
RAB33B	2	0.94407	0.997015	20235	0	0.044532	0.972765	1122	2	4.9003
BACE1	2	0.94584	0.997216	20270	0	0.096209	0.994322	2089	2	4.884
BLM	2	0.93679	0.996567	20088	0	0.051049	0.988529	1271	2	4.8755
SDF2L1	2	0.91748	0.996322	19651	0	0.060089	0.994322	1452	2	4.8662
CDC37	2	0.94986	0.997574	20346	0	0.02344	0.972765	611	2	4.866
CAMLG	2	0.93276	0.996322	20006	0	0.056941	0.994322	1390	2	4.8413
IFNA8	2	0.96991	0.998121	20763	0	0.055282	0.994322	1357	2	4.8388
CA13	2	0.95798	0.997574	20500	0	0.075949	0.994322	1742	2	4.8355
ZNF570	2	0.90784	0.996322	19421	0	0.022083	0.972765	576	2	4.8275
RASAL3	2	0.89508	0.996322	19148	0	0.028974	0.972765	767	1	4.8237
TTC38	2	0.90643	0.996322	19387	0	0.028517	0.972765	754	2	4.8107
SEMA4D	2	0.95313	0.997574	20414	0	0.084092	0.994322	1878	2	4.8033
IFIT3	2	0.96058	0.997574	20546	0	0.071563	0.994322	1658	2	4.8029
TPGS1	2	0.93228	0.996322	19990	0	0.11721	0.994322	2474	2	4.8025
hsa-let-7i	4	0.81639	0.996322	17045	1	0.040373	0.972765	638	3	4.7983
ASCL4	2	0.92777	0.996322	19896	0	0.024451	0.972765	636	2	4.7963
DDX23	2	0.96298	0.997574	20606	0	0.067435	0.994322	1571	2	4.7946
DNM3	2	0.84879	0.996322	18138	0	0.0054311	0.970617	140	1	4.7934
GTF2IRD2	2	0.9531	0.997574	20412	0	0.084159	0.994322	1880	2	4.7826
RBMY1F	2	0.88266	0.996322	18867	0	0.25437	0.994322	6241	1	4.7786
ZNF805	2	0.9275	0.996322	19885	0	0.032182	0.972765	848	2	4.77
GABRD	2	0.93407	0.996322	20038	0	0.04584	0.978399	1151	2	4.7691
IMP3	2	0.94949	0.997574	20339	0	0.090261	0.994322	1990	2	4.7462
SPATA31C1	2	0.96624	0.997574	20692	0	0.061728	0.994322	1481	2	4.7442
EMC2	2	0.93708	0.996567	20096	0	0.079399	0.994322	1804	2	4.744
ZNF491	2	0.96808	0.997574	20732	0	0.058515	0.994322	1427	2	4.7437
hsa-mir-567	4	0.91685	0.996322	19636	0	0.034124	0.972765	502	3	4.7338
RAB32	2	0.96621	0.997574	20691	0	0.061783	0.994322	1482	2	4.7337
RICTOR	2	0.87837	0.996322	18760	0	0.032343	0.972765	850	1	4.7286
MEX3B	2	0.90304	0.996322	19307	0	0.040867	0.972765	1041	2	4.7235
BIK	2	0.88664	0.996322	18961	0	0.047449	0.981813	1187	1	4.7191
HMGN2	2	0.93463	0.996342	20048	0	0.086895	0.994322	1935	2	4.7177
RAB40C	2	0.91052	0.996322	19484	0	0.022219	0.972765	580	2	4.7139
ZNF705D	2	0.93312	0.996322	20016	0	0.070698	0.994322	1636	2	4.7126
ZNF511	2	0.91023	0.996322	19475	0	0.060587	0.994322	1460	2	4.7107
RSAD1	3	0.98153	0.998829	21002	0	0.048044	0.986746	893	3	4.7092
RPA2	2	0.95209	0.997574	20387	0	0.085825	0.994322	1912	2	4.7067
APOBEC4	2	0.93616	0.996379	20079	0	0.11095	0.994322	2354	2	4.6953
DMPK	2	0.94301	0.996787	20219	0	0.1008	0.994322	2171	2	4.6868
MMP24	2	0.95683	0.997574	20478	0	0.077933	0.994322	1772	2	4.6868
MAGEL2	2	0.96123	0.997574	20562	0	0.070444	0.994322	1630	2	4.681
FAT1	2	0.95197	0.997574	20382	0	0.086038	0.994322	1918	2	4.6809
VGF	2	0.94161	0.996752	20187	0	0.10313	0.994322	2225	2	4.6738
CNIH1	2	0.95069	0.997574	20356	0	0.088215	0.994322	1953	2	4.6723
FAM47E	2	0.96759	0.997574	20720	0	0.05936	0.994322	1437	2	4.6683
UBQLN4	1	0.82406	0.996322	17616	0	0.17597	0.994322	5355	1	4.6603
ERO1LB	2	0.9095	0.996322	19461	0	0.034389	0.972765	894	2	4.6596
MUC21	2	0.94252	0.996752	20210	0	0.10163	0.994322	2189	2	4.6592
NRARP	2	0.93755	0.996596	20106	0	0.10493	0.994322	2250	2	4.6582
EDDM3A	2	0.79487	0.996322	16997	0	0.0033701	0.956958	92	1	4.6568
SAA1	2	0.78094	0.996322	16703	0	0.0023157	0.956958	61	1	4.6505
ZBED2	2	0.90795	0.996322	19424	0	0.093475	0.994322	2040	2	4.6458
F2RL1	2	0.92612	0.996322	19851	0	0.085577	0.994322	1908	2	4.6426
hsa-mir-4526	2	0.79182	0.996322	16944	0	0.0027687	0.956958	76	1	4.6402
DDX49	2	0.9308	0.996322	19962	0	0.12075	0.994322	2538	2	4.6341
HBM	2	0.85694	0.996322	18316	0	0.018536	0.972765	487	1	4.6333
NFATC1	2	0.84756	0.996322	18108	0	0.0071503	0.970617	178	1	4.6288
SPDYE4	2	0.92022	0.996322	19722	0	0.069486	0.994322	1610	2	4.6274
TTLL4	2	0.92736	0.996322	19880	0	0.044879	0.972765	1132	2	4.6269
hsa-mir-421	4	0.97992	0.998361	20977	0	0.057442	0.994322	982	3	4.6246
YIPF5	2	0.92594	0.996322	19850	0	0.084488	0.994322	1891	2	4.6219
ADAMTS13	2	0.96778	0.997574	20724	0	0.059037	0.994322	1434	2	4.6149
BIRC2	2	0.96824	0.997574	20740	0	0.05824	0.994322	1410	2	4.6108
KRT27	2	0.93134	0.996322	19973	0	0.068812	0.994322	1595	2	4.6088
FSD1	2	0.93956	0.996692	20140	0	0.10647	0.994322	2285	2	4.5996
hsa-mir-4501	2	0.96277	0.997574	20598	0	0.067798	0.994322	1577	2	4.5964
MED30	2	0.96461	0.997574	20649	0	0.064595	0.994322	1525	2	4.5964
CDX2	2	0.96175	0.997574	20573	0	0.069547	0.994322	1611	2	4.5947
MICAL2	2	0.95796	0.997574	20499	0	0.075992	0.994322	1743	2	4.587
SPRR2D	2	0.93025	0.996322	19947	0	0.12165	0.994322	2550	2	4.5723
ABCC8	2	0.95888	0.997574	20520	0	0.074445	0.994322	1716	2	4.5656
ZNF45	2	0.80794	0.996322	17284	0	0.011005	0.970617	283	1	4.5655
hsa-mir-6128	2	0.8042	0.996322	17208	0	0.0084493	0.970617	215	1	4.5644
ERO1L	2	0.92105	0.996322	19740	0	0.089956	0.994322	1982	2	4.5614
DUSP7	2	0.92431	0.996322	19820	0	0.10206	0.994322	2200	2	4.5606
BGLAP	2	0.90709	0.996322	19404	0	0.052996	0.990448	1313	2	4.56
UBXN11	2	0.91809	0.996322	19662	0	0.1413	0.994322	2928	2	4.5591
NQO2	2	0.83172	0.996322	17794	0	0.012371	0.970617	323	1	4.5584
C17orf58	2	0.95758	0.997574	20491	0	0.076597	0.994322	1757	2	4.5566
GRK4	2	0.93359	0.996322	20027	0	0.11614	0.994322	2452	2	4.5543
hsa-mir-6807	2	0.74007	0.996322	15885	0	0.003219	0.956958	87	1	4.552
GPATCH2L	2	0.84966	0.996322	18156	0	0.015925	0.972765	421	1	4.5514
KEAP1	2	0.97247	0.998121	20816	0	0.050746	0.988529	1262	2	4.5472
S1PR5	2	0.95514	0.997574	20448	0	0.080805	0.994322	1823	2	4.5415
DDR2	2	0.86602	0.996322	18502	0	0.021849	0.972765	569	1	4.5383
DCXR	2	0.91178	0.996322	19514	0	0.086422	0.994322	1924	2	4.5369
SYNDIG1	2	0.93376	0.996322	20030	0	0.11588	0.994322	2442	2	4.535
PAPOLB	2	0.96211	0.997574	20584	0	0.068916	0.994322	1598	2	4.5289
TTC26	2	0.9539	0.997574	20429	0	0.082806	0.994322	1864	2	4.5257
FASLG	2	0.94075	0.996752	20171	0	0.1045	0.994322	2243	2	4.5255
DTWD1	2	0.92549	0.996322	19841	0	0.12926	0.994322	2691	2	4.5177
ARSH	2	0.96544	0.997574	20673	0	0.063126	0.994322	1499	2	4.5171
FABP12	2	0.96505	0.997574	20660	0	0.063784	0.994322	1510	2	4.5139
hsa-mir-6862-2	2	0.89622	0.996322	19169	0	0.13653	0.994322	2838	1	4.5132
DEFB104A	2	0.94678	0.997216	20291	0	0.09466	0.994322	2059	2	4.5062
TAS2R10	2	0.95485	0.997574	20443	0	0.081269	0.994322	1839	2	4.5021
UBL4B	2	0.96387	0.997574	20626	0	0.065873	0.994322	1550	2	4.5
MROH9	2	0.85951	0.996322	18360	0	0.046682	0.981813	1171	1	4.497
SMIM9	2	0.94355	0.996988	20228	0	0.099902	0.994322	2156	2	4.494
SLC26A10	2	0.90518	0.996322	19352	0	0.090682	0.994322	1996	2	4.493
ST8SIA5	2	0.94145	0.996752	20183	0	0.10336	0.994322	2227	2	4.4917
BLID	2	0.94918	0.997574	20333	0	0.090768	0.994322	1997	2	4.4901
LAMP1	2	0.88706	0.996322	18973	0	0.10436	0.994322	2240	1	4.4875
AP3S1	2	0.9112	0.996322	19503	0	0.099182	0.994322	2147	2	4.4852
CARD16	2	0.96453	0.997574	20645	0	0.064727	0.994322	1529	2	4.4844
hsa-mir-2681	2	0.96005	0.997574	20541	0	0.072479	0.994322	1674	2	4.4823
RNF126	2	0.89618	0.996322	19166	0	0.098365	0.994322	2137	1	4.4818
STAMBPL1	2	0.94927	0.997574	20336	0	0.090606	0.994322	1994	2	4.4778
KCNK4	2	0.85693	0.996322	18315	0	0.045574	0.97498	1146	1	4.4754
ESRRA	2	0.95849	0.997574	20514	0	0.075097	0.994322	1725	2	4.4743
CTAG1A	2	0.90239	0.996322	19295	0	0.051049	0.988529	1272	2	4.4734
USF1	2	0.79989	0.996322	17123	0	0.017309	0.972765	453	1	4.4727
PCDHGA8	2	0.9358	0.996379	20073	0	0.11263	0.994322	2382	2	4.4664
CASP3	2	0.95285	0.997574	20404	0	0.084628	0.994322	1897	2	4.4651
GIMAP2	2	0.95974	0.997574	20536	0	0.07299	0.994322	1679	2	4.4651
GAS1	2	0.90595	0.996322	19373	0	0.16053	0.994322	3354	2	4.4626
RTN4RL1	2	0.91946	0.996322	19706	0	0.13905	0.994322	2881	2	4.4557
NHLRC3	2	0.96078	0.997574	20551	0	0.071186	0.994322	1650	2	4.4554
C2orf91	2	0.89297	0.996322	19104	0	0.061715	0.994322	1479	1	4.4513
hsa-mir-378d-2	3	0.90028	0.996322	19254	0	0.1855	0.994322	3710	2	4.4508
ATRX	2	0.82364	0.996322	17618	0	0.049238	0.988529	1235	1	4.4465
GYS1	2	0.95558	0.997574	20456	0	0.080065	0.994322	1813	2	4.4453
SPATC1	2	0.91117	0.996322	19502	0	0.13469	0.994322	2800	2	4.4417
hsa-mir-6755	2	0.89922	0.996322	19232	0	0.16202	0.994322	3379	1	4.436
LAT	2	0.96074	0.997574	20549	0	0.071248	0.994322	1651	2	4.4352
AGA	2	0.91091	0.996322	19490	0	0.076927	0.994322	1759	2	4.433
SKA2	2	0.84058	0.996322	17972	0	0.040081	0.972765	1023	1	4.4326
hsa-mir-484	2	0.84573	0.996322	18081	0	0.044048	0.972765	1107	1	4.4307
PMS2	2	0.95383	0.997574	20427	0	0.08292	0.994322	1866	2	4.4264
hsa-mir-643	2	0.9597	0.997574	20534	0	0.073073	0.994322	1687	2	4.4256
FAM213A	2	0.95956	0.997574	20532	0	0.073329	0.994322	1692	2	4.4242
CCNE1	2	0.96205	0.997574	20582	0	0.069039	0.994322	1604	2	4.4221
hsa-mir-133a-2	2	0.89904	0.996322	19227	0	0.10745	0.994322	2304	1	4.4188
OR7G1	2	0.81754	0.996322	17483	0	0.02573	0.972765	669	1	4.4179
FUCA2	2	0.96184	0.997574	20574	0	0.069403	0.994322	1609	2	4.4153
ARHGAP31	2	0.90537	0.996322	19358	0	0.14136	0.994322	2929	2	4.4143
P2RY12	2	0.96456	0.997574	20647	0	0.064662	0.994322	1527	2	4.414
KIAA1549	2	0.95646	0.997574	20469	0	0.078571	0.994322	1786	2	4.4125
MYH6	2	0.96267	0.997574	20595	0	0.067994	0.994322	1585	2	4.4097
PRR3	2	0.95299	0.997574	20407	0	0.084348	0.994322	1886	2	4.4056
CCDC36	2	0.8296	0.996322	17757	0	0.021528	0.972765	560	1	4.4021
CCL3	2	0.95021	0.997574	20350	0	0.089096	0.994322	1969	2	4.4003
SCRN3	2	0.81293	0.996322	17383	0	0.029522	0.972765	777	1	4.3993
DAK	2	0.9164	0.996322	19621	0	0.12787	0.994322	2664	2	4.3977
HLX	1	0.85707	0.996322	18314	0	0.14306	0.994322	4559	1	4.3967
COL5A3	2	0.90081	0.996322	19270	0	0.16861	0.994322	3507	2	4.3921
EFCAB12	2	0.96772	0.997574	20722	0	0.059127	0.994322	1435	2	4.3914
OSBPL6	2	0.81071	0.996322	17337	0	0.027621	0.972765	729	1	4.3905
MST1L	2	0.94269	0.996752	20214	0	0.10134	0.994322	2180	2	4.3902
SUMF2	2	0.92189	0.996322	19763	0	0.13508	0.994322	2810	2	4.3897
hsa-mir-628	2	0.95806	0.997574	20504	0	0.075825	0.994322	1736	2	4.3888
CENPT	2	0.93965	0.996692	20142	0	0.1063	0.994322	2282	2	4.3883
DNAAF3	2	0.76399	0.996322	16349	0	0.0070841	0.970617	173	1	4.3882
TRIM2	2	0.86199	0.996322	18411	0	0.065715	0.994322	1542	1	4.3845
SPRYD3	2	0.86959	0.996322	18577	0	0.065123	0.994322	1536	1	4.3824
hsa-mir-4763	3	0.79838	0.996322	17085	1	0.15161	0.994322	2959	2	4.3809
DUSP2	2	0.94833	0.997574	20314	0	0.092133	0.994322	2021	2	4.3808
ETV6	2	0.96625	0.997574	20693	0	0.061718	0.994322	1480	2	4.3772
KRTAP4-8	2	0.95479	0.997574	20441	0	0.081345	0.994322	1840	2	4.3763
KLHDC1	2	0.88651	0.996322	18958	0	0.16327	0.994322	3410	1	4.3737
hsa-mir-6858	4	0.085012	0.976462	1293	1	0.097397	0.994322	1659	3	4.373
HSPB8	2	0.91028	0.996322	19479	0	0.11392	0.994322	2401	2	4.3723
ZNF816	3	0.82572	0.996322	17668	0	0.13243	0.994322	2534	2	4.371
VIL1	2	0.90878	0.996322	19441	0	0.1561	0.994322	3251	2	4.3694
OR1Q1	2	0.85057	0.996322	18179	0	0.046682	0.981813	1173	1	4.3672
ZDHHC5	3	0.28281	0.994862	5732	1	0.10847	0.994322	2028	2	4.3611
LOC100506422	2	0.96658	0.997574	20701	0	0.061142	0.994322	1468	2	4.36
C11orf94	2	0.73815	0.996322	15836	0	0.0073898	0.970617	183	1	4.3596
SCAMP4	2	0.91139	0.996322	19505	0	0.09531	0.994322	2071	2	4.3586
ADAT3	2	0.94639	0.997216	20281	0	0.095276	0.994322	2070	2	4.3579
hsa-mir-3181	4	0.93542	0.996379	20067	0	0.10827	0.994322	1822	3	4.3554
hsa-mir-7704	2	0.88479	0.996322	18921	0	0.11506	0.994322	2422	1	4.3543
PDE4C	2	0.7972	0.996322	17066	0	0.030196	0.972765	792	1	4.3519
OXSR1	2	0.92933	0.996322	19931	0	0.12052	0.994322	2533	2	4.3515
SPCS2	2	0.96087	0.997574	20553	0	0.071053	0.994322	1649	2	4.3502
UBE4B	2	0.88813	0.996322	19002	0	0.17093	0.994322	3575	1	4.3497
PLAC4	2	0.76543	0.996322	16385	0	0.018091	0.972765	473	1	4.3475
TMEM254	2	0.95208	0.997574	20386	0	0.085846	0.994322	1913	2	4.3449
PLA2G4F	2	0.82564	0.996322	17669	0	0.031972	0.972765	844	1	4.342
PIGV	2	0.94968	0.997574	20343	0	0.089946	0.994322	1979	2	4.337
CHD2	2	0.95639	0.997574	20468	0	0.078677	0.994322	1788	2	4.334
ALS2CL	2	0.95351	0.997574	20423	0	0.083449	0.994322	1870	2	4.3339
CLN3	3	0.69818	0.996322	14680	1	0.14267	0.994322	2748	2	4.3319
CCT8L2	2	0.87929	0.996322	18782	0	0.16289	0.994322	3404	1	4.3296
ERLIN1	2	0.86024	0.996322	18375	0	0.057327	0.994322	1398	1	4.3238
C3AR1	2	0.75386	0.996322	16148	0	0.014934	0.972765	393	1	4.3236
PNPO	2	0.95445	0.997574	20436	0	0.081905	0.994322	1853	2	4.3228
TMEM86B	2	0.93454	0.996342	20046	0	0.11462	0.994322	2420	2	4.3227
hsa-mir-4450	4	0.74835	0.996322	14511	1	0.05899	0.994322	1017	3	4.3212
C12orf29	2	0.86584	0.996322	18495	0	0.091898	0.994322	2019	1	4.3179
HIST1H3B	2	0.91896	0.996322	19692	0	0.13987	0.994322	2904	2	4.3162
RLIM	2	0.9679	0.997574	20729	0	0.058795	0.994322	1430	2	4.3139
LILRB3	2	0.96497	0.997574	20655	0	0.063922	0.994322	1515	2	4.3138
SNN	2	0.94603	0.997216	20274	0	0.095886	0.994322	2086	2	4.2984
SKIL	2	0.89128	0.996322	19073	0	0.13586	0.994322	2826	1	4.2972
HDHD1	2	0.87738	0.996322	18738	0	0.15302	0.994322	3181	1	4.2964
NFATC4	2	0.94747	0.997403	20302	0	0.093523	0.994322	2043	2	4.2945
hsa-mir-3145	2	0.8065	0.996322	17257	0	0.042426	0.972765	1068	1	4.2942
BTG3	2	0.91811	0.996322	19663	0	0.14127	0.994322	2927	2	4.2919
MEDAG	2	0.94513	0.997055	20259	0	0.097409	0.994322	2114	2	4.2892
SOHLH2	3	0.9326	0.996322	19998	0	0.1337	0.994322	2554	2	4.2883
SCNN1G	2	0.88617	0.996322	18951	0	0.15587	0.994322	3247	1	4.288
LRRN1	2	0.75273	0.996322	16127	0	0.019172	0.972765	501	1	4.2872
POLM	2	0.86534	0.996322	18482	0	0.092864	0.994322	2029	1	4.2816
FAM206A	2	0.93479	0.996342	20052	0	0.11422	0.994322	2408	2	4.2794
KCTD6	2	0.95776	0.997574	20493	0	0.076305	0.994322	1751	2	4.2785
TTK	2	0.96214	0.997574	20585	0	0.068886	0.994322	1597	2	4.2785
ZNF20	2	0.91579	0.996322	19610	0	0.14493	0.994322	3008	2	4.2739
SPHKAP	2	0.73143	0.996322	15714	0	0.016922	0.972765	445	1	4.2738
CCDC181	2	0.94499	0.997045	20256	0	0.097662	0.994322	2125	2	4.2712
ANPEP	3	0.90584	0.996322	19368	0	0.13882	0.994322	2667	2	4.2682
PRDM2	2	0.83033	0.996322	17768	0	0.063623	0.994322	1507	1	4.2682
CCDC25	2	0.85231	0.996322	18217	0	0.077774	0.994322	1771	1	4.2661
IPPK	2	0.77136	0.996322	16504	0	0.028739	0.972765	757	1	4.266
ZBTB49	3	0.78457	0.996322	16756	1	0.20368	0.994322	4016	2	4.2652
C8orf46	2	0.95673	0.997574	20475	0	0.078096	0.994322	1778	2	4.2643
PFKFB2	2	0.86627	0.996322	18506	0	0.12154	0.994322	2547	1	4.2636
KLHL11	2	0.76918	0.996322	16461	0	0.02775	0.972765	731	1	4.2608
C2orf15	2	0.78121	0.996322	16712	0	0.03558	0.972765	916	1	4.2562
hsa-mir-4742	2	0.72563	0.996322	15597	0	0.012489	0.970617	326	1	4.2555
ZNF385D	2	0.91352	0.996322	19560	0	0.1485	0.994322	3089	2	4.2534
TMEM8C	2	0.9565	0.997574	20471	0	0.078511	0.994322	1785	2	4.2478
SLCO3A1	2	0.9448	0.997045	20250	0	0.097952	0.994322	2128	2	4.2471
HOXB9	2	0.9438	0.997015	20232	0	0.099534	0.994322	2152	2	4.2434
CPLX2	2	0.85449	0.996322	18264	0	0.064703	0.994322	1528	1	4.2416
TTC1	2	0.95432	0.997574	20433	0	0.082114	0.994322	1858	2	4.2416
SLC25A46	2	0.91619	0.996322	19617	0	0.14431	0.994322	2996	2	4.2397
LIN9	2	0.91248	0.996322	19531	0	0.15019	0.994322	3132	2	4.2358
AMFR	2	0.785	0.996322	16794	0	0.050516	0.988529	1260	1	4.2348
P2RY4	2	0.85142	0.996322	18198	0	0.067482	0.994322	1572	1	4.2346
NAA20	2	0.94264	0.996752	20211	0	0.10143	0.994322	2185	2	4.2324
RAB1B	2	0.95077	0.997574	20358	0	0.088069	0.994322	1951	2	4.2305
MYO19	2	0.94151	0.996752	20186	0	0.10327	0.994322	2226	2	4.229
USP34	2	0.91323	0.996322	19553	0	0.14896	0.994322	3095	2	4.2271
TIPRL	2	0.77285	0.996322	16532	0	0.04226	0.972765	1062	1	4.2257
TPPP2	2	0.95167	0.997574	20373	0	0.086565	0.994322	1925	2	4.2243
KIF27	2	0.9549	0.997574	20444	0	0.081194	0.994322	1836	2	4.2242
COX7A2	2	0.7569	0.996322	16215	0	0.02405	0.972765	624	1	4.2224
TAF9B	2	0.94201	0.996752	20197	0	0.10247	0.994322	2207	2	4.2221
PSMC1	2	0.81543	0.996322	17436	0	0.058488	0.994322	1426	1	4.2183
OR10K2	2	0.87369	0.996322	18656	0	0.12327	0.994322	2576	1	4.2181
AQP9	2	0.93386	0.996322	20032	0	0.11571	0.994322	2438	2	4.2164
RAP2A	2	0.91263	0.996322	19535	0	0.14996	0.994322	3121	2	4.2148
MYBPH	2	0.88843	0.996322	19010	0	0.20749	0.994322	4780	1	4.2114
SPATS2L	2	0.87645	0.996322	18719	0	0.094267	0.994322	2054	1	4.211
GDF11	2	0.70039	0.996322	15143	0	0.0098039	0.970617	255	1	4.2106
hsa-mir-6514	4	0.90442	0.996322	19339	0	0.060515	0.994322	1042	3	4.2098
APPL1	2	0.90694	0.996322	19399	0	0.15898	0.994322	3305	2	4.2089
IGIP	2	0.69916	0.996322	15121	0	0.0096659	0.970617	251	1	4.2058
UBAP2L	2	0.96101	0.997574	20556	0	0.070826	0.994322	1638	2	4.1994
CDK13	2	0.77926	0.996322	16675	0	0.052057	0.988529	1295	1	4.1989
OR6X1	2	0.69656	0.996322	15064	0	0.01309	0.970617	341	1	4.1983
USH2A	2	0.92922	0.996322	19927	0	0.12334	0.994322	2577	2	4.1982
C2CD4A	2	0.91931	0.996322	19702	0	0.13932	0.994322	2894	2	4.1981
CFD	2	0.84904	0.996322	18147	0	0.11721	0.994322	2472	1	4.196
NLRP1	2	0.91926	0.996322	19698	0	0.13939	0.994322	2895	2	4.1939
FCRLA	2	0.91228	0.996322	19526	0	0.15054	0.994322	3137	2	4.1903
CLIC1	2	0.94667	0.997216	20288	0	0.094818	0.994322	2061	2	4.1893
DIAPH1	2	0.8448	0.996322	18054	0	0.10293	0.994322	2215	1	4.1863
OAS1	2	0.87625	0.996322	18713	0	0.14855	0.994322	3091	1	4.1852
TRMT5	2	0.9368	0.996567	20089	0	0.11108	0.994322	2359	2	4.177
PRKDC	2	0.78999	0.996322	16903	0	0.06268	0.994322	1496	1	4.1765
TNFRSF21	2	0.9493	0.997574	20337	0	0.090579	0.994322	1993	2	4.1762
C16orf74	2	0.94484	0.997045	20253	0	0.097883	0.994322	2126	2	4.1755
RAB39A	2	0.90927	0.996322	19451	0	0.15532	0.994322	3229	2	4.1653
SHC3	2	0.91877	0.996322	19685	0	0.14016	0.994322	2910	2	4.1653
SFT2D1	2	0.83868	0.996322	17936	0	0.080245	0.994322	1817	1	4.1652
RGPD4	2	0.92508	0.996322	19832	0	0.12989	0.994322	2706	2	4.1646
TAF11	3	0.95144	0.997574	20370	0	0.21333	0.994322	4185	2	4.1626
CCDC17	2	0.91641	0.996322	19622	0	0.14398	0.994322	2985	2	4.1608
CDH17	2	0.8267	0.996322	17693	0	0.088229	0.994322	1957	1	4.1604
C6orf15	2	0.93804	0.996619	20115	0	0.10903	0.994322	2321	2	4.1602
hsa-mir-1471	4	0.95908	0.997574	20529	0	0.023893	0.972765	352	2	4.1602
DAB2	2	0.87445	0.996322	18665	0	0.15783	0.994322	3283	1	4.1601
CAMK4	2	0.90538	0.996322	19359	0	0.16143	0.994322	3368	2	4.1567
GNPNAT1	2	0.91985	0.996322	19716	0	0.13842	0.994322	2871	2	4.1564
SMIM18	2	0.78353	0.996322	16763	0	0.06049	0.994322	1458	1	4.1557
TMEM133	2	0.93716	0.996567	20098	0	0.11051	0.994322	2347	2	4.1548
XRCC6BP1	2	0.90698	0.996322	19401	0	0.15892	0.994322	3303	2	4.1544
ZSCAN23	2	0.76638	0.996322	16411	0	0.054963	0.993632	1352	1	4.152
LCE3D	2	0.9333	0.996322	20021	0	0.11663	0.994322	2457	2	4.1501
NUCKS1	2	0.70903	0.996322	15296	0	0.020364	0.972765	521	1	4.1486
hsa-mir-595	4	0.72024	0.996322	13424	1	0.13954	0.994322	2296	3	4.1438
P4HB	2	0.82127	0.996322	17565	0	0.084488	0.994322	1896	1	4.1397
PSMB1	2	0.90375	0.996322	19326	0	0.16391	0.994322	3418	2	4.1395
RFXAP	2	0.81438	0.996322	17411	0	0.078706	0.994322	1790	1	4.1385
hsa-mir-5191	2	0.87231	0.996322	18624	0	0.14048	0.994322	2917	1	4.1375
GPAT2	2	0.80856	0.996322	17295	0	0.075372	0.994322	1730	1	4.1374
HPS1	2	0.84897	0.996322	18143	0	0.14682	0.994322	3053	1	4.1364
MANSC4	2	0.87517	0.996322	18685	0	0.15974	0.994322	3324	1	4.1353
INHBE	2	0.90394	0.996322	19330	0	0.16362	0.994322	3416	2	4.1346
TMEM159	2	0.83047	0.996322	17773	0	0.10206	0.994322	2202	1	4.1343
CERS3	2	0.92622	0.996322	19856	0	0.12814	0.994322	2672	2	4.1335
NEK10	2	0.90531	0.996322	19355	0	0.16153	0.994322	3369	2	4.1323
GJD4	2	0.93945	0.996692	20138	0	0.10663	0.994322	2289	2	4.1318
AP1S1	2	0.95502	0.997574	20446	0	0.080998	0.994322	1833	2	4.1312
OR8B3	2	0.83671	0.996322	17889	0	0.074685	0.994322	1719	1	4.1305
EPC2	2	0.92415	0.996322	19816	0	0.13142	0.994322	2732	2	4.1297
TMEM108	2	0.8	0.996322	17126	0	0.071838	0.994322	1660	1	4.128
hsa-mir-596	2	0.94966	0.997574	20341	0	0.089967	0.994322	1984	2	4.1272
CCDC134	2	0.93571	0.996379	20069	0	0.11278	0.994322	2387	2	4.1263
LEPREL4	2	0.91988	0.996322	19717	0	0.13838	0.994322	2870	2	4.1262
AQP7	2	0.84462	0.996322	18051	0	0.10293	0.994322	2216	1	4.1261
C12orf56	2	0.92826	0.996322	19899	0	0.12494	0.994322	2606	2	4.1258
LRRC14B	2	0.93745	0.996581	20103	0	0.11006	0.994322	2341	2	4.125
FOXD4L3	2	0.88911	0.996322	19027	0	0.14993	0.994322	3119	1	4.1247
TLR1	2	0.94168	0.996752	20189	0	0.10303	0.994322	2220	2	4.1244
PTPLA	2	0.87195	0.996322	18620	0	0.15649	0.994322	3256	1	4.1238
KLK1	2	0.69048	0.996322	14927	0	0.015583	0.972765	406	1	4.1233
RPL6	2	0.95961	0.997574	20533	0	0.073236	0.994322	1690	2	4.1213
TMEM11	2	0.92853	0.996322	19908	0	0.12447	0.994322	2604	2	4.1209
PRPSAP2	2	0.92116	0.996322	19743	0	0.13628	0.994322	2835	2	4.1194
TUBA1A	2	0.92095	0.996322	19739	0	0.13666	0.994322	2841	2	4.1192
CARD10	2	0.94295	0.996775	20218	0	0.1009	0.994322	2172	2	4.1179
AMOTL2	2	0.87141	0.996322	18611	0	0.13469	0.994322	2799	1	4.1175
TNFSF4	2	0.83218	0.996322	17804	0	0.1241	0.994322	2595	1	4.1175
AP3S2	2	0.93305	0.996322	20014	0	0.11707	0.994322	2466	2	4.117
FBXW10	2	0.94268	0.996752	20213	0	0.10136	0.994322	2181	2	4.1168
TMEM48	2	0.68103	0.996322	14755	0	0.014375	0.972765	383	1	4.1167
ZNF446	2	0.66695	0.996322	14529	0	0.012034	0.970617	313	1	4.1156
ZRANB3	2	0.92335	0.996322	19798	0	0.13276	0.994322	2760	2	4.1115
GCSAM	2	0.92251	0.996322	19779	0	0.13412	0.994322	2788	2	4.1099
SYNE1	2	0.83588	0.996322	17873	0	0.099182	0.994322	2148	1	4.107
CPLX1	2	0.89889	0.996322	19225	0	0.20544	0.994322	4706	1	4.1029
DPPA4	2	0.88211	0.996322	18853	0	0.181	0.994322	3905	1	4.1025
hsa-mir-4664	4	0.4443	0.996322	7942	1	0.059854	0.994322	1033	3	4.1001
SERBP1	2	0.94294	0.996775	20217	0	0.10092	0.994322	2173	2	4.0993
DICER1	2	0.89535	0.996322	19151	0	0.17892	0.994322	3843	1	4.0989
OR5M8	2	0.94416	0.997015	20239	0	0.098937	0.994322	2143	2	4.0981
GPBP1	2	0.89654	0.996322	19176	0	0.2132	0.994322	4945	1	4.0969
hsa-mir-221	4	0.82987	0.996322	17468	1	0.036823	0.972765	562	2	4.0941
C9orf92	2	0.86545	0.996322	18489	0	0.17589	0.994322	3749	1	4.0923
COX7B	2	0.83727	0.996322	17909	0	0.15112	0.994322	3150	1	4.0921
hsa-mir-6890	2	0.9051	0.996322	19350	0	0.16185	0.994322	3372	2	4.0899
POU2F3	2	0.94104	0.996752	20176	0	0.10407	0.994322	2238	2	4.0892
STMN4	2	0.6665	0.996322	14519	1	0.014076	0.972765	374	1	4.0891
VEPH1	2	0.89349	0.996322	19114	0	0.20278	0.994322	4616	1	4.0888
KLHL24	2	0.93125	0.996322	19972	0	0.11999	0.994322	2528	2	4.0876
CNKSR1	2	0.86313	0.996322	18435	0	0.13316	0.994322	2766	1	4.0875
GPR135	2	0.88285	0.996322	18874	0	0.17048	0.994322	3555	1	4.0851
CTDNEP1	2	0.72129	0.996322	15512	0	0.038692	0.972765	992	1	4.0845
hsa-mir-3655	2	0.80769	0.996322	17281	0	0.10923	0.994322	2326	1	4.0842
TAC4	2	0.81616	0.996322	17456	0	0.1132	0.994322	2390	1	4.0834
KCTD9	2	0.93458	0.996342	20047	0	0.11457	0.994322	2419	2	4.0833
NTRK1	2	0.83435	0.996322	17840	0	0.097619	0.994322	2124	1	4.0823
DNAJB9	2	0.89204	0.996322	19084	0	0.18942	0.994322	4179	1	4.0822
SCN3B	2	0.81885	0.996322	17511	0	0.12742	0.994322	2655	1	4.08
TRAPPC6A	2	0.7824	0.996322	16734	0	0.068283	0.994322	1590	1	4.0757
IKBKB	2	0.93633	0.996379	20084	0	0.11183	0.994322	2369	2	4.0756
RUFY2	2	0.9173	0.996322	19645	0	0.14259	0.994322	2958	2	4.0749
MRPS25	2	0.91488	0.996322	19595	0	0.14635	0.994322	3032	2	4.0747
ITGA10	2	0.72614	0.996322	15606	0	0.033698	0.972765	879	1	4.0734
ROBO2	3	0.57599	0.996322	11516	1	0.0046709	0.956958	86	2	4.0714
SLC9A2	2	0.92167	0.996322	19758	0	0.13544	0.994322	2818	2	4.0679
CSNK1A1	2	0.84421	0.996322	18039	0	0.16543	0.994322	3454	1	4.0673
ENG	2	0.91956	0.996322	19710	0	0.13887	0.994322	2880	2	4.0673
CAMTA2	2	0.80523	0.996322	17224	0	0.10745	0.994322	2305	1	4.0653
PLEKHG4B	2	0.9429	0.996775	20216	0	0.10101	0.994322	2174	2	4.0629
ATOH8	2	0.93269	0.996322	20005	0	0.11765	0.994322	2479	2	4.0625
SPPL3	2	0.83549	0.996322	17866	0	0.15921	0.994322	3308	1	4.0611
NFKB2	2	0.91724	0.996322	19642	0	0.14269	0.994322	2960	2	4.0591
SPRR3	2	0.73021	0.996322	15688	0	0.058298	0.994322	1413	1	4.0591
CREBRF	2	0.93894	0.996692	20130	0	0.10752	0.994322	2306	2	4.057
CTDSPL	2	0.94455	0.997045	20245	0	0.098334	0.994322	2136	2	4.0545
FAM63A	3	0.37724	0.996322	7483	1	0.14449	0.994322	2795	2	4.054
DCBLD2	2	0.86713	0.996322	18523	0	0.17093	0.994322	3576	1	4.0531
MEST	2	0.73147	0.996322	15716	0	0.063737	0.994322	1508	1	4.0524
hsa-mir-3127	4	0.98839	0.99926	21136	0	0.083775	0.994322	1455	3	4.052
ESRRB	2	0.64615	0.996322	14207	1	0.013227	0.970617	348	1	4.0492
FAM63B	2	0.91214	0.996322	19525	0	0.15076	0.994322	3139	2	4.0481
MPC1	2	0.84758	0.996322	18109	0	0.17143	0.994322	3591	1	4.0476
RERG	3	0.44963	0.996322	8759	1	0.14106	0.994322	2715	2	4.0474
RNF182	2	0.8401	0.996322	17960	0	0.14225	0.994322	2950	1	4.0473
NFE2L2	2	0.93247	0.996322	19994	0	0.11801	0.994322	2488	2	4.045
hsa-mir-4462	4	0.92345	0.996322	19800	0	0.076856	0.994322	1344	3	4.0438
CASC1	2	0.85896	0.996322	18352	0	0.16646	0.994322	3472	1	4.0426
NKX2-4	2	0.84265	0.996322	18013	0	0.15179	0.994322	3158	1	4.0426
PRKAR2B	2	0.92307	0.996322	19791	0	0.13319	0.994322	2768	2	4.0425
PI4K2B	2	0.89546	0.996322	19154	0	0.21851	0.994322	5114	1	4.0398
PCDHGA5	2	0.84386	0.996322	18034	0	0.15245	0.994322	3168	1	4.0386
NGF	2	0.90352	0.996322	19319	0	0.16431	0.994322	3427	2	4.0373
PGLS	2	0.83976	0.996322	17955	0	0.11721	0.994322	2473	1	4.0357
GPRASP1	2	0.89581	0.996322	19157	0	0.21452	0.994322	4986	1	4.034
GNS	2	0.94944	0.997574	20338	0	0.090332	0.994322	1991	2	4.0307
DOCK10	2	0.80516	0.996322	17222	0	0.11005	0.994322	2340	1	4.0289
hsa-mir-1231	4	0.51238	0.996322	9529	1	0.093895	0.994322	1594	3	4.0262
KHSRP	2	0.87252	0.996322	18630	0	0.1758	0.994322	3741	1	4.0255
SYNE3	2	0.88738	0.996322	18980	0	0.22229	0.994322	5241	1	4.0254
SSSCA1	2	0.80366	0.996322	17197	0	0.097619	0.994322	2123	1	4.0251
LSM5	2	0.88868	0.996322	19016	0	0.18003	0.994322	3877	1	4.0248
PADI3	2	0.90725	0.996322	19411	0	0.1585	0.994322	3295	2	4.0248
ERC2	2	0.80126	0.996322	17154	0	0.10493	0.994322	2252	1	4.0236
FOXP4	2	0.95042	0.997574	20352	0	0.088733	0.994322	1962	2	4.0194
EIF2S2	2	0.88792	0.996322	18996	0	0.21851	0.994322	5118	1	4.0158
GLT6D1	2	0.78019	0.996322	16692	0	0.082935	0.994322	1868	1	4.009
LYPLAL1	3	0.91638	0.996322	19624	0	0.15743	0.994322	3107	2	4.0078
hsa-mir-5089	3	0.53925	0.996322	10493	1	0.13143	0.994322	2516	2	4.0077
FARSA	2	0.92354	0.996322	19804	0	0.13243	0.994322	2747	2	4.0048
REPS1	2	0.92879	0.996322	19917	0	0.12403	0.994322	2594	2	4.002
CPNE5	2	0.77123	0.996322	16497	0	0.085113	0.994322	1905	1	3.9995
IL13RA1	2	0.9316	0.996322	19979	0	0.11943	0.994322	2511	2	3.9995
ZNF549	2	0.7989	0.996322	17107	0	0.14048	0.994322	2915	1	3.9986
OR10AG1	2	0.89677	0.996322	19184	0	0.19629	0.994322	4407	1	3.9984
C8orf47	2	0.935	0.996362	20056	0	0.11387	0.994322	2400	2	3.991
AQP1	2	0.73498	0.996322	15779	0	0.058488	0.994322	1425	1	3.9902
PTX4	2	0.92928	0.996322	19929	0	0.12323	0.994322	2572	2	3.9902
GPR1	2	0.94203	0.996752	20198	0	0.10246	0.994322	2206	2	3.9865
HLTF	2	0.64777	0.996322	14222	1	0.022219	0.972765	582	1	3.9831
hsa-mir-4674	3	0.88289	0.996322	18873	0	0.15658	0.994322	3086	2	3.9825
SIGLEC7	2	0.71469	0.996322	15394	0	0.058818	0.994322	1431	1	3.9807
SRSF8	2	0.55996	0.996322	12727	1	0.00025827	0.880481	7	1	3.978
hsa-mir-874	4	0.72176	0.996322	13495	1	0.10575	0.994322	1787	2	3.9749
SAA4	2	0.93695	0.996567	20093	0	0.11084	0.994322	2351	2	3.9735
GUCA1C	2	0.92092	0.996322	19736	0	0.13671	0.994322	2843	2	3.972
KLF7	2	0.67283	0.996322	14617	0	0.026081	0.972765	684	1	3.9711
LRRC30	2	0.93803	0.996619	20114	0	0.10905	0.994322	2322	2	3.9692
GDI2	2	0.8013	0.996322	17156	0	0.13787	0.994322	2862	1	3.964
CXCR6	2	0.92347	0.996322	19801	0	0.13256	0.994322	2750	2	3.9632
WDR76	2	0.77129	0.996322	16501	0	0.10206	0.994322	2201	1	3.9631
STRBP	2	0.91057	0.996322	19486	0	0.15323	0.994322	3182	2	3.9626
GPANK1	2	0.73996	0.996322	15881	0	0.065123	0.994322	1535	1	3.9625
hsa-mir-4684	4	0.99411	0.999457	21253	0	0.020482	0.972765	297	4	3.9614
FAM89B	2	0.69165	0.996322	14956	0	0.043251	0.972765	1088	1	3.9606
MS4A10	3	0.6285	0.996322	12961	1	0.14864	0.994322	2892	2	3.9604
RCOR3	2	0.61331	0.996322	13626	1	0.0089353	0.970617	233	1	3.9602
TPX2	2	0.76388	0.996322	16345	0	0.093475	0.994322	2041	1	3.9583
FH	2	0.77113	0.996322	16491	0	0.11237	0.994322	2377	1	3.9571
FABP1	2	0.78431	0.996322	16780	0	0.12787	0.994322	2665	1	3.9521
RAD18	2	0.78696	0.996322	16837	0	0.1461	0.994322	3030	1	3.952
HEPACAM	2	0.78068	0.996322	16700	0	0.12502	0.994322	2614	1	3.9514
KLK14	2	0.89824	0.996322	19202	0	0.22483	0.994322	5339	1	3.9497
CD52	2	0.736	0.996322	15794	0	0.089956	0.994322	1981	1	3.9487
EID1	2	0.79511	0.996322	17002	0	0.15921	0.994322	3309	1	3.9478
AKT1S1	2	0.73549	0.996322	15784	0	0.084488	0.994322	1892	1	3.9421
CDKN2AIP	2	0.82136	0.996322	17566	0	0.16979	0.994322	3541	1	3.9394
RPS13	2	0.88161	0.996322	18834	0	0.22909	0.994322	5441	1	3.9383
RGS10	2	0.89991	0.996322	19247	0	0.26134	0.994322	6416	1	3.9381
SLC17A5	2	0.92204	0.996322	19769	0	0.13483	0.994322	2809	2	3.9333
NUDT8	2	0.76587	0.996322	16399	0	0.14682	0.994322	3055	1	3.9329
MALT1	2	0.76107	0.996322	16294	0	0.10923	0.994322	2325	1	3.9324
DCTD	2	0.85334	0.996322	18241	0	0.17664	0.994322	3770	1	3.9321
IFI6	2	0.94503	0.997045	20257	0	0.097588	0.994322	2117	2	3.9255
EFCAB11	2	0.94589	0.997216	20272	0	0.096127	0.994322	2088	2	3.9239
MLC1	2	0.79189	0.996322	16945	0	0.16506	0.994322	3447	1	3.9203
NUP43	2	0.9116	0.996322	19508	0	0.15163	0.994322	3155	2	3.9198
ZNF582	2	0.91898	0.996322	19694	0	0.13984	0.994322	2903	2	3.9195
CDC42BPB	2	0.79958	0.996322	17119	0	0.15467	0.994322	3220	1	3.9186
KCNN1	2	0.8728	0.996322	18639	0	0.17832	0.994322	3819	1	3.9182
PNCK	2	0.90012	0.996322	19253	0	0.2449	0.994322	5916	1	3.917
NOL12	2	0.66519	0.996322	14493	1	0.041915	0.972765	1054	1	3.9166
CXCR5	2	0.91968	0.996322	19712	0	0.13868	0.994322	2877	2	3.9152
TMEM131	2	0.61859	0.996322	13708	1	0.015495	0.972765	404	1	3.9137
hsa-mir-4451	4	0.97953	0.998361	20966	0	0.17612	0.994322	2851	3	3.9128
hsa-mir-548h-3	4	0.87645	0.996322	18709	1	0.19375	0.994322	3166	2	3.9122
ZBTB37	2	0.9124	0.996322	19528	0	0.15032	0.994322	3135	2	3.9112
ZIC1	2	0.64224	0.996322	14107	1	0.021248	0.972765	546	1	3.9108
CNTLN	2	0.91021	0.996322	19474	0	0.1538	0.994322	3198	2	3.9102
ISCA1	2	0.90624	0.996322	19384	0	0.16013	0.994322	3330	2	3.9089
IDNK	2	0.94232	0.996752	20203	0	0.10198	0.994322	2196	2	3.9068
hsa-mir-3125	4	0.76136	0.996322	15017	1	0.10944	0.994322	1847	2	3.9053
C1orf43	2	0.5777	0.996322	13036	1	0.0029239	0.956958	80	1	3.905
NFRKB	2	0.75953	0.996322	16265	0	0.11971	0.994322	2518	1	3.9025
HSPD1	2	0.82366	0.996322	17619	0	0.17696	0.994322	3777	1	3.8989
ISCU	2	0.90502	0.996322	19348	0	0.16199	0.994322	3374	2	3.8989
CALHM3	2	0.96232	0.997574	20589	0	0.068575	0.994322	1593	2	3.8981
GPR171	2	0.7582	0.996322	16237	0	0.11889	0.994322	2501	1	3.898
KRTAP5-2	2	0.88699	0.996322	18972	0	0.24918	0.994322	6073	1	3.8977
SACM1L	2	0.93698	0.996567	20094	0	0.11079	0.994322	2350	2	3.8972
XYLT1	2	0.76816	0.996322	16435	0	0.13948	0.994322	2896	1	3.8956
ZEB1	2	0.88697	0.996322	18968	0	0.19071	0.994322	4224	1	3.8934
FOXH1	2	0.91722	0.996322	19641	0	0.14272	0.994322	2961	2	3.893
OR6K3	2	0.81221	0.996322	17365	0	0.17566	0.994322	3736	1	3.893
TCEB1	2	0.91677	0.996322	19633	0	0.14344	0.994322	2970	2	3.8917
CEP55	2	0.88908	0.996322	19026	0	0.2037	0.994322	4646	1	3.8913
KLHL8	2	0.90603	0.996322	19374	0	0.16044	0.994322	3344	2	3.8912
SLC6A18	2	0.76368	0.996322	16343	0	0.13525	0.994322	2812	1	3.8907
PSEN1	2	0.86541	0.996322	18486	0	0.1928	0.994322	4286	1	3.8894
hsa-mir-365b	2	0.73636	0.996322	15800	0	0.12154	0.994322	2548	1	3.8885
MIPOL1	2	0.77194	0.996322	16511	0	0.15421	0.994322	3211	1	3.8884
TCP10L	2	0.91048	0.996322	19483	0	0.15338	0.994322	3190	2	3.8876
LMNA	3	0.96366	0.997574	20622	0	0.14766	0.994322	2863	2	3.8842
ZNF799	2	0.88019	0.996322	18804	0	0.27392	0.994322	6790	1	3.883
SHISA4	2	0.72447	0.996322	15571	0	0.079399	0.994322	1803	1	3.8812
GREB1	2	0.89615	0.996322	19165	0	0.30237	0.994322	7345	1	3.8778
ABCF2	2	0.9013	0.996322	19281	0	0.16789	0.994322	3489	2	3.8721
CBX6	2	0.7711	0.996322	16490	0	0.15649	0.994322	3255	1	3.8716
LOC100288524	2	0.89851	0.996322	19215	0	0.27185	0.994322	6748	1	3.8682
SPINT3	2	0.86358	0.996322	18442	0	0.2235	0.994322	5280	1	3.8669
ZMYND8	2	0.67436	0.996322	14641	0	0.067266	0.994322	1567	1	3.866
NAB1	2	0.89013	0.996322	19051	0	0.2476	0.994322	6020	1	3.8649
HSPE1-MOB4	2	0.94252	0.996752	20209	0	0.10165	0.994322	2190	2	3.861
PSORS1C1	2	0.89722	0.996322	19195	0	0.19364	0.994322	4321	1	3.8582
C15orf52	2	0.71693	0.996322	15441	0	0.068081	0.994322	1587	1	3.858
IL17RD	2	0.88172	0.996322	18846	0	0.19071	0.994322	4223	1	3.8576
hsa-mir-3974	2	0.9218	0.996322	19759	0	0.13525	0.994322	2811	2	3.8538
SLC35E2B	2	0.92997	0.996322	19941	0	0.12214	0.994322	2555	2	3.8536
C1orf53	2	0.72251	0.996322	15533	0	0.094267	0.994322	2052	1	3.8504
NDUFC2-KCTD14	2	0.65068	0.996322	14256	1	0.040309	0.972765	1030	1	3.8487
TRPM1	2	0.85871	0.996322	18348	0	0.18896	0.994322	4164	1	3.8478
IGBP1	2	0.88435	0.996322	18909	0	0.20278	0.994322	4614	1	3.8475
hsa-mir-3938	4	0.95132	0.997574	20372	0	0.18421	0.994322	2987	3	3.8469
ZNF589	2	0.90299	0.996322	19305	0	0.16513	0.994322	3449	2	3.8457
CRYM	2	0.8803	0.996322	18807	0	0.18391	0.994322	3999	1	3.8456
DRD2	2	0.89981	0.996322	19245	0	0.2132	0.994322	4947	1	3.8445
TPR	2	0.87173	0.996322	18615	0	0.25176	0.994322	6158	1	3.8417
LIPM	2	0.75549	0.996322	16189	0	0.14136	0.994322	2931	1	3.8408
RFWD2	2	0.72317	0.996322	15544	0	0.11889	0.994322	2502	1	3.8407
PPARD	2	0.89857	0.996322	19217	0	0.2197	0.994322	5163	1	3.8405
WNT3	2	0.90759	0.996322	19416	0	0.15798	0.994322	3286	2	3.8405
SOS2	2	0.60286	0.996322	13474	1	0.03174	0.972765	834	1	3.8386
PWWP2A	2	0.9406	0.996748	20168	0	0.10475	0.994322	2247	2	3.8381
RPS20	2	0.89078	0.996322	19064	0	0.22773	0.994322	5415	1	3.8379
CMTM6	2	0.6345	0.996322	13971	1	0.048717	0.98809	1218	1	3.8359
C1orf64	2	0.86952	0.996322	18575	0	0.27498	0.994322	6816	1	3.8358
ABHD1	2	0.74512	0.996322	15981	0	0.15525	0.994322	3227	1	3.8351
SLC6A11	2	0.90783	0.996322	19420	0	0.15759	0.994322	3280	2	3.834
CHRNE	2	0.91346	0.996322	19559	0	0.14861	0.994322	3093	2	3.8327
DAND5	2	0.95532	0.997574	20452	0	0.080491	0.994322	1820	2	3.8312
C14orf28	2	0.75593	0.996322	16195	0	0.14993	0.994322	3117	1	3.8295
UPP1	2	0.87985	0.996322	18795	0	0.24918	0.994322	6076	1	3.8283
KLK11	2	0.66967	0.996322	14568	0	0.058298	0.994322	1414	1	3.8282
UGDH	2	0.89244	0.996322	19093	0	0.27055	0.994322	6703	1	3.8275
SERPINB7	2	0.94408	0.997015	20236	0	0.099073	0.994322	2145	2	3.8272
TRHR	2	0.75194	0.996322	16112	0	0.14437	0.994322	2997	1	3.8247
C9orf156	2	0.87079	0.996322	18597	0	0.19629	0.994322	4406	1	3.8235
STX11	2	0.65868	0.996322	14392	1	0.052822	0.990448	1307	1	3.8225
C17orf112	2	0.88966	0.996322	19040	0	0.20979	0.994322	4849	1	3.8222
POMC	2	0.59244	0.996322	13287	1	0.017449	0.972765	465	1	3.8201
ZMYM2	2	0.73794	0.996322	15830	0	0.16705	0.994322	3479	1	3.8194
KLRG1	2	0.74694	0.996322	16017	0	0.1296	0.994322	2696	1	3.8175
IFIT1	2	0.86248	0.996322	18423	0	0.19901	0.994322	4493	1	3.8163
AGPAT9	2	0.93315	0.996322	20017	0	0.11689	0.994322	2461	2	3.8159
TNS1	2	0.8992	0.996322	19230	0	0.22909	0.994322	5445	1	3.8156
GGACT	2	0.93922	0.996692	20134	0	0.10703	0.994322	2299	2	3.8143
MINK1	2	0.79223	0.996322	16953	0	0.1771	0.994322	3785	1	3.8134
MPHOSPH8	2	0.84553	0.996322	18075	0	0.18461	0.994322	4020	1	3.8132
MYRIP	2	0.82024	0.996322	17547	0	0.18025	0.994322	3881	1	3.8087
EXOC3L4	2	0.89016	0.996322	19052	0	0.30405	0.994322	7381	1	3.8086
SPACA3	2	0.86642	0.996322	18508	0	0.20979	0.994322	4847	1	3.8086
PRUNE2	2	0.92665	0.996322	19864	0	0.12742	0.994322	2657	2	3.808
RRP1B	2	0.6662	0.996322	14515	1	0.042618	0.972765	1070	1	3.8073
ZSCAN32	2	0.85033	0.996322	18171	0	0.18675	0.994322	4092	1	3.803
RPL24	2	0.76905	0.996322	16455	0	0.17207	0.994322	3620	1	3.8024
ACOT11	2	0.84875	0.996322	18135	0	0.18716	0.994322	4105	1	3.8022
hsa-mir-1272	4	0.97166	0.998121	20800	0	0.13585	0.994322	2233	3	3.8022
hsa-mir-106a	4	0.90675	0.996322	19398	0	0.15842	0.994322	2566	2	3.8
AK2	3	0.96598	0.997574	20690	0	0.16371	0.994322	3259	2	3.7999
TTC9B	2	0.89909	0.996322	19228	0	0.22229	0.994322	5242	1	3.7981
PPM1M	2	0.91653	0.996322	19625	0	0.14382	0.994322	2981	2	3.7961
SPATA31C2	2	0.85893	0.996322	18350	0	0.20865	0.994322	4813	1	3.7961
MFF	2	0.92765	0.996322	19891	0	0.12586	0.994322	2626	2	3.7957
TRIM77	2	0.7338	0.996322	15758	0	0.11971	0.994322	2517	1	3.7938
hsa-mir-1827	4	0.732	0.996322	13877	1	0.12643	0.994322	2082	2	3.7921
KLHL15	2	0.83268	0.996322	17812	0	0.18191	0.994322	3928	1	3.7907
SSX5	2	0.6381	0.996322	14036	1	0.047202	0.981813	1181	1	3.7895
CASS4	2	0.89225	0.996322	19090	0	0.22773	0.994322	5413	1	3.7886
EPHX2	2	0.83125	0.996322	17787	0	0.182	0.994322	3931	1	3.7878
hsa-mir-593	2	0.90371	0.996322	19325	0	0.16399	0.994322	3419	2	3.7806
hsa-mir-8081	2	0.61388	0.996322	13633	1	0.025102	0.972765	649	1	3.7798
hsa-mir-1275	4	0.74223	0.996322	14275	1	0.041654	0.972765	667	2	3.7775
RMND1	2	0.69793	0.996322	15094	0	0.073377	0.994322	1694	1	3.7761
RNF130	2	0.86062	0.996322	18382	0	0.21196	0.994322	4922	1	3.7745
ATP6V0A4	2	0.56701	0.996322	12852	1	0.0058685	0.970617	147	1	3.7713
MBTPS2	1	0.83397	0.996322	17822	0	0.16615	0.994322	5102	1	3.7713
WDR45B	2	0.86327	0.996322	18436	0	0.1884	0.994322	4146	1	3.7712
VPREB3	2	0.88161	0.996322	18833	0	0.26647	0.994322	6582	1	3.7696
PEAR1	2	0.87269	0.996322	18636	0	0.21726	0.994322	5081	1	3.7683
G3BP2	2	0.92491	0.996322	19828	0	0.13016	0.994322	2711	2	3.7677
ECI2	2	0.96556	0.997574	20675	0	0.062927	0.994322	1498	2	3.7671
hsa-mir-485	4	0.88785	0.996322	18995	1	0.21548	0.994322	3619	2	3.7671
hsa-mir-4319	4	0.98057	0.998559	20987	0	0.08133	0.994322	1411	2	3.7666
NEUROD2	2	0.89082	0.996322	19065	0	0.27615	0.994322	6828	1	3.764
GLYAT	2	0.93282	0.996322	20007	0	0.11745	0.994322	2475	2	3.7631
HK3	2	0.88117	0.996322	18824	0	0.28013	0.994322	6927	1	3.7626
hsa-mir-6086	2	0.85326	0.996322	18238	0	0.20278	0.994322	4619	1	3.7625
RNF183	2	0.72497	0.996322	15581	0	0.14855	0.994322	3090	1	3.7623
ILF3	2	0.75467	0.996322	16167	0	0.16789	0.994322	3491	1	3.7621
FANK1	2	0.91514	0.996322	19599	0	0.14592	0.994322	3029	2	3.7615
C17orf97	2	0.89018	0.996322	19054	0	0.27615	0.994322	6823	1	3.76
FANCC	2	0.58859	0.996322	13220	1	0.016822	0.972765	443	1	3.758
ULBP3	2	0.87772	0.996322	18749	0	0.29006	0.994322	7100	1	3.7576
PPCS	2	0.88975	0.996322	19042	0	0.2852	0.994322	7005	1	3.7572
PCBP2	2	0.74105	0.996322	15907	0	0.17004	0.994322	3546	1	3.7566
TXNDC9	2	0.91386	0.996322	19573	0	0.14794	0.994322	3071	2	3.7552
hsa-mir-6814	4	0.92894	0.996322	19918	0	0.17163	0.994322	2780	3	3.7537
hsa-mir-491	2	0.9272	0.996322	19878	0	0.12656	0.994322	2642	2	3.7503
RAG1	2	0.67303	0.996322	14620	0	0.13316	0.994322	2765	1	3.7486
CCDC63	2	0.86662	0.996322	18515	0	0.21452	0.994322	4991	1	3.7484
EME1	2	0.84503	0.996322	18058	0	0.20642	0.994322	4731	1	3.7482
SLC8A2	2	0.85761	0.996322	18324	0	0.19203	0.994322	4266	1	3.7458
SMEK1	2	0.71626	0.996322	15431	0	0.15179	0.994322	3160	1	3.7458
RPL39L	2	0.61343	0.996322	13628	1	0.037562	0.972765	963	1	3.7443
PSG1	2	0.92915	0.996322	19925	0	0.12345	0.994322	2581	2	3.7439
ATP13A2	2	0.72913	0.996322	15665	0	0.14225	0.994322	2952	1	3.7435
CES5A	2	0.88715	0.996322	18974	0	0.28214	0.994322	6968	1	3.7425
hsa-mir-3646	2	0.69646	0.996322	15063	0	0.093475	0.994322	2042	1	3.7423
SP1	2	0.88779	0.996322	18992	0	0.29889	0.994322	7277	1	3.7421
PCED1A	2	0.74798	0.996322	16038	0	0.16438	0.994322	3429	1	3.7401
LRRC38	2	0.83095	0.996322	17784	0	0.18633	0.994322	4081	1	3.7395
ATF4	2	0.9348	0.996342	20054	0	0.11418	0.994322	2407	2	3.737
KIR2DL4	2	0.85656	0.996322	18311	0	0.2235	0.994322	5281	1	3.7363
GATAD2A	2	0.6088	0.996322	13561	1	0.030387	0.972765	797	1	3.7352
CHUK	2	0.51634	0.996322	11923	1	0.10493	0.994322	2251	1	3.7343
GGT6	2	0.61319	0.996322	13624	1	0.055126	0.993632	1355	1	3.7335
KRT37	2	0.84838	0.996322	18128	0	0.20278	0.994322	4620	1	3.7329
CSN1S1	2	0.92035	0.996322	19725	0	0.13762	0.994322	2860	2	3.7308
SBF2	2	0.93842	0.996692	20122	0	0.10839	0.994322	2311	2	3.7283
IFNA10	2	0.7042	0.996322	15197	0	0.11237	0.994322	2376	1	3.7266
DAGLB	2	0.61172	0.996322	13597	1	0.038181	0.972765	978	1	3.7238
ZNRF1	2	0.74821	0.996322	16044	0	0.17526	0.994322	3720	1	3.7232
NIT2	3	0.98335	0.998901	21033	0	0.043633	0.972765	820	3	3.7218
MAS1	2	0.85463	0.996322	18271	0	0.2235	0.994322	5287	1	3.7215
FKRP	2	0.69258	0.996322	14983	0	0.10104	0.994322	2176	1	3.7184
MKI67IP	2	0.84106	0.996322	17978	0	0.20176	0.994322	4580	1	3.7176
KCNH6	1	0.81502	0.996322	17414	0	0.18505	0.994322	5536	1	3.7174
GPR155	2	0.89344	0.996322	19113	0	0.28938	0.994322	7072	1	3.717
NUSAP1	2	0.69522	0.996322	15028	0	0.15421	0.994322	3212	1	3.715
CCL26	3	0.75346	0.996322	16039	1	0.16542	0.994322	3296	2	3.7137
EVI2B	2	0.89721	0.996322	19194	0	0.30144	0.994322	7330	1	3.7126
RHD	2	0.89605	0.996322	19162	0	0.23996	0.994322	5784	1	3.7113
OMD	2	0.87555	0.996322	18692	0	0.2132	0.994322	4948	1	3.7107
SEMA6B	2	0.71955	0.996322	15486	0	0.14437	0.994322	2998	1	3.7091
ILDR2	2	0.8223	0.996322	17585	0	0.18052	0.994322	3889	1	3.7087
CLPX	2	0.83831	0.996322	17930	0	0.20642	0.994322	4733	1	3.7079
TH	2	0.87588	0.996322	18701	0	0.26777	0.994322	6631	1	3.7069
ATAD3A	2	0.90554	0.996322	19364	0	0.16117	0.994322	3359	2	3.7058
hsa-mir-4444-1	4	0.75093	0.996322	14600	1	0.057556	0.994322	985	2	3.7039
MANEA	2	0.84237	0.996322	18005	0	0.21452	0.994322	4988	1	3.7031
C10orf76	3	0.59584	0.996322	12060	1	0.15209	0.994322	2969	2	3.7024
BTLA	3	0.63244	0.996322	13071	1	0.16075	0.994322	3189	2	3.702
hsa-mir-4255	4	0.7949	0.996322	16279	1	0.13323	0.994322	2186	2	3.6975
CACNA2D3	2	0.86697	0.996322	18522	0	0.23701	0.994322	5674	1	3.6967
hsa-mir-3650	4	0.76598	0.996322	15214	1	0.2034	0.994322	3343	2	3.6966
ITGAE	2	0.83411	0.996322	17835	0	0.18235	0.994322	3944	1	3.6961
TCTA	2	0.87844	0.996322	18762	0	0.22626	0.994322	5370	1	3.6945
GXYLT2	2	0.86279	0.996322	18428	0	0.28013	0.994322	6925	1	3.6937
MBIP	2	0.81202	0.996322	17361	0	0.2132	0.994322	4950	1	3.6905
FGF4	2	0.6634	0.996322	14460	1	0.085577	0.994322	1909	1	3.69
ZNF443	2	0.91077	0.996322	19488	0	0.15291	0.994322	3179	2	3.6899
HMHA1	2	0.86075	0.996322	18385	0	0.27185	0.994322	6754	1	3.6893
GPR83	2	0.8378	0.996322	17918	0	0.21452	0.994322	4985	1	3.6866
PLD6	2	0.84334	0.996322	18028	0	0.23039	0.994322	5479	1	3.6866
TEKT1	2	0.66252	0.996322	14442	1	0.073076	0.994322	1688	1	3.6862
TTC34	2	0.83904	0.996322	17943	0	0.20078	0.994322	4541	1	3.6841
ZDHHC13	2	0.6725	0.996322	14612	0	0.086058	0.994322	1919	1	3.6827
C19orf35	2	0.69183	0.996322	14960	0	0.12502	0.994322	2616	1	3.6813
[truncated: 18,541 more rows]
